# Supplementary material
Source: publisher figshare collection journal article supplement (https://gsapubs.figshare.com/ndownloader/files/22537445)
Supplement: Supplementary file 1 [file 22537445]

## Sheet: RAW DATA
SUPPLEMENTAL DATA FILE 4: POWICK AGGLOMERATIVE HIERARCHICAL CLUSTER (AHC) RAW DATA
Depth (cm)	Modelled Calendrical Date	Grain Size	Zr:Rb	Net IRSL (x10⁴)	Net OSL (x10⁴)	IRSL:OSL
1	2017	4.5	2.20212
2	2015.4	4.5	2.05896
3	2011.95	4.5	1.67792
4	2008.05	4.555	1.69621
5	2004.25	4.61	1.7742	1.7827	4.4338	0.40207
6	2000.4	4.57	1.75547
7	1996.2	4.53	1.75991
8	1991.95	4.515	1.74084
9	1987.2	4.5	1.90743
10	1983.15	4.635	1.75836	1.4994	3.9194	0.382559
11	1979.05	4.77	2.10851
12	1974.75	4.75	1.9419
13	1970	4.73	2.09852
14	1965.65	4.725	1.92456
15	1961.5	4.72	1.96329	1.5638	4.0729	0.383952
16	1957.3	4.705	1.94955
17	1952.6	4.69	2.04156
18	1948.25	4.68	2.10513
19	1943.95	4.67	2.04177
20	1939.2	4.625	1.98656	1.4574	4.1069	0.354866
21	1934.95	4.58	2.02789
22	1930.65	4.59	1.86084
23	1926.4	4.6	2.07686
24	1921.65	4.595	2.03286
25	1917.45	4.59	2.10327	1.7571	4.7309	0.371409
26	1913.25	4.615	1.99218
27	1909.05	4.64	1.90882
28	1904.3	4.615	2.10175
29	1900.2	4.59	2.16003
30	1895.9	4.59	2.09973	2.6245	5.9888	0.438235
31	1891.7	4.59	2.16954
32	1887.05	4.665	2.4273
33	1882.8	4.74	2.15935
34	1878.4	4.645	2.14818
35	1874.05	4.55	2.15138	1.8867	4.7526	0.396983
36	1869.9	4.545	2.18025
37	1865.2	4.54	2.00232
38	1861	4.645	2.19735
39	1856.75	4.75	2.25634
40	1852.05	4.66	2.37453	3.381	6.8548	0.493231
41	1847.85	4.57	2.43808
42	1843.65	4.605	2.15614
43	1839.05	4.64	2.46639
44	1834.85	4.805	2.09226
45	1830.6	4.97	2.06585	2.1178	5.0685	0.417836
46	1826.5	4.9	2.1192
47	1821.9	4.83	1.98913
48	1817.65	4.95	1.84063
49	1813.6	5.07	1.97512
50	1809	5.085	1.97206	1.1629	3.0404	0.382483
51	1804.95	5.1	1.79429
52	1801	5.035	1.85257
53	1796.85	4.97	2.00816
54	1792.2	5.04	1.94209
55	1788.05	5.11	1.928	1.6056	3.6467	0.440288
56	1784.1	5.055	1.74
57	1780	5	1.70483
58	1775.85	5.115	1.68189
59	1771.75	5.23	1.70115
60	1767.5	5.23	1.61998	1.0775	2.8333	0.380299
61	1763.35	5.23	1.61026
62	1758.55	5.41	1.64732
63	1754.35	5.59	1.66575
64	1750	5.7	1.70918
65	1745.25	5.81	1.84848	1.6866	3.7778	0.44645
66	1741	5.81	1.75607
67	1736.75	5.81	1.68006
68	1732.65	5.43	1.651
69	1727.9	5.05	1.52044
70	1723.85	5.06	1.78481	1.331	3.2953	0.403909
71	1719.75	5.07	1.61418
72	1715.05	5.055	1.69291
73	1710.95	5.04	1.59036
74	1706.8	5.04	1.63553
75	1702.2	5.04	1.58914	2.2733	5.5308	0.411026
76	1698	5.19	1.53367
77	1693.35	5.34	1.57776
78	1689.2	5.37	1.50333
79	1684.9	5.4	1.47514
80	1680	5.435	1.51073	2.2388	5.0899	0.439851
81	1675.7	5.47	1.5113
82	1671.1	5.49	1.54091
83	1666.95	5.51	1.52817
84	1662.45	5.505	1.47622
85	1658.2	5.5	1.45768	0.5148	1.7194	0.299407
86	1653.5	5.395	1.49508
87	1649.55	5.29	1.45369
88	1645.5	5.415	1.46717
89	1640.9	5.54	1.52748
90	1636.25	5.495	1.38463	0.5514	1.7608	0.313153
91	1632.05	5.45	1.505
92	1627.6	5.47	1.4796
93	1623.4	5.49	1.54102
94	1618.9	5.49	1.52814
95	1614.75	5.49	1.51177	0.8872	2.2672	0.39132
96	1610.2	5.55	1.57184
97	1606.35	5.61	1.51818
98	1601.95	5.525	1.41363
99	1597.8	5.44	1.43137
100	1593.1	5.54	1.5259	0.8471	2.062	0.410815
101	1589.05	5.64	1.51715
102	1585.2	5.53	1.42081
103	1580.9	5.42	1.48997
104	1577.1	5.325	1.54695
105	1573.1	5.23	1.44537	0.6467	2.0918	0.30916
106	1568.55	5.36	1.44866
107	1564.55	5.49	1.40477
108	1560.3	5.365	1.45423
109	1555.85	5.24	1.47628
110	1551.55	5.59	1.43046	0.595	1.7377	0.342407
111	1547.65	5.94	1.29249
112	1542.9	5.88	1.35101
113	1538.55	5.82	1.3771
114	1533.95	5.87	1.22647
115	1529.2	5.92	1.18018	0.6631	1.6643	0.398426
116	1524.4	5.995	1.23778
117	1520.2	6.07	1.13799
118	1515.8	6.075	1.09912
119	1511.35	6.08	1.06751
120	1506.8	6.105	1.12963	0.4778	1.3332	0.358386
121	1502.15	6.13	1.12963
122	1497.6	6.045	1.07901
123	1493.55	5.96	1.05333
124	1489.35	6.04	1.06963
125	1484.5	6.12	1.04379	0.4178	1.2288	0.340007
126	1480.1	6.105	1.03351
127	1476.1	6.09	1.05602
128	1471.6	6.07	1.00923
129	1467.5	6.05	1.04728
130	1463.35	6.12	1.08922	0.4994	1.316	0.379483
131	1459.1	6.19	1.04905
132	1454.7	6.125	1.07971
133	1450.85	6.06	1.04887
134	1446.8	6.095	1.04996
135	1442.25	6.13	1.03311	0.321	0.8517	0.376893
136	1438.1	6.115	1.07635
137	1434.2	6.1	1.08144
138	1429.9	6.115	1.0736
139	1426.05	6.13	1.07192
140	1421.95	6.12	1.03013	0.3764	0.8771	0.429141
141	1417.75	6.11	1.09718
142	1413.75	6.11	1.07394
143	1410.1	6.11	0.99658
144	1406.35	6.1	0.994538
145	1402.5	6.09	1.04298	0.369	0.7836	0.470904
146	1398.35	6.09	0.994674
147	1394.6	6.09	1.04347
148	1390.75	6.135	1.06364
149	1386.8	6.18	1.03823
150	1382.25	6.165	1.03606	0.311	0.7076	0.439514
151	1378.75	6.15	1.00137
152	1374.9	6.135	1.02498
153	1370.9	6.12	0.992725
154	1367	6.11	1.05921
155	1363	6.1	1.0414	0.3679	0.9654	0.381086
156	1358.5	6.135	1.06195
157	1354.45	6.17	1.03631
158	1350.3	6.145	1.11762
159	1346.25	6.12	1.15444
160	1342	6.065	1.16363	0.4751	1.4167	0.335357
161	1337.95	6.01	1.24083
162	1334.2	6.01	1.19686
163	1329.8	6.01	1.17668
164	1325.9	6.045	1.1977
165	1322	6.08	1.23605	0.6385	1.5225	0.419376
166	1318.2	5.89	1.25416
167	1314.35	5.7	1.25438
168	1310.55	5.81	1.26322
169	1306.15	5.92	1.39762
170	1302.15	5.985	1.35074	0.6533	1.4796	0.441538
171	1298.2	6.05	1.3261
172	1294.3	6.025	1.39345
173	1290	6	1.41641
174	1286.05	5.955	1.34765
175	1282.15	5.91	1.39462	1.1607	2.58825	0.44845
176	1278.25	5.9	1.38594
177	1274.05	5.89	1.35561
178	1270.25	5.92	1.35293
179	1266.4	5.95	1.29198
180	1262.5	5.985	1.38667	1.4174	2.9161	0.48606
181	1258.1	6.02	1.38523
182	1254.25	6.035	1.3534
183	1250.4	6.05	1.38882
184	1246	6.01	1.3304
185	1242.1	5.97	1.30042	1.609	3.0193	0.532905
186	1238.2	5.985	1.28426
187	1233.95	6	1.31182
188	1230.2	6.015	1.31032
189	1226.4	6.03	1.34531
190	1222.1	5.97	1.33421	0.8742	1.8458	0.473616
191	1218.3	5.91	1.34169
192	1214.45	5.915	1.34197
193	1210.65	5.92	1.39667
194	1206.4	5.965	1.33531
195	1202.55	6.01	1.43884	1.7526	3.2447	0.540142
196	1198.7	5.96	1.47067
197	1194.45	5.91	1.40086
198	1190.55	5.895	1.46351
199	1186.75	5.88	1.42526
200	1183.45	5.9	1.42816	1.6462	3.0576	0.538396
201	1179.85	5.92	1.35186
202	1176.5	5.935	1.43715
203	1172.6	5.95	1.30707
204	1169.3	5.935	1.3512
205	1165.6	5.92	1.37774	1.0601	1.918	0.552711
206	1162.4	5.96	1.51722
207	1158.55	6	1.42235
208	1155.35	5.955	1.38723
209	1151.65	5.91	1.42499
210	1148.4	5.92	1.46126	1.01415	2.1029	0.482263
211	1144.65	5.93	1.39537
212	1141.25	5.91	1.32666
213	1137.4	5.89	1.25496
214	1134	5.87	1.18006
215	1130.05	5.85	1.10175	0.6843	1.9835	0.344996
216	1126.75	5.975	1.13791
217	1122.9	6.1	1.08364
218	1119.1	5.97	1.19396
219	1115.8	5.84	1.43727
220	1112.5	5.865	1.34486	0.5579	1.6547	0.337161
221	1108.8	5.89	1.30626
222	1104.95	5.715	1.18611
223	1101.6	5.54	1.41062
224	1097.85	5.695	1.42588
225	1093.95	5.85	1.24553	0.4316	1.3259	0.325515
226	1090.65	5.885	1.11258
227	1086.8	5.92	1.08919
228	1083.05	5.955	1.15148
229	1079.8	5.99	1.06493
230	1076.05	6.06	1.06643	1.2201	1.3987	0.351858
231	1072.8	6.13	1.07042
232	1068.95	6.15	1.02954
233	1065.65	6.17	1.06677
234	1061.85	6.175	1.08574
235	1058.1	6.18	0.950386	0.3879	0.9628	0.402887
236	1054.85	6.275	0.971147
237	1051.1	6.37	0.954625
238	1047.3	6.41	0.971966
239	1043.55	6.45	0.958177
240	1040.35	6.365	1.01959	0.5474	1.3008	0.420818
241	1036.65	6.28	0.940938
242	1033.3	6.27	0.959981
243	1029.4	6.26	1.02638
244	1026.15	6.255	1.11874
245	1022.3	6.25	1.0897	0.4834	0.9145	0.528595
246	1018.45	6.25	1.14852
247	1015.2	6.25	1.17166
248	1011.4	6.235	1.12605
249	1008.05	6.22	1.03663
250	1004.25	6.25	1.1863	0.5465	1.0917	0.500595
251	1000.4	6.28	1.06412
252	997.1	6.27	1.08427
253	993.4	6.26	1.13326
254	989.55	6.265	1.11473
255	986.2	6.27	1.16104	0.7596	1.6469	0.46123
256	982.45	6.235	1.1354
257	978.6	6.2	1.10911
258	975.4	6.125	1.14789
259	971.6	6.05	1.24313
260	968.3	6.13	1.27176	0.839	1.966	0.426755
261	964.55	6.21	1.2879
262	960.85	6.12	1.21218
263	957.7	6.03	1.0974
264	953.95	6.045	1.04107
265	950.1	6.06	1.10843	1.1217	2.4504	0.457762
266	946.85	6.08	1.30609
267	943.2	6.1	1.26587
268	939.4	6.12	1.24726
269	936.1	6.14	1.23247
270	932.3	6.1	1.1625	1.2418	2.6043	0.476827
271	928.95	6.06	1.25087
272	925.4	6.065	1.24899
273	921.65	6.07	1.2823
274	918.35	6.075	1.22073
275	915.05	6.08	1.16236	1.2342	2.7173	0.454201
276	911.25	6.115	1.20007
277	907.6	6.15	1.22872
278	904.4	6.135	1.23627
279	900.7	6.12	1.22078
280	897.05	6.115	1.24309	1.23025	2.6593	0.462622
281	893.8	6.11	1.21626
282	890.3	6.125	1.24032
283	886.65	6.14	1.23499
284	883.65	6.155	1.2629
285	880	6.17	1.16222	1.0625	2.1974	0.483526
286	876.7	6.14	1.15931
287	873	6.11	1.06427
288	869.25	6.115	1.09167
289	865.35	6.12	1.22583
290	861.85	6.08	1.16672	1.1716	2.3701	0.494325
291	857.7	6.04	1.19708
292	853.65	6.09	1.13898
293	849.4	6.14	1.26022
294	845	6.135	1.2606
295	840.75	6.13	1.27132	0.9951	2.0858	0.477083
296	836.75	6.17	1.15253
297	833	6.21	1.17683
298	828.75	6.165	1.15046
299	824.45	6.12	1.20145
300	820	6.11	1.24097	1.2125	2.5079	0.483472
301	815.65	6.1	1.31992
302	811.6	6.09	1.22937
303	807.4	6.08	1.18505
304	803.1	6.105	1.18572
305	798.95	6.13	1.19849	0.7662	1.7952	0.426805
306	794.9	6.155	1.13449
307	790.7	6.18	1.19361
308	786.55	6.19	1.20168
309	782.9	6.2	1.1913
310	778.65	6.15	1.23947	1.5069	3.3776	0.446145
311	774.4	6.1	1.15863
312	770.35	6.14	1.16482
313	766.4	6.18	1.15618
314	762.3	6.155	1.13581
315	758.25	6.13	1.12461	1.5731	3.5223	0.446612
316	754	6.14	1.21217
317	749.95	6.15	1.15476
318	745.7	6.145	1.17429
319	741.6	6.14	1.16727
320	737.4	6.125	1.18865	1.8074	3.6019	0.501791
321	733.15	6.11	1.26583
322	729.05	6.13	1.2645
323	725.55	6.15	1.2361
324	721.4	6.18	1.20929
325	717.05	6.21	1.18997	1.3061	2.9868	0.437291
326	712.85	6.14	1.23417
327	708.75	6.07	1.25124
328	704.6	6.105	1.16395
329	700.6	6.14	1.24212
330	696.5	6.105	1.2264	1.3577	2.9367	0.462322
331	692.45	6.07	1.2646
332	688.3	6.06	1.19024
333	684.2	6.05	1.15741
334	680.2	6.05	1.22344
335	676	6.05	1.13924	1.1368	2.5407	0.447436
336	672	6.095	1.21257
337	668	6.14	1.21598
338	663.75	6.135	1.19513
339	659.65	6.13	1.07097
340	655.6	6.15	1.07981	1.5583	3.4317	0.45409
341	651.95	6.17	1.18464
342	647.95	6.19	1.19364
343	644	6.21	1.18756
344	639.95	6.21	1.18207
345	636.4	6.21	1.184	1.3185	2.99585	0.440109
346	632.25	6.19	1.17587
347	628.7	6.17	1.15497
348	624.75	6.155	1.20752
349	621.35	6.14	1.17949
350	617.95	6.155	1.17662	1.28745	2.9147	0.441709
351	614.05	6.17	1.24287
352	610.7	6.145	1.15762
353	607.2	6.12	1.19657
354	603.35	6.115	1.24972
355	600.1	6.11	1.11468	1.2787	2.87285	0.445098
356	596.95	6.155	1.10715
357	593.5	6.2	1.20382
358	589.8	6.235	1.18444
359	586.4	6.27	1.14911
360	583.3	6.25	1.11526	1.2623	2.6832	0.470446
361	579.45	6.23	1.12756
362	576.1	6.165	1.12287
363	572.8	6.1	1.12322
364	568.85	6.145	1.15811
365	565.55	6.19	1.15811	1.3649	3.1754	0.429836
366	562.3	6.165	1.13613
367	558.3	6.14	1.0934
368	554.9	6.16	1.14864
369	551.7	6.18	1.1222
370	548.4	6.185	1.16706	1.3419	3.1131	0.431049
371	544.65	6.19	1.17102
372	541.25	6.195	1.17862
373	538.1	6.2	1.16271
374	534.2	6.18	1.17986
375	530.85	6.16	1.17408	1.2529	2.8195	0.44437
376	527.55	6.18	1.12291
377	523.9	6.2	1.08635
378	520.7	6.2	1.13149
379	517.35	6.2	1.09127
380	513.4	6.205	1.15803	1.1839	2.5924	0.456681
381	510.3	6.21	1.12533
382	506.95	6.2	1.15451
383	503.6	6.19	1.11556
384	500.35	6.195	0.988978
385	496.45	6.2	1.01937	0.9485	2.34	0.405342
386	493.1	6.205	1.06001
387	489.85	6.21	1.11712
388	486.55	6.22	1.20324
389	482.8	6.23	1.15368
390	479.6	6.24	1.08987	0.9088	2.0207	0.449745
391	476.3	6.25	1.19237
392	472.35	6.22	1.11358
393	468.95	6.19	1.04835
394	465.6	6.195	1.10916
395	462.15	6.2	1.15426	0.9625	2.3433	0.410746
396	458.9	6.205	1.13079
397	455.1	6.21	1.15947
398	451.75	6.2	1.09353
399	448.4	6.19	1.04405
400	445.1	6.2	1.09828	0.8601	2.0207	0.425645
401	441.9	6.21	1.05984
402	437.95	6.21	1.14236
403	434.55	6.21	1.12795
404	431.3	6.145	1.12253
405	427.6	6.08	1.05956	0.737	2.2061	0.334074
406	424.1	6.11	1.08423
407	420.8	6.14	1.13445
408	417.3	6.165	1.09596
409	413.95	6.19	1.05909
410	409.85	6.145	1.05287	0.905	2.2399	0.404036
411	406.55	6.1	1.04266
412	403.25	6.14	1.09989
413	400.05	6.18	1.05718
414	396.75	6.225	1.07934
415	393.45	6.27	1.0589	0.8376	2.0248	0.41367
416	390.2	6.235	1.10156
417	386.85	6.2	1.1004
418	382.8	6.195	1.07528
419	379.35	6.19	1.16062
420	375.85	6.215	1.09331	1.0885	2.6168	0.415966
421	371.9	6.24	1.03898
422	368.3	6.2	1.08537
423	364.7	6.16	1.21264
424	360.7	6.105	1.14008
425	357.35	6.05	1.14601	1.1722	3.1269	0.374876
426	353.95	6.08	1.10854
427	349.8	6.11	1.10189
428	346.2	6.14	1.083
429	342.75	6.17	1.07047
430	339.15	6.17	1.05911	0.9879	2.3282	0.424319
431	335.25	6.17	1.04877
432	331.5	6.175	1.03931
433	327.9	6.18	1.03064
434	323.65	6.18	1.09078
435	319.75	6.18	1.0706	0.88	2.0092	0.437985
436	316.15	6.165	1.08623
437	312.15	6.15	1.01301
438	308.45	6.17	1.0353
439	304.9	6.19	0.977176
440	300.8	6.205	0.974344	0.6844	1.6585	0.412662
441	297.1	6.22	1.00553
442	293.45	6.205	1.05753
443	289.2	6.19	0.985122
444	285.6	6.22	0.981303
445	282.1	6.25	0.948859	0.6361	1.6625	0.382617
446	277.7	6.245	0.957797
447	274.05	6.24	0.949188
448	270.4	6.28	0.994651
449	266.25	6.32	0.985883
450	262.8	6.325	0.92679	0.6264	1.471	0.425833
451	259.1	6.33	0.980073
452	255.1	6.335	0.983993
453	251.3	6.34	1.01079
454	247.6	6.34	0.961901
455	243.75	6.34	0.983673	0.5741	1.3257	0.433054
456	239.65	6.35	0.919011
457	236.35	6.36	1.00879
458	232.5	6.355	1.06064
459	228.3	6.35	1.09332
460	224.55	6.325	1.05337	0.8009	1.7025	0.470426
461	220.8	6.3	1.0793
462	216.7	6.28	1.10312
463	213.05	6.26	1.05399
464	209.4	6.28	1.0845
465	205.2	6.3	1.13689	0.8317	2.0562	0.404484
466	201.9	6.295	1.11538
467	198	6.29	1.09416
468	193.8	6.26	1.09136
469	189.75	6.23	1.08393
470	186	6.205	1.04273	1.23545	2.4793	0.498306
471	182.5	6.18	1.15108
472	178.25	6.18	1.19012
473	174.55	6.18	1.10843
474	171.1	6.135	1.19114
475	166.9	6.09	1.24896	1.5205	3.6438	0.417284
476	163.4	6.105	1.23603
477	159.8	6.12	1.25697
478	155.65	6.09	1.22919
479	152.05	6.06	1.17524
480	148.4	6.03	1.19198	1.5472	3.3447	0.462583
481	144.6	6	1.25302
482	140.8	5.995	1.17826
483	136.65	5.99	1.22327
484	133.1	6.02	1.29164
485	129.3	6.05	1.25689	1.4126	2.837	0.49792
486	125.2	6.04	1.32148
487	121.55	6.03	1.31665
488	118.05	5.985	1.34306
489	113.75	5.94	1.37274
490	110.1	5.945	1.29526	2.1772	3.9281	0.554263
491	106.6	5.95	1.42871
492	102.35	5.955	1.31398
493	98.45	5.96	1.2889
494	94.9	5.97	1.37354
495	91.2	5.98	1.35184	1.2885	2.3562	0.546855
496	87.3	5.97	1.33344
497	83.2	5.96	1.32528
498	79.75	5.985	1.38729
499	76.3	6.01	1.34296
500	72.15	6.015	1.38562	1.1701	2.1548	0.54302
501	68.5	6.02	1.34571
502	64.5	6.04	1.34331
503	60.5	6.06	1.32775
504	56.5	6.045	1.34172
505	52.5	6.03	1.34631	1.5463	2.7436	0.563603
506	49	6.035	1.34378
507	45	6.04	1.31336
508	41	6.01	1.29693
509	37	5.98	1.3023
510	33	6.005	1.32382	1.4679	2.6631	0.5512
511	29.5	6.03	1.26117
512	25.5	6.03	1.27674
513	21.5	6.03	1.22123
514	17.5	6.025	1.27838
515	13.5	6.02	1.29526	1.4166	2.3285	0.608374
516	10	5.995	1.34406
517	6	5.97	1.39627
518	2	5.96	1.36194
519	-1	5.95	1.38052
520	-4	5.965	1.38096	1.8329	3.1041	0.590477
521	-6.5	5.98	1.35255
522	-10	5.97	1.36443
523	-13	5.98	1.30596	1.6798	2.7239	0.616689
	Mean	5.88358	1.30629	1.13676	2.55504	0.437947
	St Dev	0.48232	0.302182	0.536852	1.14083	0.0649277
		-0.48608	-0.302182	-0.536852	-1.14083	-0.0649277

## Sheet: LOG DATA
SUPPLEMENTAL DATA FILE 4: POWICK HAMS AGGLOMERATIVE HIERARCHICAL CLUSTERING (AHC) LOG DATA
Depth (cm)	Modelled Calendrical Date	Grain Size	Zr:Rb	Net IRSL (x10^⁻⁴)	Net OSL (x10^⁻⁴)	IRSL:OSL
1	2017	2.84639	2.96451
2	2015.4	2.84639	2.49078
3	2011.95	2.84639	1.2298
4	2008.05	2.73324	1.29033
5	2004.25	2.62009	1.54842	1.20319	1.64684	-0.55256
6	2000.4	2.70238	1.48645
7	1996.2	2.78468	1.50114
8	1991.95	2.81553	1.43802
9	1987.2	2.84639	1.98931
10	1983.15	2.56866	1.496	0.675488	1.19594	-0.853078
11	1979.05	2.29093	2.65475
12	1974.75	2.33208	2.10338
13	1970	2.37322	2.62168
14	1965.65	2.38351	2.04599
15	1961.5	2.39379	2.17417	0.795447	1.33049	-0.831609
16	1957.3	2.42465	2.12871
17	1952.6	2.45551	2.43319
18	1948.25	2.47608	2.64356
19	1943.95	2.49666	2.4339
20	1939.2	2.58923	2.25118	0.597254	1.3603	-1.27959
21	1934.95	2.68181	2.38796
22	1930.65	2.66124	1.83513
23	1926.4	2.64067	2.54999
24	1921.65	2.65095	2.40438
25	1917.45	2.66124	2.63739	1.15551	1.90727	-1.0248
26	1913.25	2.60981	2.26976
27	1909.05	2.55838	1.99393
28	1904.3	2.60981	2.63236
29	1900.2	2.66124	2.82525
30	1895.9	2.66124	2.62568	2.77122	3.00989	0.00443184
31	1891.7	2.66124	2.85671
32	1887.05	2.50694	3.70969
33	1882.8	2.35265	2.823
34	1878.4	2.54809	2.78603
35	1874.05	2.74353	2.7966	1.39692	1.92629	-0.630921
36	1869.9	2.75382	2.89216
37	1865.2	2.7641	2.30333
38	1861	2.54809	2.94873
39	1856.75	2.33208	3.14396
40	1852.05	2.51723	3.53506	4.18036	3.76899	0.851471
41	1847.85	2.70238	3.74538
42	1843.65	2.63038	2.81237
43	1839.05	2.55838	3.83906
44	1834.85	2.21893	2.60096
45	1830.6	1.87947	2.51358	1.82739	2.20319	-0.309749
46	1826.5	2.02348	2.69011
47	1821.9	2.16749	2.25968
48	1817.65	1.92062	1.76827
49	1813.6	1.67375	2.21333
50	1809	1.64289	2.20319	0.0486859	0.425449	-0.854248
51	1804.95	1.61203	1.61489
52	1801	1.74575	1.80776
53	1796.85	1.87947	2.32267
54	1792.2	1.73547	2.104
55	1788.05	1.59146	2.05738	0.873308	0.956905	0.0360635
56	1784.1	1.70461	1.43526
57	1780	1.81776	1.31885
58	1775.85	1.58117	1.24295
59	1771.75	1.34458	1.30668
60	1767.5	1.34458	1.03807	-0.11039	0.243914	-0.887885
61	1763.35	1.34458	1.00591
62	1758.55	0.974274	1.12856
63	1754.35	0.603965	1.18954
64	1750	0.377665	1.33326
65	1745.25	0.151365	1.79425	1.02419	1.07182	0.130967
66	1741	0.151365	1.48843
67	1736.75	0.151365	1.23689
68	1732.65	0.933129	1.14072
69	1727.9	1.71489	0.708663
70	1723.85	1.69432	1.58354	0.361808	0.648883	-0.52425
71	1719.75	1.67375	1.01888
72	1715.05	1.70461	1.27943
73	1710.95	1.73547	0.940054
74	1706.8	1.73547	1.08952
75	1702.2	1.73547	0.935995	2.11704	2.60843	-0.414637
76	1698	1.42687	0.75244
77	1693.35	1.11828	0.89836
78	1689.2	1.05657	0.652045
79	1684.9	0.994847	0.558746
80	1680	0.922843	0.676548	2.05278	2.22195	0.0293328
81	1675.7	0.850838	0.678429
82	1671.1	0.809693	0.776392
83	1666.95	0.768547	0.73424
84	1662.45	0.778833	0.562321
85	1658.2	0.78912	0.500986	-1.15854	-0.732483	-2.13376
86	1653.5	1.00513	0.624746
87	1649.55	1.22115	0.487775
88	1645.5	0.963988	0.53237
89	1640.9	0.706829	0.731976
90	1636.25	0.799406	0.259239	-1.09036	-0.696194	-1.92204
91	1632.05	0.891984	0.657578
92	1627.6	0.850838	0.573508
93	1623.4	0.809693	0.776762
94	1618.9	0.809693	0.734144
95	1614.75	0.809693	0.679989	-0.464863	-0.252305	-0.718141
96	1610.2	0.686256	0.878745
97	1606.35	0.56282	0.701179
98	1601.95	0.737688	0.355214
99	1597.8	0.912556	0.413926
100	1593.1	0.706829	0.726726	-0.539558	-0.432175	-0.417883
101	1589.05	0.501102	0.697776
102	1585.2	0.727402	0.378952
103	1580.9	0.953702	0.607838
104	1577.1	1.14914	0.796377
105	1573.1	1.34458	0.460244	-0.912845	-0.406053	-1.98355
106	1568.55	1.07714	0.471119
107	1564.55	0.809693	0.32587
108	1560.3	1.06685	0.489566
109	1555.85	1.32401	0.562512
110	1551.55	0.603965	0.410903	-1.00915	-0.716442	-1.47149
111	1547.65	-0.116081	-0.0456888
112	1542.9	0.00735584	0.147988
113	1538.55	0.130792	0.234306
114	1533.95	0.0279286	-0.264156
115	1529.2	-0.0749351	-0.41736	-0.882297	-0.780782	-0.608695
116	1524.4	-0.229231	-0.226715
117	1520.2	-0.383526	-0.55697
118	1515.8	-0.393813	-0.68558
119	1511.35	-0.404099	-0.790195
120	1506.8	-0.455531	-0.584613	-1.22746	-1.07101	-1.22538
121	1502.15	-0.506963	-0.584613
122	1497.6	-0.332094	-0.752148
123	1493.55	-0.157226	-0.837133
124	1489.35	-0.321808	-0.783175
125	1484.5	-0.48639	-0.86869	-1.33922	-1.16252	-1.50845
126	1480.1	-0.455531	-0.902717
127	1476.1	-0.424672	-0.828208
128	1471.6	-0.383526	-0.983059
129	1467.5	-0.342381	-0.857129
130	1463.35	-0.48639	-0.71837	-1.18722	-1.08609	-0.900442
131	1459.1	-0.630399	-0.851273
132	1454.7	-0.496676	-0.749837
133	1450.85	-0.362953	-0.851884
134	1446.8	-0.434958	-0.848287
135	1442.25	-0.506963	-0.904028	-1.51953	-1.49307	-0.940333
136	1438.1	-0.476103	-0.760959
137	1434.2	-0.445244	-0.744102
138	1429.9	-0.476103	-0.770059
139	1426.05	-0.506963	-0.775604
140	1421.95	-0.48639	-0.913888	-1.41634	-1.47081	-0.135619
141	1417.75	-0.465817	-0.692025
142	1413.75	-0.465817	-0.768916
143	1410.1	-0.465817	-1.02492
144	1406.35	-0.445244	-1.03168
145	1402.5	-0.424672	-0.871381	-1.43012	-1.55277	0.507588
146	1398.35	-0.424672	-1.03123
147	1394.6	-0.424672	-0.869767
148	1390.75	-0.517249	-0.803011
149	1386.8	-0.609826	-0.887079
150	1382.25	-0.578967	-0.894276	-1.53816	-1.61938	0.0241329
151	1378.75	-0.548108	-1.00908
152	1374.9	-0.517249	-0.930927
153	1370.9	-0.48639	-1.03768
154	1367	-0.465817	-0.817663
155	1363	-0.445244	-0.876614	-1.43217	-1.39341	-0.875764
156	1358.5	-0.517249	-0.808604
157	1354.45	-0.589254	-0.893452
158	1350.3	-0.537822	-0.624386
159	1346.25	-0.48639	-0.502512
160	1342	-0.37324	-0.4721	-1.23249	-0.997817	-1.58007
161	1337.95	-0.26009	-0.216622
162	1334.2	-0.26009	-0.36213
163	1329.8	-0.26009	-0.428935
164	1325.9	-0.332094	-0.35936
165	1322	-0.404099	-0.232472	-0.92812	-0.905078	-0.286025
166	1318.2	-0.0132169	-0.172512
167	1314.35	0.377665	-0.1718
168	1310.55	0.151365	-0.142529
169	1306.15	-0.0749351	0.30221
170	1302.15	-0.208658	0.147087	-0.900552	-0.942682	0.0553122
171	1298.2	-0.342381	0.0655377
172	1294.3	-0.290949	0.288439
173	1290	-0.239517	0.364407
174	1286.05	-0.14694	0.13687
175	1282.15	-0.0543624	0.292279	0.044588	0.0291134	0.161761
176	1278.25	-0.0337896	0.263584
177	1274.05	-0.0132169	0.163205
178	1270.25	-0.0749351	0.154317
179	1266.4	-0.136653	-0.0473614
180	1262.5	-0.208658	0.265996	0.522746	0.316493	0.741027
181	1258.1	-0.280662	0.261226
182	1254.25	-0.311522	0.155886
183	1250.4	-0.342381	0.273101
184	1246	-0.26009	0.0797655
185	1242.1	-0.177799	-0.0194304	0.879641	0.406953	1.46252
186	1238.2	-0.208658	-0.0729029
187	1233.95	-0.239517	0.0182895
188	1230.2	-0.270376	0.0133261
189	1226.4	-0.301235	0.129129
190	1222.1	-0.177799	0.0923904	-0.489079	-0.621687	0.549362
191	1218.3	-0.0543624	0.117139
192	1214.45	-0.0646487	0.118049
193	1210.65	-0.0749351	0.299077
194	1206.4	-0.167512	0.0960056
195	1202.55	-0.26009	0.438644	1.14713	0.604529	1.57399
196	1198.7	-0.157226	0.543963
197	1194.45	-0.0543624	0.312953
198	1190.55	-0.0235033	0.520272
199	1186.75	0.00735584	0.393691
200	1183.45	-0.0337896	0.403288	0.948934	0.440526	1.54709
201	1179.85	-0.0749351	0.150802
202	1176.5	-0.105794	0.433038
203	1172.6	-0.136653	0.0025608
204	1169.3	-0.105794	0.148601
205	1165.6	-0.0749351	0.236438	-0.142801	-0.558399	1.76757
206	1162.4	-0.157226	0.698001
207	1158.55	-0.239517	0.384067
208	1155.35	-0.14694	0.267837
209	1151.65	-0.0543624	0.392807
210	1148.4	-0.0749351	0.512837	-0.228392	-0.396324	0.682538
211	1144.65	-0.0955078	0.294779
212	1141.25	-0.0543624	0.0674121
213	1137.4	-0.0132169	-0.169871
214	1134	0.0279286	-0.417735
215	1130.05	0.069074	-0.676904	-0.842807	-0.500985	-1.4316
216	1126.75	-0.188085	-0.557229
217	1122.9	-0.445244	-0.73683
218	1119.1	-0.177799	-0.371752
219	1115.8	0.0896468	0.433447
220	1112.5	0.0382149	0.127636	-1.07825	-0.789197	-1.55228
221	1108.8	-0.0132169	-0.000106626
222	1104.95	0.346806	-0.397718
223	1101.6	0.706829	0.345256
224	1097.85	0.387951	0.395758
225	1093.95	0.069074	-0.201096	-1.31351	-1.07741	-1.73165
226	1090.65	-0.00293053	-0.641054
227	1086.8	-0.0749351	-0.718438
228	1083.05	-0.14694	-0.512311
229	1079.8	-0.218944	-0.798743
230	1076.05	-0.362953	-0.793779	0.155233	-1.0136	-1.32592
231	1072.8	-0.506963	-0.780574
232	1068.95	-0.548108	-0.915847
233	1065.65	-0.589254	-0.792633
234	1061.85	-0.59954	-0.729874
235	1058.1	-0.609826	-1.17779	-1.39492	-1.39569	-0.539978
236	1054.85	-0.805267	-1.10909
237	1051.1	-1.00071	-1.16376
238	1047.3	-1.083	-1.10638
239	1043.55	-1.16529	-1.15201
240	1040.35	-0.990422	-0.948771	-1.09781	-1.09941	-0.263816
241	1036.65	-0.815554	-1.20906
242	1033.3	-0.794981	-1.14604
243	1029.4	-0.774408	-0.92632
244	1026.15	-0.764122	-0.620664
245	1022.3	-0.753835	-0.716775	-1.21703	-1.43802	1.39614
246	1018.45	-0.753835	-0.522106
247	1015.2	-0.753835	-0.445525
248	1011.4	-0.722976	-0.59647
249	1008.05	-0.692117	-0.892395
250	1004.25	-0.753835	-0.397088	-1.09949	-1.2827	0.964895
251	1000.4	-0.815554	-0.801411
252	997.1	-0.794981	-0.734744
253	993.4	-0.774408	-0.572608
254	989.55	-0.784695	-0.633951
255	986.2	-0.794981	-0.480691	-0.702545	-0.796034	0.358602
256	982.45	-0.722976	-0.565518
257	978.6	-0.650972	-0.652538
258	975.4	-0.496676	-0.524191
259	971.6	-0.342381	-0.209035
260	968.3	-0.506963	-0.114284	-0.554646	-0.516324	-0.172378
261	964.55	-0.671544	-0.0608766
262	960.85	-0.48639	-0.311444
263	957.7	-0.301235	-0.691291
264	953.95	-0.332094	-0.877712
265	950.1	-0.362953	-0.654795	-0.0280577	-0.09172	0.305186
266	946.85	-0.404099	-0.000659398
267	943.2	-0.445244	-0.133783
268	939.4	-0.48639	-0.195371
269	936.1	-0.527535	-0.244303
270	932.3	-0.445244	-0.475846	0.195654	0.0431821	0.598817
271	928.95	-0.362953	-0.183417
272	925.4	-0.37324	-0.189628
273	921.65	-0.383526	-0.0793903
274	918.35	-0.393813	-0.283155
275	915.05	-0.404099	-0.476301	0.181497	0.142233	0.250338
276	911.25	-0.476103	-0.351535
277	907.6	-0.548108	-0.256725
278	904.4	-0.517249	-0.231739
279	900.7	-0.48639	-0.282973
280	897.05	-0.476103	-0.209146	0.17414	0.0913928	0.380035
281	893.8	-0.465817	-0.297949
282	890.3	-0.496676	-0.218313
283	886.65	-0.527535	-0.235951
284	883.65	-0.558394	-0.143598
285	880	-0.589254	-0.476762	-0.13833	-0.313489	0.701996
286	876.7	-0.527535	-0.486403
287	873	-0.465817	-0.800932
288	869.25	-0.476103	-0.710255
289	865.35	-0.48639	-0.266269
290	861.85	-0.404099	-0.461875	0.0648915	-0.162108	0.868322
291	857.7	-0.321808	-0.361408
292	853.65	-0.424672	-0.553684
293	849.4	-0.527535	-0.15246
294	845	-0.517249	-0.15122
295	840.75	-0.506963	-0.115731	-0.263877	-0.411313	0.602765
296	836.75	-0.589254	-0.508855
297	833	-0.671544	-0.428422
298	828.75	-0.578967	-0.515709
299	824.45	-0.48639	-0.346954
300	820	-0.465817	-0.216182	0.141076	-0.041318	0.701168
301	815.65	-0.445244	0.0450997
302	811.6	-0.424672	-0.254576
303	807.4	-0.404099	-0.40122
304	803.1	-0.455531	-0.398994
305	798.95	-0.506963	-0.35676	-0.690251	-0.66604	-0.171608
306	794.9	-0.558394	-0.56854
307	790.7	-0.609826	-0.372903
308	786.55	-0.630399	-0.346191
309	782.9	-0.650972	-0.380542
310	778.65	-0.548108	-0.221142	0.689458	0.721024	0.126267
311	774.4	-0.445244	-0.488672
312	770.35	-0.527535	-0.468158
313	766.4	-0.609826	-0.49678
314	762.3	-0.558394	-0.564162
315	758.25	-0.506963	-0.601238	0.81277	0.847862	0.13345
316	754	-0.527535	-0.311474
317	749.95	-0.548108	-0.501467
318	745.7	-0.537822	-0.436849
319	741.6	-0.527535	-0.46008
320	737.4	-0.496676	-0.389298	1.2492	0.917636	0.983305
321	733.15	-0.465817	-0.133898
322	729.05	-0.506963	-0.138299
323	725.55	-0.548108	-0.232295
324	721.4	-0.609826	-0.321016
325	717.05	-0.671544	-0.384948	0.315426	0.378465	-0.0101068
326	712.85	-0.527535	-0.238689
327	708.75	-0.383526	-0.1822
328	704.6	-0.455531	-0.471057
329	700.6	-0.527535	-0.212356
330	696.5	-0.455531	-0.264378	0.411542	0.33455	0.375413
331	692.45	-0.383526	-0.137982
332	688.3	-0.362953	-0.38406
333	684.2	-0.342381	-0.492686
334	680.2	-0.342381	-0.274179
335	676	-0.342381	-0.552821	6.91864e-05	-0.0125669	0.146144
336	672	-0.434958	-0.310143
337	668	-0.527535	-0.298874
338	663.75	-0.517249	-0.367873
339	659.65	-0.506963	-0.778734
340	655.6	-0.548108	-0.749506	0.785202	0.768446	0.248628
341	651.95	-0.589254	-0.402576
342	647.95	-0.630399	-0.372801
343	644	-0.671544	-0.392927
344	639.95	-0.671544	-0.411097
345	636.4	-0.671544	-0.404709	0.338524	0.386398	0.0332964
346	632.25	-0.630399	-0.4316
347	628.7	-0.589254	-0.50078
348	624.75	-0.558394	-0.326872
349	621.35	-0.527535	-0.41962
350	617.95	-0.558394	-0.429114	0.280687	0.315266	0.0579461
351	614.05	-0.589254	-0.209879
352	610.7	-0.537822	-0.492006
353	607.2	-0.48639	-0.363099
354	603.35	-0.476103	-0.187223
355	600.1	-0.465817	-0.634095	0.264388	0.278582	0.11014
356	596.95	-0.558394	-0.65902
357	593.5	-0.650972	-0.33912
358	589.8	-0.722976	-0.403261
359	586.4	-0.794981	-0.520152
360	583.3	-0.753835	-0.632195	0.233839	0.112343	0.500538
361	579.45	-0.71269	-0.591462
362	576.1	-0.578967	-0.607002
363	572.8	-0.445244	-0.605854
364	568.85	-0.537822	-0.490367
365	565.55	-0.630399	-0.490367	0.424954	0.543784	-0.124929
366	562.3	-0.578967	-0.563129
367	558.3	-0.527535	-0.704511
368	554.9	-0.568681	-0.521724
369	551.7	-0.609826	-0.609222
370	548.4	-0.620113	-0.46076	0.382111	0.489175	-0.106234
371	544.65	-0.630399	-0.44767
372	541.25	-0.640685	-0.42251
373	538.1	-0.650972	-0.47514
374	534.2	-0.609826	-0.418413
375	530.85	-0.568681	-0.437529	0.21633	0.231817	0.0989194
376	527.55	-0.609826	-0.606867
377	523.9	-0.650972	-0.727838
378	520.7	-0.650972	-0.578466
379	517.35	-0.650972	-0.711557
380	513.4	-0.661258	-0.490654	0.0878029	0.0327511	0.288538
381	510.3	-0.671544	-0.598865
382	506.95	-0.650972	-0.502294
383	503.6	-0.630399	-0.631172
384	500.35	-0.640685	-1.05008
385	496.45	-0.650972	-0.94949	-0.350679	-0.188492	-0.502175
386	493.1	-0.661258	-0.815006
387	489.85	-0.671544	-0.626027
388	486.55	-0.692117	-0.341019
389	482.8	-0.71269	-0.50505
390	479.6	-0.733263	-0.716202	-0.424629	-0.468377	0.181713
391	476.3	-0.753835	-0.377001
392	472.35	-0.692117	-0.637745
393	468.95	-0.630399	-0.853618
394	465.6	-0.640685	-0.652384
395	462.15	-0.650972	-0.503136	-0.324601	-0.185599	-0.418949
396	458.9	-0.661258	-0.580792
397	455.1	-0.671544	-0.485881
398	451.75	-0.650972	-0.704076
399	448.4	-0.630399	-0.86783
400	445.1	-0.650972	-0.688371	-0.515343	-0.468377	-0.189478
401	441.9	-0.671544	-0.815596
402	437.95	-0.671544	-0.542509
403	434.55	-0.671544	-0.590195
404	431.3	-0.537822	-0.608118
405	427.6	-0.404099	-0.816491	-0.744643	-0.305863	-1.59983
406	424.1	-0.465817	-0.734874
407	420.8	-0.527535	-0.568667
408	417.3	-0.578967	-0.696057
409	413.95	-0.630399	-0.818051
410	409.85	-0.537822	-0.838634	-0.431707	-0.276235	-0.522289
411	406.55	-0.445244	-0.872427
412	403.25	-0.527535	-0.683043
413	400.05	-0.609826	-0.824385
414	396.75	-0.702404	-0.75106
415	393.45	-0.794981	-0.818684	-0.557254	-0.464783	-0.3739
416	390.2	-0.722976	-0.677533
417	386.85	-0.650972	-0.68136
418	382.8	-0.640685	-0.764474
419	379.35	-0.630399	-0.482079
420	375.85	-0.681831	-0.704808	-0.0898997	0.0541391	-0.338544
421	371.9	-0.733263	-0.884623
422	368.3	-0.650972	-0.731094
423	364.7	-0.568681	-0.309921
424	360.7	-0.455531	-0.550049
425	357.35	-0.342381	-0.53043	0.0660092	0.501271	-0.971401
426	353.95	-0.404099	-0.654404
427	349.8	-0.465817	-0.676419
428	346.2	-0.527535	-0.738939
429	342.75	-0.589254	-0.780417
430	339.15	-0.589254	-0.818004	-0.277288	-0.198835	-0.209891
431	335.25	-0.589254	-0.852221
432	331.5	-0.59954	-0.883504
433	327.9	-0.609826	-0.912214
434	323.65	-0.609826	-0.713202
435	319.75	-0.609826	-0.779986	-0.478275	-0.478457	0.000590075
436	316.15	-0.578967	-0.728253
437	312.15	-0.548108	-0.970568
438	308.45	-0.589254	-0.896796
439	304.9	-0.630399	-1.08914
440	300.8	-0.661258	-1.09851	-0.842621	-0.785866	-0.389432
441	297.1	-0.692117	-0.99529
442	293.45	-0.661258	-0.823228
443	289.2	-0.630399	-1.06284
444	285.6	-0.692117	-1.07548
445	282.1	-0.753835	-1.18284	-0.93259	-0.78236	-0.852185
446	277.7	-0.743549	-1.15327
447	274.05	-0.733263	-1.18176
448	270.4	-0.815554	-1.03131
449	266.25	-0.897845	-1.06032
450	262.8	-0.908131	-1.25588	-0.950658	-0.95022	-0.18658
451	259.1	-0.918417	-1.07955
452	255.1	-0.928704	-1.06658
453	251.3	-0.93899	-0.977897
454	247.6	-0.93899	-1.13969
455	243.75	-0.93899	-1.06764	-1.04808	-1.07758	-0.0753564
456	239.65	-0.959563	-1.28162
457	236.35	-0.980136	-0.984514
458	232.5	-0.969849	-0.812938
459	228.3	-0.959563	-0.704791
460	224.55	-0.908131	-0.836975	-0.625615	-0.747297	0.500231
461	220.8	-0.856699	-0.751192
462	216.7	-0.815554	-0.672341
463	213.05	-0.774408	-0.834951
464	209.4	-0.815554	-0.733973
465	205.2	-0.856699	-0.560604	-0.568244	-0.437259	-0.515388
466	201.9	-0.846413	-0.631787
467	198	-0.836126	-0.702002
468	193.8	-0.774408	-0.711289
469	189.75	-0.71269	-0.735853
470	186	-0.661258	-0.872204	0.183826	-0.0663875	0.929634
471	182.5	-0.609826	-0.513638
472	178.25	-0.609826	-0.38444
473	174.55	-0.609826	-0.65479
474	171.1	-0.517249	-0.38107
475	166.9	-0.424672	-0.189748	0.714791	0.954363	-0.318243
476	163.4	-0.455531	-0.232515
477	159.8	-0.48639	-0.163213
478	155.65	-0.424672	-0.255167
479	152.05	-0.362953	-0.433679
480	148.4	-0.301235	-0.378307	0.764526	0.692185	0.379432
481	144.6	-0.239517	-0.176295
482	140.8	-0.229231	-0.423708
483	136.65	-0.218944	-0.274746
484	133.1	-0.280662	-0.0484931
485	129.3	-0.342381	-0.16349	0.513805	0.247157	0.923694
486	125.2	-0.321808	0.0502442
487	121.55	-0.301235	0.0342839
488	118.05	-0.208658	0.121662
489	113.75	-0.116081	0.219895
490	110.1	-0.126367	-0.036521	1.93803	1.20357	1.79147
491	106.6	-0.136653	0.405102
492	102.35	-0.14694	0.0254474
493	98.45	-0.157226	-0.0575689
494	94.9	-0.177799	0.222534
495	91.2	-0.198372	0.150731	0.282642	-0.174292	1.67737
496	87.3	-0.177799	0.0898358
497	83.2	-0.157226	0.0628187
498	79.75	-0.208658	0.268028
499	76.3	-0.26009	0.121348
500	72.15	-0.270376	0.262521	0.0620975	-0.35083	1.61831
501	68.5	-0.280662	0.130448
502	64.5	-0.321808	0.122481
503	60.5	-0.362953	0.070999
504	56.5	-0.332094	0.117238
505	52.5	-0.301235	0.132434	0.762849	0.165287	1.93531
506	49	-0.311522	0.124051
507	45	-0.321808	0.0233931
508	41	-0.26009	-0.0309875
509	37	-0.198372	-0.0132219
510	33	-0.249803	0.0579903	0.616813	0.0947237	1.74429
511	29.5	-0.301235	-0.149317
512	25.5	-0.301235	-0.0977959
513	21.5	-0.301235	-0.281489
514	17.5	-0.290949	-0.0923643
515	13.5	-0.280662	-0.036521	0.521256	-0.198572	2.62488
516	10	-0.229231	0.124963
517	6	-0.177799	0.297766
518	2	-0.157226	0.184153
519	-1	-0.136653	0.24564
520	-4	-0.167512	0.247075	1.2967	0.481285	2.34923
521	-6.5	-0.198372	0.153079
522	-10	-0.177799	0.192395
523	-13	-0.198372	-0.00109075	1.01152	0.148018	2.75294

## Sheet: AHC_HID
307.634	1497.18					3.125	1497.18	1	126
178.207	1497.18					1.75	1497.18	2	126
178.207	204.701					1.75	204.701	3	126
61.3917	204.701					1	204.701	4	126
61.3917	80.7673					1	0	5	126
18.0586	80.7673					1	204.701
18.0586	34.7832					2.5	204.701
7.86719	34.7832					2.5	126.539
7.86719	2.66994					2	126.539
3.71875	2.66994					2	0
3.71875	0.708956					2	126.539
1.75	0.708956					3	126.539
1.75	0.168538					3	0
1	0.168538					3	126.539
1	0					2.5	126.539
1	0.168538					2.5	204.701
2.5	0.168538					1.75	204.701
2.5	0.0414935					1.75	1497.18
2	0.0414935					4.5	1497.18
2	0					4.5	280.191
2	0.0414935					4	280.191
3	0.0414935					4	0
3	0					4	280.191
3	0.0414935					5	280.191
2.5	0.0414935					5	0
2.5	0.168538					5	280.191
1.75	0.168538					4.5	280.191
1.75	0.708956					4.5	1497.18
5.6875	0.708956					3.125	1497.18
5.6875	0.284584
4.5	0.284584
4.5	0.0265115
4	0.0265115
4	0
4	0.0265115
5	0.0265115
5	0
5	0.0265115
4.5	0.0265115
4.5	0.284584
6.875	0.284584
6.875	0.0401509
6	0.0401509
6	0
6	0.0401509
7.75	0.0401509
7.75	0.0262964
7	0.0262964
7	0
7	0.0262964
8.5	0.0262964
8.5	0.0110848
8	0.0110848
8	0
8	0.0110848
9	0.0110848
9	0
9	0.0110848
8.5	0.0110848
8.5	0.0262964
7.75	0.0262964
7.75	0.0401509
6.875	0.0401509
6.875	0.284584
5.6875	0.284584
5.6875	0.708956
3.71875	0.708956
3.71875	2.66994
12.0156	2.66994
12.0156	0.989647
10	0.989647
10	0
10	0.989647
14.0312	0.989647
14.0312	0.590503
11.75	0.590503
11.75	0.125567
11	0.125567
11	0
11	0.125567
12.5	0.125567
12.5	0.0315203
12	0.0315203
12	0
12	0.0315203
13	0.0315203
13	0
13	0.0315203
12.5	0.0315203
12.5	0.125567
11.75	0.125567
11.75	0.590503
16.3125	0.590503
16.3125	0.277407
14.75	0.277407
14.75	0.0944027
14	0.0944027
14	0
14	0.0944027
15.5	0.0944027
15.5	0.0326424
15	0.0326424
15	0
15	0.0326424
16	0.0326424
16	0
16	0.0326424
15.5	0.0326424
15.5	0.0944027
14.75	0.0944027
14.75	0.277407
17.875	0.277407
17.875	0.128332
17	0.128332
17	0
17	0.128332
18.75	0.128332
18.75	0.0479623
18	0.0479623
18	0
18	0.0479623
19.5	0.0479623
19.5	0.0229557
19	0.0229557
19	0
19	0.0229557
20	0.0229557
20	0
20	0.0229557
19.5	0.0229557
19.5	0.0479623
18.75	0.0479623
18.75	0.128332
17.875	0.128332
17.875	0.277407
16.3125	0.277407
16.3125	0.590503
14.0312	0.590503
14.0312	0.989647
12.0156	0.989647
12.0156	2.66994
7.86719	2.66994
7.86719	34.7832
28.25	34.7832
28.25	14.3075
23.9375	14.3075
23.9375	4.26835
21.75	4.26835
21.75	0.787117
21	0.787117
21	0
21	0.787117
22.5	0.787117
22.5	0.276245
22	0.276245
22	0
22	0.276245
23	0.276245
23	0
23	0.276245
22.5	0.276245
22.5	0.787117
21.75	0.787117
21.75	4.26835
26.125	4.26835
26.125	1.84875
24.75	1.84875
24.75	0.872967
24	0.872967
24	0
24	0.872967
25.5	0.872967
25.5	0.338022
25	0.338022
25	0
25	0.338022
26	0.338022
26	0
26	0.338022
25.5	0.338022
25.5	0.872967
24.75	0.872967
24.75	1.84875
27.5	1.84875
27.5	1.07248
27	1.07248
27	0
27	1.07248
28	1.07248
28	0
28	1.07248
27.5	1.07248
27.5	1.84875
26.125	1.84875
26.125	4.26835
23.9375	4.26835
23.9375	14.3075
32.5625	14.3075
32.5625	6.49811
29.875	6.49811
29.875	0.428329
29	0.428329
29	0
29	0.428329
30.75	0.428329
30.75	0.335968
30	0.335968
30	0
30	0.335968
31.5	0.335968
31.5	0.163244
31	0.163244
31	0
31	0.163244
32	0.163244
32	0
32	0.163244
31.5	0.163244
31.5	0.335968
30.75	0.335968
30.75	0.428329
29.875	0.428329
29.875	6.49811
35.25	6.49811
35.25	1.69895
33.75	1.69895
33.75	1.08183
33	1.08183
33	0
33	1.08183
34.5	1.08183
34.5	0.353907
34	0.353907
34	0
34	0.353907
35	0.353907
35	0
35	0.353907
34.5	0.353907
34.5	1.08183
33.75	1.08183
33.75	1.69895
36.75	1.69895
36.75	1.14429
36	1.14429
36	0
36	1.14429
37.5	1.14429
37.5	0.614955
37	0.614955
37	0
37	0.614955
38	0.614955
38	0
38	0.614955
37.5	0.614955
37.5	1.14429
36.75	1.14429
36.75	1.69895
35.25	1.69895
35.25	6.49811
32.5625	6.49811
32.5625	14.3075
28.25	14.3075
28.25	34.7832
18.0586	34.7832
18.0586	80.7673
104.725	80.7673
104.725	73.7438
61.9243	73.7438
61.9243	18.9685
42.3506	18.9685
42.3506	3.14893
39.75	3.14893
39.75	0.59165
39	0.59165
39	0
39	0.59165
40.5	0.59165
40.5	0.19774
40	0.19774
40	0
40	0.19774
41	0.19774
41	0
41	0.19774
40.5	0.19774
40.5	0.59165
39.75	0.59165
39.75	3.14893
44.9512	3.14893
44.9512	1.05425
42	1.05425
42	0
42	1.05425
47.9023	1.05425
47.9023	0.862409
44.6875	0.862409
44.6875	0.168599
43.5	0.168599
43.5	0.0540787
43	0.0540787
43	0
43	0.0540787
44	0.0540787
44	0
44	0.0540787
43.5	0.0540787
43.5	0.168599
45.875	0.168599
45.875	0.10818
45	0.10818
45	0
45	0.10818
46.75	0.10818
46.75	0.0771603
46	0.0771603
46	0
46	0.0771603
47.5	0.0771603
47.5	0.0497536
47	0.0497536
47	0
47	0.0497536
48	0.0497536
48	0
48	0.0497536
47.5	0.0497536
47.5	0.0771603
46.75	0.0771603
46.75	0.10818
45.875	0.10818
45.875	0.168599
44.6875	0.168599
44.6875	0.862409
51.1172	0.862409
51.1172	0.24196
49	0.24196
49	0
49	0.24196
53.2344	0.24196
53.2344	0.201251
50.75	0.201251
50.75	0.0561396
50	0.0561396
50	0
50	0.0561396
51.5	0.0561396
51.5	0.024906
51	0.024906
51	0
51	0.024906
52	0.024906
52	0
52	0.024906
51.5	0.024906
51.5	0.0561396
50.75	0.0561396
50.75	0.201251
55.7188	0.201251
55.7188	0.143214
53.75	0.143214
53.75	0.0440329
53	0.0440329
53	0
53	0.0440329
54.5	0.0440329
54.5	0.022864
54	0.022864
54	0
54	0.022864
55	0.022864
55	0
55	0.022864
54.5	0.022864
54.5	0.0440329
53.75	0.0440329
53.75	0.143214
57.6875	0.143214
57.6875	0.0637904
56.5	0.0637904
56.5	0.0189301
56	0.0189301
56	0
56	0.0189301
57	0.0189301
57	0
57	0.0189301
56.5	0.0189301
56.5	0.0637904
58.875	0.0637904
58.875	0.0287955
58	0.0287955
58	0
58	0.0287955
59.75	0.0287955
59.75	0.0158723
59	0.0158723
59	0
59	0.0158723
60.5	0.0158723
60.5	0.0147152
60	0.0147152
60	0
60	0.0147152
61	0.0147152
61	0
61	0.0147152
60.5	0.0147152
60.5	0.0158723
59.75	0.0158723
59.75	0.0287955
58.875	0.0287955
58.875	0.0637904
57.6875	0.0637904
57.6875	0.143214
55.7188	0.143214
55.7188	0.201251
53.2344	0.201251
53.2344	0.24196
51.1172	0.24196
51.1172	0.862409
47.9023	0.862409
47.9023	1.05425
44.9512	1.05425
44.9512	3.14893
42.3506	3.14893
42.3506	18.9685
81.498	18.9685
81.498	4.98226
67.6367	4.98226
67.6367	1.25538
62	1.25538
62	0
62	1.25538
73.2734	1.25538
73.2734	0.884443
67.4844	0.884443
67.4844	0.325885
65	0.325885
65	0.111306
63.5	0.111306
63.5	0.00455832
63	0.00455832
63	0
63	0.00455832
64	0.00455832
64	0
64	0.00455832
63.5	0.00455832
63.5	0.111306
66.5	0.111306
66.5	0.0226449
65.5	0.0226449
65.5	0.0107893
65	0.0107893
65	0
65	0.0107893
66	0.0107893
66	0
66	0.0107893
65.5	0.0107893
65.5	0.0226449
67.5	0.0226449
67.5	0.0172087
67	0.0172087
67	0
67	0.0172087
68	0.0172087
68	0
68	0.0172087
67.5	0.0172087
67.5	0.0226449
66.5	0.0226449
66.5	0.111306
65	0.111306
65	0.325885
69.9688	0.325885
69.9688	0.180549
69	0.180549
69	0
69	0.180549
70.9375	0.180549
70.9375	0.0817021
70	0.0817021
70	0
70	0.0817021
71.875	0.0817021
71.875	0.064868
71	0.064868
71	0
71	0.064868
72.75	0.064868
72.75	0.0456158
72	0.0456158
72	0
72	0.0456158
73.5	0.0456158
73.5	0.0169836
73	0.0169836
73	0
73	0.0169836
74	0.0169836
74	0
74	0.0169836
73.5	0.0169836
73.5	0.0456158
72.75	0.0456158
72.75	0.064868
71.875	0.064868
71.875	0.0817021
70.9375	0.0817021
70.9375	0.180549
69.9688	0.180549
69.9688	0.325885
67.4844	0.325885
67.4844	0.884443
79.0625	0.884443
79.0625	0.509074
76.625	0.509074
76.625	0.128332
75.5	0.128332
75.5	0.00921395
75	0.00921395
75	0
75	0.00921395
76	0.00921395
76	0
76	0.00921395
75.5	0.00921395
75.5	0.128332
77.75	0.128332
77.75	0.07543
77	0.07543
77	0
77	0.07543
78.5	0.07543
78.5	0.0258235
78	0.0258235
78	0
78	0.0258235
79	0.0258235
79	0
79	0.0258235
78.5	0.0258235
78.5	0.07543
77.75	0.07543
77.75	0.128332
76.625	0.128332
76.625	0.509074
81.5	0.509074
81.5	0.205008
80.5	0.205008
80.5	0.077794
80	0.077794
80	0
80	0.077794
81	0.077794
81	0
81	0.077794
80.5	0.077794
80.5	0.205008
82.5	0.205008
82.5	0.120473
82	0.120473
82	0
82	0.120473
83	0.120473
83	0
83	0.120473
82.5	0.120473
82.5	0.205008
81.5	0.205008
81.5	0.509074
79.0625	0.509074
79.0625	0.884443
73.2734	0.884443
73.2734	1.25538
67.6367	1.25538
67.6367	4.98226
95.3594	4.98226
95.3594	2.01504
86.25	2.01504
86.25	0.124282
84.75	0.124282
84.75	0.0232966
84	0.0232966
84	0
84	0.0232966
85.5	0.0232966
85.5	0.0138924
85	0.0138924
85	0
85	0.0138924
86	0.0138924
86	0
86	0.0138924
85.5	0.0138924
85.5	0.0232966
84.75	0.0232966
84.75	0.124282
87.75	0.124282
87.75	0.0787552
87	0.0787552
87	0
87	0.0787552
88.5	0.0787552
88.5	0.0307526
88	0.0307526
88	0
88	0.0307526
89	0.0307526
89	0
89	0.0307526
88.5	0.0307526
88.5	0.0787552
87.75	0.0787552
87.75	0.124282
86.25	0.124282
86.25	2.01504
104.469	2.01504
104.469	1.56003
94.25	1.56003
94.25	0.555837
91.5	0.555837
91.5	0.246523
90.5	0.246523
90.5	0.0098651
90	0.0098651
90	0
90	0.0098651
91	0.0098651
91	0
91	0.0098651
90.5	0.0098651
90.5	0.246523
92.5	0.246523
92.5	0.0898117
92	0.0898117
92	0
92	0.0898117
93	0.0898117
93	0
93	0.0898117
92.5	0.0898117
92.5	0.246523
91.5	0.246523
91.5	0.555837
97	0.555837
97	0.42957
95.5	0.42957
95.5	0.0582434
94.5	0.0582434
94.5	0.0153776
94	0.0153776
94	0
94	0.0153776
95	0.0153776
95	0
95	0.0153776
94.5	0.0153776
94.5	0.0582434
96.5	0.0582434
96.5	0.0352551
96	0.0352551
96	0
96	0.0352551
97	0.0352551
97	0
97	0.0352551
96.5	0.0352551
96.5	0.0582434
95.5	0.0582434
95.5	0.42957
98.5	0.42957
98.5	0.0721687
98	0.0721687
98	0
98	0.0721687
99	0.0721687
99	0
99	0.0721687
98.5	0.0721687
98.5	0.42957
97	0.42957
97	0.555837
94.25	0.555837
94.25	1.56003
114.688	1.56003
114.688	0.828086
108.25	0.828086
108.25	0.394658
103.969	0.394658
103.969	0.198553
100.938	0.198553
100.938	0.0614689
100	0.0614689
100	0
100	0.0614689
101.875	0.0614689
101.875	0.0553925
101	0.0553925
101	0
101	0.0553925
102.75	0.0553925
102.75	0.0184599
102	0.0184599
102	0
102	0.0184599
103.5	0.0184599
103.5	0.00443311
103	0.00443311
103	0
103	0.00443311
104	0.00443311
104	0
104	0.00443311
103.5	0.00443311
103.5	0.0184599
102.75	0.0184599
102.75	0.0553925
101.875	0.0553925
101.875	0.0614689
100.938	0.0614689
100.938	0.198553
107	0.198553
107	0.085148
105.5	0.085148
105.5	0.0110553
105	0.0110553
105	0
105	0.0110553
106	0.0110553
106	0
106	0.0110553
105.5	0.0110553
105.5	0.085148
108.5	0.085148
108.5	0.0290936
107.5	0.0290936
107.5	0.00843845
107	0.00843845
107	0
107	0.00843845
108	0.00843845
108	0
108	0.00843845
107.5	0.00843845
107.5	0.0290936
109.5	0.0290936
109.5	0.0153755
109	0.0153755
109	0
109	0.0153755
110	0.0153755
110	0
110	0.0153755
109.5	0.0153755
109.5	0.0290936
108.5	0.0290936
108.5	0.085148
107	0.085148
107	0.198553
103.969	0.198553
103.969	0.394658
112.531	0.394658
112.531	0.22074
111	0.22074
111	0
111	0.22074
114.062	0.22074
114.062	0.140171
112.5	0.140171
112.5	0.032195
112	0.032195
112	0
112	0.032195
113	0.032195
113	0
113	0.032195
112.5	0.032195
112.5	0.140171
115.625	0.140171
115.625	0.116189
114.5	0.116189
114.5	0.0334498
114	0.0334498
114	0
114	0.0334498
115	0.0334498
115	0
115	0.0334498
114.5	0.0334498
114.5	0.116189
116.75	0.116189
116.75	0.0445416
116	0.0445416
116	0
116	0.0445416
117.5	0.0445416
117.5	0.016071
117	0.016071
117	0
117	0.016071
118	0.016071
118	0
118	0.016071
117.5	0.016071
117.5	0.0445416
116.75	0.0445416
116.75	0.116189
115.625	0.116189
115.625	0.140171
114.062	0.140171
114.062	0.22074
112.531	0.22074
112.531	0.394658
108.25	0.394658
108.25	0.828086
121.125	0.828086
121.125	0.70273
119.75	0.70273
119.75	0.0837217
119	0.0837217
119	0
119	0.0837217
120.5	0.0837217
120.5	0.016544
120	0.016544
120	0
120	0.016544
121	0.016544
121	0
121	0.016544
120.5	0.016544
120.5	0.0837217
119.75	0.0837217
119.75	0.70273
122.5	0.70273
122.5	0.0900073
122	0.0900073
122	0
122	0.0900073
123	0.0900073
123	0
123	0.0900073
122.5	0.0900073
122.5	0.70273
121.125	0.70273
121.125	0.828086
114.688	0.828086
114.688	1.56003
104.469	1.56003
104.469	2.01504
95.3594	2.01504
95.3594	4.98226
81.498	4.98226
81.498	18.9685
61.9243	18.9685
61.9243	73.7438
147.525	73.7438
147.525	30.8843
134.562	30.8843
134.562	7.44774
128.375	7.44774
128.375	1.80831
126	1.80831
126	0.523851
124.5	0.523851
124.5	0.0258118
124	0.0258118
124	0
124	0.0258118
125	0.0258118
125	0
125	0.0258118
124.5	0.0258118
124.5	0.523851
127.5	0.523851
127.5	0.407018
126.5	0.407018
126.5	0.101353
126	0.101353
126	0
126	0.101353
127	0.101353
127	0
127	0.101353
126.5	0.101353
126.5	0.407018
128.5	0.407018
128.5	0.107023
128	0.107023
128	0
128	0.107023
129	0.107023
129	0
129	0.107023
128.5	0.107023
128.5	0.407018
127.5	0.407018
127.5	0.523851
126	0.523851
126	1.80831
130.75	1.80831
130.75	0.543664
130	0.543664
130	0
130	0.543664
131.5	0.543664
131.5	0.218428
131	0.218428
131	0
131	0.218428
132	0.218428
132	0
132	0.218428
131.5	0.218428
131.5	0.543664
130.75	0.543664
130.75	1.80831
128.375	1.80831
128.375	7.44774
140.75	7.44774
140.75	5.5767
136.75	5.5767
136.75	0.964027
133.875	0.964027
133.875	0.101198
133	0.101198
133	0
133	0.101198
134.75	0.101198
134.75	0.0391105
134	0.0391105
134	0
134	0.0391105
135.5	0.0391105
135.5	0.0199965
135	0.0199965
135	0
135	0.0199965
136	0.0199965
136	0
136	0.0199965
135.5	0.0199965
135.5	0.0391105
134.75	0.0391105
134.75	0.101198
133.875	0.101198
133.875	0.964027
139.625	0.964027
139.625	0.255194
137.75	0.255194
137.75	0.0871437
137	0.0871437
137	0
137	0.0871437
138.5	0.0871437
138.5	0.0155725
138	0.0155725
138	0
138	0.0155725
139	0.0155725
139	0
139	0.0155725
138.5	0.0155725
138.5	0.0871437
137.75	0.0871437
137.75	0.255194
141.5	0.255194
141.5	0.103459
140.5	0.103459
140.5	0.0292184
140	0.0292184
140	0
140	0.0292184
141	0.0292184
141	0
141	0.0292184
140.5	0.0292184
140.5	0.103459
142.5	0.103459
142.5	0.0464811
142	0.0464811
142	0
142	0.0464811
143	0.0464811
143	0
143	0.0464811
142.5	0.0464811
142.5	0.103459
141.5	0.103459
141.5	0.255194
139.625	0.255194
139.625	0.964027
136.75	0.964027
136.75	5.5767
144.75	5.5767
144.75	1.9852
144	1.9852
144	0
144	1.9852
145.5	1.9852
145.5	0.0900146
145	0.0900146
145	0
145	0.0900146
146	0.0900146
146	0
146	0.0900146
145.5	0.0900146
145.5	1.9852
144.75	1.9852
144.75	5.5767
140.75	5.5767
140.75	7.44774
134.562	7.44774
134.562	30.8843
160.488	30.8843
160.488	12.9903
151.469	12.9903
151.469	5.63965
147.938	5.63965
147.938	0.641777
147	0.641777
147	0
147	0.641777
148.875	0.641777
148.875	0.236892
148	0.236892
148	0
148	0.236892
149.75	0.236892
149.75	0.114295
149	0.114295
149	0
149	0.114295
150.5	0.114295
150.5	0.0578306
150	0.0578306
150	0
150	0.0578306
151	0.0578306
151	0
151	0.0578306
150.5	0.0578306
150.5	0.114295
149.75	0.114295
149.75	0.236892
148.875	0.236892
148.875	0.641777
147.938	0.641777
147.938	5.63965
155	5.63965
155	3.53715
152.75	3.53715
152.75	0.391497
152	0.391497
152	0
152	0.391497
153.5	0.391497
153.5	0.197281
153	0.197281
153	0
153	0.197281
154	0.197281
154	0
154	0.197281
153.5	0.197281
153.5	0.391497
152.75	0.391497
152.75	3.53715
157.25	3.53715
157.25	0.859188
155.75	0.859188
155.75	0.25797
155	0.25797
155	0
155	0.25797
156.5	0.25797
156.5	0.0711931
156	0.0711931
156	0
156	0.0711931
157	0.0711931
157	0
157	0.0711931
156.5	0.0711931
156.5	0.25797
155.75	0.25797
155.75	0.859188
158.75	0.859188
158.75	0.694981
158	0.694981
158	0
158	0.694981
159.5	0.694981
159.5	0.0242067
159	0.0242067
159	0
159	0.0242067
160	0.0242067
160	0
160	0.0242067
159.5	0.0242067
159.5	0.694981
158.75	0.694981
158.75	0.859188
157.25	0.859188
157.25	3.53715
155	3.53715
155	5.63965
151.469	5.63965
151.469	12.9903
169.508	12.9903
169.508	6.72796
163	6.72796
163	0.814512
161.5	0.814512
161.5	0.17199
161	0.17199
161	0
161	0.17199
162	0.17199
162	0
162	0.17199
161.5	0.17199
161.5	0.814512
164.5	0.814512
164.5	0.55216
163.5	0.55216
163.5	0.11973
163	0.11973
163	0
163	0.11973
164	0.11973
164	0
164	0.11973
163.5	0.11973
163.5	0.55216
165.5	0.55216
165.5	0.210359
165	0.210359
165	0
165	0.210359
166	0.210359
166	0
166	0.210359
165.5	0.210359
165.5	0.55216
164.5	0.55216
164.5	0.814512
163	0.814512
163	6.72796
176.016	6.72796
176.016	2.60464
170.531	2.60464
170.531	0.971491
167.875	0.971491
167.875	0.15564
167	0.15564
167	0
167	0.15564
168.75	0.15564
168.75	0.0777633
168	0.0777633
168	0
168	0.0777633
169.5	0.0777633
169.5	0.0353959
169	0.0353959
169	0
169	0.0353959
170	0.0353959
170	0
170	0.0353959
169.5	0.0353959
169.5	0.0777633
168.75	0.0777633
168.75	0.15564
167.875	0.15564
167.875	0.971491
173.188	0.971491
173.188	0.498671
171.5	0.498671
171.5	0.140482
171	0.140482
171	0
171	0.140482
172	0.140482
172	0
172	0.140482
171.5	0.140482
171.5	0.498671
174.875	0.498671
174.875	0.310379
173.5	0.310379
173.5	0.0578039
173	0.0578039
173	0
173	0.0578039
174	0.0578039
174	0
174	0.0578039
173.5	0.0578039
173.5	0.310379
176.25	0.310379
176.25	0.166975
175	0.166975
175	0
175	0.166975
177.5	0.166975
177.5	0.0642123
176.5	0.0642123
176.5	0.00582966
176	0.00582966
176	0
176	0.00582966
177	0.00582966
177	0
177	0.00582966
176.5	0.00582966
176.5	0.0642123
178.5	0.0642123
178.5	0.05307
178	0.05307
178	0
178	0.05307
179	0.05307
179	0
179	0.05307
178.5	0.05307
178.5	0.0642123
177.5	0.0642123
177.5	0.166975
176.25	0.166975
176.25	0.310379
174.875	0.310379
174.875	0.498671
173.188	0.498671
173.188	0.971491
170.531	0.971491
170.531	2.60464
181.5	2.60464
181.5	2.10471
180	2.10471
180	0
180	2.10471
183	2.10471
183	0.378105
181.5	0.378105
181.5	0.0797102
181	0.0797102
181	0
181	0.0797102
182	0.0797102
182	0
182	0.0797102
181.5	0.0797102
181.5	0.378105
184.5	0.378105
184.5	0.295969
183.5	0.295969
183.5	0.0347639
183	0.0347639
183	0
183	0.0347639
184	0.0347639
184	0
184	0.0347639
183.5	0.0347639
183.5	0.295969
185.5	0.295969
185.5	0.0499744
185	0.0499744
185	0
185	0.0499744
186	0.0499744
186	0
186	0.0499744
185.5	0.0499744
185.5	0.295969
184.5	0.295969
184.5	0.378105
183	0.378105
183	2.10471
181.5	2.10471
181.5	2.60464
176.016	2.60464
176.016	6.72796
169.508	6.72796
169.508	12.9903
160.488	12.9903
160.488	30.8843
147.525	30.8843
147.525	73.7438
104.725	73.7438
104.725	80.7673
61.3917	80.7673
61.3917	204.701
295.021	204.701
295.021	126.539
219.302	126.539
219.302	36.1779
191.531	36.1779
191.531	6.44494
187.938	6.44494
187.938	2.63206
187	2.63206
187	0
187	2.63206
188.875	2.63206
188.875	1.67144
188	1.67144
188	0
188	1.67144
189.75	1.67144
189.75	0.368342
189	0.368342
189	0
189	0.368342
190.5	0.368342
190.5	0.146411
190	0.146411
190	0
190	0.146411
191	0.146411
191	0
191	0.146411
190.5	0.146411
190.5	0.368342
189.75	0.368342
189.75	1.67144
188.875	1.67144
188.875	2.63206
187.938	2.63206
187.938	6.44494
195.125	6.44494
195.125	3.23176
193.5	3.23176
193.5	0.574652
192.5	0.574652
192.5	0.143599
192	0.143599
192	0
192	0.143599
193	0.143599
193	0
193	0.143599
192.5	0.143599
192.5	0.574652
194.5	0.574652
194.5	0.299806
194	0.299806
194	0
194	0.299806
195	0.299806
195	0
195	0.299806
194.5	0.299806
194.5	0.574652
193.5	0.574652
193.5	3.23176
196.75	3.23176
196.75	0.874098
196	0.874098
196	0
196	0.874098
197.5	0.874098
197.5	0.210217
197	0.210217
197	0
197	0.210217
198	0.210217
198	0
198	0.210217
197.5	0.210217
197.5	0.874098
196.75	0.874098
196.75	3.23176
195.125	3.23176
195.125	6.44494
191.531	6.44494
191.531	36.1779
247.073	36.1779
247.073	30.5959
223.518	30.5959
223.518	8.44158
209.617	8.44158
209.617	2.18729
202.031	2.18729
202.031	0.872967
199.75	0.872967
199.75	0.124315
199	0.124315
199	0
199	0.124315
200.5	0.124315
200.5	0.0421128
200	0.0421128
200	0
200	0.0421128
201	0.0421128
201	0
201	0.0421128
200.5	0.0421128
200.5	0.124315
199.75	0.124315
199.75	0.872967
204.312	0.872967
204.312	0.374982
202.75	0.374982
202.75	0.0682696
202	0.0682696
202	0
202	0.0682696
203.5	0.0682696
203.5	0.0133457
203	0.0133457
203	0
203	0.0133457
204	0.0133457
204	0
204	0.0133457
203.5	0.0133457
203.5	0.0682696
202.75	0.0682696
202.75	0.374982
205.875	0.374982
205.875	0.17453
205	0.17453
205	0
205	0.17453
206.75	0.17453
206.75	0.0649857
206	0.0649857
206	0
206	0.0649857
207.5	0.0649857
207.5	0.0349257
207	0.0349257
207	0
207	0.0349257
208	0.0349257
208	0
208	0.0349257
207.5	0.0349257
207.5	0.0649857
206.75	0.0649857
206.75	0.17453
205.875	0.17453
205.875	0.374982
204.312	0.374982
204.312	0.872967
202.031	0.872967
202.031	2.18729
217.203	2.18729
217.203	1.55315
212.594	1.55315
212.594	0.230625
210.5	0.230625
210.5	0.0987745
209.5	0.0987745
209.5	0.0259308
209	0.0259308
209	0
209	0.0259308
210	0.0259308
210	0
210	0.0259308
209.5	0.0259308
209.5	0.0987745
211.5	0.0987745
211.5	0.0260782
211	0.0260782
211	0
211	0.0260782
212	0.0260782
212	0
212	0.0260782
211.5	0.0260782
211.5	0.0987745
210.5	0.0987745
210.5	0.230625
214.688	0.230625
214.688	0.129205
213.5	0.129205
213.5	0.0309703
213	0.0309703
213	0
213	0.0309703
214	0.0309703
214	0
214	0.0309703
213.5	0.0309703
213.5	0.129205
215.875	0.129205
215.875	0.0613281
215	0.0613281
215	0
215	0.0613281
216.75	0.0613281
216.75	0.0341663
216	0.0341663
216	0
216	0.0341663
217.5	0.0341663
217.5	0.0100644
217	0.0100644
217	0
217	0.0100644
218	0.0100644
218	0
218	0.0100644
217.5	0.0100644
217.5	0.0341663
216.75	0.0341663
216.75	0.0613281
215.875	0.0613281
215.875	0.129205
214.688	0.129205
214.688	0.230625
212.594	0.230625
212.594	1.55315
221.812	1.55315
221.812	0.298296
219.875	0.298296
219.875	0.0798797
219	0.0798797
219	0
219	0.0798797
220.75	0.0798797
220.75	0.0485094
220	0.0485094
220	0
220	0.0485094
221.5	0.0485094
221.5	0.0295494
221	0.0295494
221	0
221	0.0295494
222	0.0295494
222	0
222	0.0295494
221.5	0.0295494
221.5	0.0485094
220.75	0.0485094
220.75	0.0798797
219.875	0.0798797
219.875	0.298296
223.75	0.298296
223.75	0.149292
223	0.149292
223	0
223	0.149292
224.5	0.149292
224.5	0.0348963
224	0.0348963
224	0
224	0.0348963
225	0.0348963
225	0
225	0.0348963
224.5	0.0348963
224.5	0.149292
223.75	0.149292
223.75	0.298296
221.812	0.298296
221.812	1.55315
217.203	1.55315
217.203	2.18729
209.617	2.18729
209.617	8.44158
237.418	8.44158
237.418	4.90048
231.312	4.90048
231.312	1.25172
227.25	1.25172
227.25	0.468186
226	0.468186
226	0
226	0.468186
228.5	0.468186
228.5	0.18946
227.5	0.18946
227.5	0.0230198
227	0.0230198
227	0
227	0.0230198
228	0.0230198
228	0
228	0.0230198
227.5	0.0230198
227.5	0.18946
229.5	0.18946
229.5	0.033942
229	0.033942
229	0
229	0.033942
230	0.033942
230	0
230	0.033942
229.5	0.033942
229.5	0.18946
228.5	0.18946
228.5	0.468186
227.25	0.468186
227.25	1.25172
235.375	1.25172
235.375	0.868483
233.125	0.868483
233.125	0.158768
231.75	0.158768
231.75	0.0581277
231	0.0581277
231	0
231	0.0581277
232.5	0.0581277
232.5	0.0126391
232	0.0126391
232	0
232	0.0126391
233	0.0126391
233	0
233	0.0126391
232.5	0.0126391
232.5	0.0581277
231.75	0.0581277
231.75	0.158768
234.5	0.158768
234.5	0.0878001
234	0.0878001
234	0
234	0.0878001
235	0.0878001
235	0
235	0.0878001
234.5	0.0878001
234.5	0.158768
233.125	0.158768
233.125	0.868483
237.625	0.868483
237.625	0.452442
236.5	0.452442
236.5	0.109966
236	0.109966
236	0
236	0.109966
237	0.109966
237	0
237	0.109966
236.5	0.109966
236.5	0.452442
238.75	0.452442
238.75	0.155933
238	0.155933
238	0
238	0.155933
239.5	0.155933
239.5	0.073196
239	0.073196
239	0
239	0.073196
240	0.073196
240	0
240	0.073196
239.5	0.073196
239.5	0.155933
238.75	0.155933
238.75	0.452442
237.625	0.452442
237.625	0.868483
235.375	0.868483
235.375	1.25172
231.312	1.25172
231.312	4.90048
243.523	4.90048
243.523	1.8154
241.5	1.8154
241.5	0.335397
241	0.335397
241	0
241	0.335397
242	0.335397
242	0
242	0.335397
241.5	0.335397
241.5	1.8154
245.547	1.8154
245.547	0.850308
243.75	0.850308
243.75	0.372975
243	0.372975
243	0
243	0.372975
244.5	0.372975
244.5	0.0780059
244	0.0780059
244	0
244	0.0780059
245	0.0780059
245	0
245	0.0780059
244.5	0.0780059
244.5	0.372975
243.75	0.372975
243.75	0.850308
247.344	0.850308
247.344	0.631633
246	0.631633
246	0
246	0.631633
248.688	0.631633
248.688	0.431314
247.5	0.431314
247.5	0.0888484
247	0.0888484
247	0
247	0.0888484
248	0.0888484
248	0
248	0.0888484
247.5	0.0888484
247.5	0.431314
249.875	0.431314
249.875	0.135569
249	0.135569
249	0
249	0.135569
250.75	0.135569
250.75	0.0767216
250	0.0767216
250	0
250	0.0767216
251.5	0.0767216
251.5	0.0408309
251	0.0408309
251	0
251	0.0408309
252	0.0408309
252	0
252	0.0408309
251.5	0.0408309
251.5	0.0767216
250.75	0.0767216
250.75	0.135569
249.875	0.135569
249.875	0.431314
248.688	0.431314
248.688	0.631633
247.344	0.631633
247.344	0.850308
245.547	0.850308
245.547	1.8154
243.523	1.8154
243.523	4.90048
237.418	4.90048
237.418	8.44158
223.518	8.44158
223.518	30.5959
270.629	30.5959
270.629	10.2413
260.039	10.2413
260.039	2.57563
255.594	2.57563
255.594	0.442578
253.5	0.442578
253.5	0.0648469
253	0.0648469
253	0
253	0.0648469
254	0.0648469
254	0
254	0.0648469
253.5	0.0648469
253.5	0.442578
257.688	0.442578
257.688	0.32453
255.875	0.32453
255.875	0.0778862
255	0.0778862
255	0
255	0.0778862
256.75	0.0778862
256.75	0.0140827
256	0.0140827
256	0
256	0.0140827
257.5	0.0140827
257.5	0.0102578
257	0.0102578
257	0
257	0.0102578
258	0.0102578
258	0
258	0.0102578
257.5	0.0102578
257.5	0.0140827
256.75	0.0140827
256.75	0.0778862
255.875	0.0778862
255.875	0.32453
259.5	0.32453
259.5	0.0958425
259	0.0958425
259	0
259	0.0958425
260	0.0958425
260	0
260	0.0958425
259.5	0.0958425
259.5	0.32453
257.688	0.32453
257.688	0.442578
255.594	0.442578
255.594	2.57563
264.484	2.57563
264.484	1.08912
261.75	1.08912
261.75	0.201368
261	0.201368
261	0
261	0.201368
262.5	0.201368
262.5	0.0991858
262	0.0991858
262	0
262	0.0991858
263	0.0991858
263	0
263	0.0991858
262.5	0.0991858
262.5	0.201368
261.75	0.201368
261.75	1.08912
267.219	1.08912
267.219	0.378377
264.5	0.378377
264.5	0.053166
264	0.053166
264	0
264	0.053166
265	0.053166
265	0
265	0.053166
264.5	0.053166
264.5	0.378377
269.938	0.378377
269.938	0.155203
268.125	0.155203
268.125	0.0724077
266.75	0.0724077
266.75	0.00777146
266	0.00777146
266	0
266	0.00777146
267.5	0.00777146
267.5	0.00284106
267	0.00284106
267	0
267	0.00284106
268	0.00284106
268	0
268	0.00284106
267.5	0.00284106
267.5	0.00777146
266.75	0.00777146
266.75	0.0724077
269.5	0.0724077
269.5	0.018502
269	0.018502
269	0
269	0.018502
270	0.018502
270	0
270	0.018502
269.5	0.018502
269.5	0.0724077
268.125	0.0724077
268.125	0.155203
271.75	0.155203
271.75	0.124183
271	0.124183
271	0
271	0.124183
272.5	0.124183
272.5	0.0191116
272	0.0191116
272	0
272	0.0191116
273	0.0191116
273	0
273	0.0191116
272.5	0.0191116
272.5	0.124183
271.75	0.124183
271.75	0.155203
269.938	0.155203
269.938	0.378377
267.219	0.378377
267.219	1.08912
264.484	1.08912
264.484	2.57563
260.039	2.57563
260.039	10.2413
281.219	10.2413
281.219	2.98298
276	2.98298
276	0.864392
274.5	0.864392
274.5	0.263066
274	0.263066
274	0
274	0.263066
275	0.263066
275	0
275	0.263066
274.5	0.263066
274.5	0.864392
277.5	0.864392
277.5	0.457495
276.5	0.457495
276.5	0.0936264
276	0.0936264
276	0
276	0.0936264
277	0.0936264
277	0
277	0.0936264
276.5	0.0936264
276.5	0.457495
278.5	0.457495
278.5	0.166061
278	0.166061
278	0
278	0.166061
279	0.166061
279	0
279	0.166061
278.5	0.166061
278.5	0.457495
277.5	0.457495
277.5	0.864392
276	0.864392
276	2.98298
286.438	2.98298
286.438	1.56345
283	1.56345
283	0.999614
281.5	0.999614
281.5	0.141268
280.5	0.141268
280.5	0.0359487
280	0.0359487
280	0
280	0.0359487
281	0.0359487
281	0
281	0.0359487
280.5	0.0359487
280.5	0.141268
282.5	0.141268
282.5	0.128338
282	0.128338
282	0
282	0.128338
283	0.128338
283	0
283	0.128338
282.5	0.128338
282.5	0.141268
281.5	0.141268
281.5	0.999614
284.5	0.999614
284.5	0.144815
284	0.144815
284	0
284	0.144815
285	0.144815
285	0
285	0.144815
284.5	0.144815
284.5	0.999614
283	0.999614
283	1.56345
289.875	1.56345
289.875	1.15412
287.5	1.15412
287.5	0.208909
286.5	0.208909
286.5	0.0325835
286	0.0325835
286	0
286	0.0325835
287	0.0325835
287	0
287	0.0325835
286.5	0.0325835
286.5	0.208909
[truncated: 1,655 more rows]

## Sheet: AHC_HID1
309.662	1484.5					3.125	1484.5	1	138
178.002	1484.5					1.75	1484.5	2	138
178.002	166.22					1.75	166.22	3	138
51.1835	166.22					1	166.22	4	138
51.1835	93.1154					1	0	5	138
16.7656	93.1154					1	166.22
16.7656	8.58787					2.5	166.22
9.625	8.58787					2.5	141.909
9.625	1.64567					2	141.909
5.15625	1.64567					2	0
5.15625	0.778177					2	141.909
2.625	0.778177					3	141.909
2.625	0.0461045					3	0
1.5	0.0461045					3	141.909
1.5	0.010854					2.5	141.909
1	0.010854					2.5	166.22
1	0					1.75	166.22
1	0.010854					1.75	1484.5
2	0.010854					4.5	1484.5
2	0					4.5	264.169
2	0.010854					4	264.169
1.5	0.010854					4	0
1.5	0.0461045					4	264.169
3.75	0.0461045					5	264.169
3.75	0.0362173					5	0
3	0.0362173					5	264.169
3	0					4.5	264.169
3	0.0362173					4.5	1484.5
4.5	0.0362173					3.125	1484.5
4.5	0.0110688
4	0.0110688
4	0
4	0.0110688
5	0.0110688
5	0
5	0.0110688
4.5	0.0110688
4.5	0.0362173
3.75	0.0362173
3.75	0.0461045
2.625	0.0461045
2.625	0.778177
7.6875	0.778177
7.6875	0.28122
6.5	0.28122
6.5	0.0245133
6	0.0245133
6	0
6	0.0245133
7	0.0245133
7	0
7	0.0245133
6.5	0.0245133
6.5	0.28122
8.875	0.28122
8.875	0.151825
8	0.151825
8	0
8	0.151825
9.75	0.151825
9.75	0.0483471
9	0.0483471
9	0
9	0.0483471
10.5	0.0483471
10.5	0.0223094
10	0.0223094
10	0
10	0.0223094
11	0.0223094
11	0
11	0.0223094
10.5	0.0223094
10.5	0.0483471
9.75	0.0483471
9.75	0.151825
8.875	0.151825
8.875	0.28122
7.6875	0.28122
7.6875	0.778177
5.15625	0.778177
5.15625	1.64567
14.0938	1.64567
14.0938	0.80643
12	0.80643
12	0
12	0.80643
16.1875	0.80643
16.1875	0.293809
13.875	0.293809
13.875	0.113992
13	0.113992
13	0
13	0.113992
14.75	0.113992
14.75	0.0455817
14	0.0455817
14	0
14	0.0455817
15.5	0.0455817
15.5	0.0229054
15	0.0229054
15	0
15	0.0229054
16	0.0229054
16	0
16	0.0229054
15.5	0.0229054
15.5	0.0455817
14.75	0.0455817
14.75	0.113992
13.875	0.113992
13.875	0.293809
18.5	0.293809
18.5	0.115566
17.5	0.115566
17.5	0.0255667
17	0.0255667
17	0
17	0.0255667
18	0.0255667
18	0
18	0.0255667
17.5	0.0255667
17.5	0.115566
19.5	0.115566
19.5	0.0315678
19	0.0315678
19	0
19	0.0315678
20	0.0315678
20	0
20	0.0315678
19.5	0.0315678
19.5	0.115566
18.5	0.115566
18.5	0.293809
16.1875	0.293809
16.1875	0.80643
14.0938	0.80643
14.0938	1.64567
9.625	1.64567
9.625	8.58787
23.9062	8.58787
23.9062	1.74038
21.5	1.74038
21.5	0.549426
21	0.549426
21	0
21	0.549426
22	0.549426
22	0
22	0.549426
21.5	0.549426
21.5	1.74038
26.3125	1.74038
26.3125	1.53259
23.75	1.53259
23.75	0.349901
23	0.349901
23	0
23	0.349901
24.5	0.349901
24.5	0.0548739
24	0.0548739
24	0
24	0.0548739
25	0.0548739
25	0
25	0.0548739
24.5	0.0548739
24.5	0.349901
23.75	0.349901
23.75	1.53259
28.875	1.53259
28.875	0.725694
26.875	0.725694
26.875	0.139788
26	0.139788
26	0
26	0.139788
27.75	0.139788
27.75	0.0631328
27	0.0631328
27	0
27	0.0631328
28.5	0.0631328
28.5	0.0510554
28	0.0510554
28	0
28	0.0510554
29	0.0510554
29	0
29	0.0510554
28.5	0.0510554
28.5	0.0631328
27.75	0.0631328
27.75	0.139788
26.875	0.139788
26.875	0.725694
30.875	0.725694
30.875	0.207167
30	0.207167
30	0
30	0.207167
31.75	0.207167
31.75	0.0396462
31	0.0396462
31	0
31	0.0396462
32.5	0.0396462
32.5	0.0330561
32	0.0330561
32	0
32	0.0330561
33	0.0330561
33	0
33	0.0330561
32.5	0.0330561
32.5	0.0396462
31.75	0.0396462
31.75	0.207167
30.875	0.207167
30.875	0.725694
28.875	0.725694
28.875	1.53259
26.3125	1.53259
26.3125	1.74038
23.9062	1.74038
23.9062	8.58787
16.7656	8.58787
16.7656	93.1154
85.6013	93.1154
85.6013	64.1592
44.8281	64.1592
44.8281	11.6561
37.5938	11.6561
37.5938	2.87836
35.5	2.87836
35.5	0.695725
34.5	0.695725
34.5	0.0354528
34	0.0354528
34	0
34	0.0354528
35	0.0354528
35	0
35	0.0354528
34.5	0.0354528
34.5	0.695725
36.5	0.695725
36.5	0.177735
36	0.177735
36	0
36	0.177735
37	0.177735
37	0
37	0.177735
36.5	0.177735
36.5	0.695725
35.5	0.695725
35.5	2.87836
39.6875	2.87836
39.6875	1.15913
38.5	1.15913
38.5	0.0191081
38	0.0191081
38	0
38	0.0191081
39	0.0191081
39	0
39	0.0191081
38.5	0.0191081
38.5	1.15913
40.875	1.15913
40.875	0.333525
40	0.333525
40	0
40	0.333525
41.75	0.333525
41.75	0.239042
41	0.239042
41	0
41	0.239042
42.5	0.239042
42.5	0.0594374
42	0.0594374
42	0
42	0.0594374
43	0.0594374
43	0
43	0.0594374
42.5	0.0594374
42.5	0.239042
41.75	0.239042
41.75	0.333525
40.875	0.333525
40.875	1.15913
39.6875	1.15913
39.6875	2.87836
37.5938	2.87836
37.5938	11.6561
52.0625	11.6561
52.0625	7.45182
46.375	7.45182
46.375	0.557614
44.5	0.557614
44.5	0.0252135
44	0.0252135
44	0
44	0.0252135
45	0.0252135
45	0
45	0.0252135
44.5	0.0252135
44.5	0.557614
48.25	0.557614
48.25	0.388279
46.75	0.388279
46.75	0.143887
46	0.143887
46	0
46	0.143887
47.5	0.143887
47.5	0.0222753
47	0.0222753
47	0
47	0.0222753
48	0.0222753
48	0
48	0.0222753
47.5	0.0222753
47.5	0.143887
46.75	0.143887
46.75	0.388279
49.75	0.388279
49.75	0.181155
49	0.181155
49	0
49	0.181155
50.5	0.181155
50.5	0.013477
50	0.013477
50	0
50	0.013477
51	0.013477
51	0
51	0.013477
50.5	0.013477
50.5	0.181155
49.75	0.181155
49.75	0.388279
48.25	0.388279
48.25	0.557614
46.375	0.557614
46.375	7.45182
57.75	7.45182
57.75	1.51114
53.875	1.51114
53.875	0.183183
52.5	0.183183
52.5	0.0476362
52	0.0476362
52	0
52	0.0476362
53	0.0476362
53	0
53	0.0476362
52.5	0.0476362
52.5	0.183183
55.25	0.183183
55.25	0.0823768
54	0.0823768
54	0
54	0.0823768
56.5	0.0823768
56.5	0.0378861
55.5	0.0378861
55.5	0.00952147
55	0.00952147
55	0
55	0.00952147
56	0.00952147
56	0
56	0.00952147
55.5	0.00952147
55.5	0.0378861
57.5	0.0378861
57.5	0.0177066
57	0.0177066
57	0
57	0.0177066
58	0.0177066
58	0
58	0.0177066
57.5	0.0177066
57.5	0.0378861
56.5	0.0378861
56.5	0.0823768
55.25	0.0823768
55.25	0.183183
53.875	0.183183
53.875	1.51114
61.625	1.51114
61.625	0.240262
59.75	0.240262
59.75	0.0425233
59	0.0425233
59	0
59	0.0425233
60.5	0.0425233
60.5	0.023112
60	0.023112
60	0
60	0.023112
61	0.023112
61	0
61	0.023112
60.5	0.023112
60.5	0.0425233
59.75	0.0425233
59.75	0.240262
63.5	0.240262
63.5	0.0808821
62.5	0.0808821
62.5	0.0155034
62	0.0155034
62	0
62	0.0155034
63	0.0155034
63	0
63	0.0155034
62.5	0.0155034
62.5	0.0808821
64.5	0.0808821
64.5	0.046277
64	0.046277
64	0
64	0.046277
65	0.046277
65	0
65	0.046277
64.5	0.046277
64.5	0.0808821
63.5	0.0808821
63.5	0.240262
61.625	0.240262
61.625	1.51114
57.75	1.51114
57.75	7.45182
52.0625	7.45182
52.0625	11.6561
44.8281	11.6561
44.8281	64.1592
126.375	64.1592
126.375	58.6997
91.5088	58.6997
91.5088	17.6116
74.8477	17.6116
74.8477	1.24691
68.375	1.24691
68.375	0.218312
66.5	0.218312
66.5	0.0393875
66	0.0393875
66	0
66	0.0393875
67	0.0393875
67	0
67	0.0393875
66.5	0.0393875
66.5	0.218312
70.25	0.218312
70.25	0.17988
68.75	0.17988
68.75	0.0805702
68	0.0805702
68	0
68	0.0805702
69.5	0.0805702
69.5	0.0546906
69	0.0546906
69	0
69	0.0546906
70	0.0546906
70	0
70	0.0546906
69.5	0.0546906
69.5	0.0805702
68.75	0.0805702
68.75	0.17988
71.75	0.17988
71.75	0.0869545
71	0.0869545
71	0
71	0.0869545
72.5	0.0869545
72.5	0.0476864
72	0.0476864
72	0
72	0.0476864
73	0.0476864
73	0
73	0.0476864
72.5	0.0476864
72.5	0.0869545
71.75	0.0869545
71.75	0.17988
70.25	0.17988
70.25	0.218312
68.375	0.218312
68.375	1.24691
81.3203	1.24691
81.3203	0.359251
76.7031	0.359251
76.7031	0.192024
74.75	0.192024
74.75	0.0561126
74	0.0561126
74	0
74	0.0561126
75.5	0.0561126
75.5	0.0216493
75	0.0216493
75	0
75	0.0216493
76	0.0216493
76	0
76	0.0216493
75.5	0.0216493
75.5	0.0561126
74.75	0.0561126
74.75	0.192024
78.6562	0.192024
78.6562	0.0753761
77	0.0753761
77	0
77	0.0753761
80.3125	0.0753761
80.3125	0.0516191
78.5	0.0516191
78.5	0.0072847
78	0.0072847
78	0
78	0.0072847
79	0.0072847
79	0
79	0.0072847
78.5	0.0072847
78.5	0.0516191
82.125	0.0516191
82.125	0.038428
80.75	0.038428
80.75	0.0153421
80	0.0153421
80	0
80	0.0153421
81.5	0.0153421
81.5	0.0132466
81	0.0132466
81	0
81	0.0132466
82	0.0132466
82	0
82	0.0132466
81.5	0.0132466
81.5	0.0153421
80.75	0.0153421
80.75	0.038428
83.5	0.038428
83.5	0.0255915
83	0.0255915
83	0
83	0.0255915
84	0.0255915
84	0
84	0.0255915
83.5	0.0255915
83.5	0.038428
82.125	0.038428
82.125	0.0516191
80.3125	0.0516191
80.3125	0.0753761
78.6562	0.0753761
78.6562	0.192024
76.7031	0.192024
76.7031	0.359251
85.9375	0.359251
85.9375	0.208483
85	0.208483
85	0
85	0.208483
86.875	0.208483
86.875	0.112069
86	0.112069
86	0
86	0.112069
87.75	0.112069
87.75	0.0648921
87	0.0648921
87	0
87	0.0648921
88.5	0.0648921
88.5	0.0188817
88	0.0188817
88	0
88	0.0188817
89	0.0188817
89	0
89	0.0188817
88.5	0.0188817
88.5	0.0648921
87.75	0.0648921
87.75	0.112069
86.875	0.112069
86.875	0.208483
85.9375	0.208483
85.9375	0.359251
81.3203	0.359251
81.3203	1.24691
74.8477	1.24691
74.8477	17.6116
108.17	17.6116
108.17	4.01915
95.0312	4.01915
95.0312	0.598534
91.5	0.598534
91.5	0.193157
90.5	0.193157
90.5	0.0258779
90	0.0258779
90	0
90	0.0258779
91	0.0258779
91	0
91	0.0258779
90.5	0.0258779
90.5	0.193157
92.5	0.193157
92.5	0.068071
92	0.068071
92	0
92	0.068071
93	0.068071
93	0
93	0.068071
92.5	0.068071
92.5	0.193157
91.5	0.193157
91.5	0.598534
98.5625	0.598534
98.5625	0.394108
95.625	0.394108
95.625	0.122722
94.5	0.122722
94.5	0.00848629
94	0.00848629
94	0
94	0.00848629
95	0.00848629
95	0
95	0.00848629
94.5	0.00848629
94.5	0.122722
96.75	0.122722
96.75	0.029787
96	0.029787
96	0
96	0.029787
97.5	0.029787
97.5	0.0193446
97	0.0193446
97	0
97	0.0193446
98	0.0193446
98	0
98	0.0193446
97.5	0.0193446
97.5	0.029787
96.75	0.029787
96.75	0.122722
95.625	0.122722
95.625	0.394108
101.5	0.394108
101.5	0.130455
99.75	0.130455
99.75	0.019438
99	0.019438
99	0
99	0.019438
100.5	0.019438
100.5	0.00455731
100	0.00455731
100	0
100	0.00455731
101	0.00455731
101	0
101	0.00455731
100.5	0.00455731
100.5	0.019438
99.75	0.019438
99.75	0.130455
103.25	0.130455
103.25	0.0421642
102	0.0421642
102	0
102	0.0421642
104.5	0.0421642
104.5	0.0226331
103.5	0.0226331
103.5	0.00884062
103	0.00884062
103	0
103	0.00884062
104	0.00884062
104	0
104	0.00884062
103.5	0.00884062
103.5	0.0226331
105.5	0.0226331
105.5	0.0142797
105	0.0142797
105	0
105	0.0142797
106	0.0142797
106	0
106	0.0142797
105.5	0.0142797
105.5	0.0226331
104.5	0.0226331
104.5	0.0421642
103.25	0.0421642
103.25	0.130455
101.5	0.130455
101.5	0.394108
98.5625	0.394108
98.5625	0.598534
95.0312	0.598534
95.0312	4.01915
121.309	4.01915
121.309	1.589
112.562	1.589
112.562	0.732075
108.875	0.732075
108.875	0.198063
107.5	0.198063
107.5	0.00986338
107	0.00986338
107	0
107	0.00986338
108	0.00986338
108	0
108	0.00986338
107.5	0.00986338
107.5	0.198063
110.25	0.198063
110.25	0.0585605
109	0.0585605
109	0
109	0.0585605
111.5	0.0585605
111.5	0.0444699
110.5	0.0444699
110.5	0.00536946
110	0.00536946
110	0
110	0.00536946
111	0.00536946
111	0
111	0.00536946
110.5	0.00536946
110.5	0.0444699
112.5	0.0444699
112.5	0.0131931
112	0.0131931
112	0
112	0.0131931
113	0.0131931
113	0
113	0.0131931
112.5	0.0131931
112.5	0.0444699
111.5	0.0444699
111.5	0.0585605
110.25	0.0585605
110.25	0.198063
108.875	0.198063
108.875	0.732075
116.25	0.732075
116.25	0.395309
114.5	0.395309
114.5	0.070557
114	0.070557
114	0
114	0.070557
115	0.070557
115	0
115	0.070557
114.5	0.070557
114.5	0.395309
118	0.395309
118	0.157779
116.5	0.157779
116.5	0.0116875
116	0.0116875
116	0
116	0.0116875
117	0.0116875
117	0
117	0.0116875
116.5	0.0116875
116.5	0.157779
119.5	0.157779
119.5	0.0596379
118.5	0.0596379
118.5	0.0235572
118	0.0235572
118	0
118	0.0235572
119	0.0235572
119	0
119	0.0235572
118.5	0.0235572
118.5	0.0596379
120.5	0.0596379
120.5	0.0484947
120	0.0484947
120	0
120	0.0484947
121	0.0484947
121	0
121	0.0484947
120.5	0.0484947
120.5	0.0596379
119.5	0.0596379
119.5	0.157779
118	0.157779
118	0.395309
116.25	0.395309
116.25	0.732075
112.562	0.732075
112.562	1.589
130.055	1.589
130.055	0.891841
124.812	0.891841
124.812	0.183301
122.875	0.183301
122.875	0.0786247
122	0.0786247
122	0
122	0.0786247
123.75	0.0786247
123.75	0.039413
123	0.039413
123	0
123	0.039413
124.5	0.039413
124.5	0.0150554
124	0.0150554
124	0
124	0.0150554
125	0.0150554
125	0
125	0.0150554
124.5	0.0150554
124.5	0.039413
123.75	0.039413
123.75	0.0786247
122.875	0.0786247
122.875	0.183301
126.75	0.183301
126.75	0.0820458
126	0.0820458
126	0
126	0.0820458
127.5	0.0820458
127.5	0.0264264
127	0.0264264
127	0
127	0.0264264
128	0.0264264
128	0
128	0.0264264
127.5	0.0264264
127.5	0.0820458
126.75	0.0820458
126.75	0.183301
124.812	0.183301
124.812	0.891841
135.297	0.891841
135.297	0.365795
131.062	0.365795
131.062	0.177788
129.5	0.177788
129.5	0.0309796
129	0.0309796
129	0
129	0.0309796
130	0.0309796
130	0
130	0.0309796
129.5	0.0309796
129.5	0.177788
132.625	0.177788
132.625	0.0646232
131.5	0.0646232
131.5	0.0207504
131	0.0207504
131	0
131	0.0207504
132	0.0207504
132	0
132	0.0207504
131.5	0.0207504
131.5	0.0646232
133.75	0.0646232
133.75	0.0228764
133	0.0228764
133	0
133	0.0228764
134.5	0.0228764
134.5	0.00894924
134	0.00894924
134	0
134	0.00894924
135	0.00894924
135	0
135	0.00894924
134.5	0.00894924
134.5	0.0228764
133.75	0.0228764
133.75	0.0646232
132.625	0.0646232
132.625	0.177788
131.062	0.177788
131.062	0.365795
139.531	0.365795
139.531	0.277958
136.938	0.277958
136.938	0.0567962
136	0.0567962
136	0
136	0.0567962
137.875	0.0567962
137.875	0.0415122
137	0.0415122
137	0
137	0.0415122
138.75	0.0415122
138.75	0.0179254
138	0.0179254
138	0
138	0.0179254
139.5	0.0179254
139.5	0.00442984
139	0.00442984
139	0
139	0.00442984
140	0.00442984
140	0
140	0.00442984
139.5	0.00442984
139.5	0.0179254
138.75	0.0179254
138.75	0.0415122
137.875	0.0415122
137.875	0.0567962
136.938	0.0567962
136.938	0.277958
142.125	0.277958
142.125	0.10523
141	0.10523
141	0
141	0.10523
143.25	0.10523
143.25	0.0714344
142	0.0714344
142	0
142	0.0714344
144.5	0.0714344
144.5	0.0260897
143.5	0.0260897
143.5	0.00540562
143	0.00540562
143	0
143	0.00540562
144	0.00540562
144	0
144	0.00540562
143.5	0.00540562
143.5	0.0260897
145.5	0.0260897
145.5	0.0145517
145	0.0145517
145	0
145	0.0145517
146	0.0145517
146	0
146	0.0145517
145.5	0.0145517
145.5	0.0260897
144.5	0.0260897
144.5	0.0714344
143.25	0.0714344
143.25	0.10523
142.125	0.10523
142.125	0.277958
139.531	0.277958
139.531	0.365795
135.297	0.365795
135.297	0.891841
130.055	0.891841
130.055	1.589
121.309	1.589
121.309	4.01915
108.17	4.01915
108.17	17.6116
91.5088	17.6116
91.5088	58.6997
161.24	58.6997
161.24	21.9481
150.812	21.9481
150.812	4.71296
148.5	4.71296
148.5	0.465957
147.5	0.465957
147.5	0.139927
147	0.139927
147	0
147	0.139927
148	0.139927
148	0
148	0.139927
147.5	0.139927
147.5	0.465957
149.5	0.465957
149.5	0.308405
149	0.308405
149	0
149	0.308405
150	0.308405
150	0
150	0.308405
149.5	0.308405
149.5	0.465957
148.5	0.465957
148.5	4.71296
153.125	4.71296
153.125	1.04894
151.75	1.04894
151.75	0.143599
151	0.143599
151	0
151	0.143599
152.5	0.143599
152.5	0.0132965
152	0.0132965
152	0
152	0.0132965
153	0.0132965
153	0
153	0.0132965
152.5	0.0132965
152.5	0.143599
151.75	0.143599
151.75	1.04894
154.5	1.04894
154.5	0.214547
154	0.214547
154	0
154	0.214547
155	0.214547
155	0
155	0.214547
154.5	0.214547
154.5	1.04894
153.125	1.04894
153.125	4.71296
150.812	4.71296
150.812	21.9481
171.668	21.9481
171.668	8.51326
161.727	8.51326
161.727	1.0631
157.688	1.0631
157.688	0.284515
156.5	0.284515
156.5	0.0485659
156	0.0485659
156	0
156	0.0485659
157	0.0485659
157	0
157	0.0485659
156.5	0.0485659
156.5	0.284515
158.875	0.284515
158.875	0.101178
158	0.101178
158	0
158	0.101178
159.75	0.101178
159.75	0.0721928
159	0.0721928
159	0
159	0.0721928
160.5	0.0721928
160.5	0.0236792
160	0.0236792
160	0
160	0.0236792
161	0.0236792
161	0
161	0.0236792
160.5	0.0236792
160.5	0.0721928
159.75	0.0721928
159.75	0.101178
158.875	0.101178
158.875	0.284515
157.688	0.284515
157.688	1.0631
165.766	1.0631
165.766	0.713226
162.5	0.713226
162.5	0.0893999
162	0.0893999
162	0
162	0.0893999
163	0.0893999
163	0
163	0.0893999
162.5	0.0893999
162.5	0.713226
169.031	0.713226
169.031	0.418369
166.312	0.418369
166.312	0.166293
164.75	0.166293
164.75	0.0551301
164	0.0551301
164	0
164	0.0551301
165.5	0.0551301
165.5	0.00572953
165	0.00572953
165	0
165	0.00572953
166	0.00572953
166	0
166	0.00572953
165.5	0.00572953
165.5	0.0551301
164.75	0.0551301
164.75	0.166293
167.875	0.166293
167.875	0.0693508
167	0.0693508
167	0
167	0.0693508
168.75	0.0693508
168.75	0.0422482
168	0.0422482
168	0
168	0.0422482
169.5	0.0422482
169.5	0.0204007
169	0.0204007
169	0
169	0.0204007
170	0.0204007
170	0
170	0.0204007
169.5	0.0204007
169.5	0.0422482
168.75	0.0422482
168.75	0.0693508
167.875	0.0693508
167.875	0.166293
166.312	0.166293
166.312	0.418369
171.75	0.418369
171.75	0.293425
171	0.293425
171	0
171	0.293425
172.5	0.293425
172.5	0.0488082
172	0.0488082
172	0
172	0.0488082
173	0.0488082
173	0
173	0.0488082
172.5	0.0488082
172.5	0.293425
171.75	0.293425
171.75	0.418369
169.031	0.418369
169.031	0.713226
165.766	0.713226
165.766	1.0631
161.727	1.0631
161.727	8.51326
181.609	8.51326
181.609	4.36214
176.594	4.36214
176.594	0.411258
174.5	0.411258
174.5	0.0640927
174	0.0640927
174	0
174	0.0640927
175	0.0640927
175	0
175	0.0640927
174.5	0.0640927
174.5	0.411258
178.688	0.411258
178.688	0.322653
176.875	0.322653
176.875	0.0698948
176	0.0698948
176	0
176	0.0698948
177.75	0.0698948
177.75	0.0140551
177	0.0140551
177	0
177	0.0140551
178.5	0.0140551
178.5	0.0102145
178	0.0102145
178	0
178	0.0102145
179	0.0102145
179	0
179	0.0102145
178.5	0.0102145
178.5	0.0140551
177.75	0.0140551
177.75	0.0698948
176.875	0.0698948
176.875	0.322653
180.5	0.322653
180.5	0.081722
180	0.081722
180	0
180	0.081722
181	0.081722
181	0
181	0.081722
180.5	0.081722
180.5	0.322653
178.688	0.322653
178.688	0.411258
176.594	0.411258
176.594	4.36214
186.625	4.36214
186.625	1.97006
183.625	1.97006
183.625	0.407123
182.5	0.407123
182.5	0.0828228
182	0.0828228
182	0
182	0.0828228
183	0.0828228
183	0
183	0.0828228
182.5	0.0828228
182.5	0.407123
184.75	0.407123
184.75	0.183343
184	0.183343
184	0
184	0.183343
185.5	0.183343
185.5	0.0803135
185	0.0803135
185	0
185	0.0803135
186	0.0803135
186	0
186	0.0803135
185.5	0.0803135
185.5	0.183343
184.75	0.183343
184.75	0.407123
183.625	0.407123
183.625	1.97006
189.625	1.97006
189.625	0.447862
187.75	0.447862
187.75	0.123509
187	0.123509
187	0
187	0.123509
188.5	0.123509
188.5	0.025807
188	0.025807
188	0
188	0.025807
189	0.025807
189	0
189	0.025807
188.5	0.025807
188.5	0.123509
187.75	0.123509
187.75	0.447862
191.5	0.447862
191.5	0.329047
190.5	0.329047
190.5	0.0322646
190	0.0322646
190	0
190	0.0322646
191	0.0322646
191	0
191	0.0322646
190.5	0.0322646
190.5	0.329047
192.5	0.329047
192.5	0.0785337
192	0.0785337
192	0
192	0.0785337
193	0.0785337
193	0
193	0.0785337
192.5	0.0785337
192.5	0.329047
191.5	0.329047
191.5	0.447862
189.625	0.447862
189.625	1.97006
186.625	1.97006
186.625	4.36214
181.609	4.36214
181.609	8.51326
171.668	8.51326
171.668	21.9481
161.24	21.9481
161.24	58.6997
126.375	58.6997
126.375	64.1592
85.6013	64.1592
85.6013	93.1154
51.1835	93.1154
51.1835	166.22
304.82	166.22
304.82	141.909
249.775	141.909
249.775	26.5408
225.234	26.5408
225.234	5.80704
209.758	5.80704
209.758	1.52637
203.75	1.52637
203.75	0.401671
199	0.401671
199	0.197716
195.688	0.197716
195.688	0.0567178
194.5	0.0567178
194.5	0.00494441
194	0.00494441
194	0
194	0.00494441
195	0.00494441
195	0
195	0.00494441
194.5	0.00494441
194.5	0.0567178
196.875	0.0567178
196.875	0.0330825
196	0.0330825
196	0
196	0.0330825
197.75	0.0330825
197.75	0.0157986
197	0.0157986
197	0
197	0.0157986
198.5	0.0157986
198.5	0.00477285
198	0.00477285
198	0
198	0.00477285
199	0.00477285
199	0
199	0.00477285
198.5	0.00477285
198.5	0.0157986
197.75	0.0157986
197.75	0.0330825
196.875	0.0330825
196.875	0.0567178
195.688	0.0567178
195.688	0.197716
202.312	0.197716
202.312	0.0892071
200.75	0.0892071
200.75	0.0214798
200	0.0214798
200	0
200	0.0214798
201.5	0.0214798
201.5	0.0103723
201	0.0103723
201	0
201	0.0103723
202	0.0103723
202	0
202	0.0103723
201.5	0.0103723
201.5	0.0214798
200.75	0.0214798
200.75	0.0892071
203.875	0.0892071
203.875	0.0518731
203	0.0518731
203	0
203	0.0518731
204.75	0.0518731
204.75	0.0128721
204	0.0128721
204	0
204	0.0128721
205.5	0.0128721
205.5	0.0108027
205	0.0108027
205	0
205	0.0108027
206	0.0108027
206	0
206	0.0108027
205.5	0.0108027
205.5	0.0128721
204.75	0.0128721
204.75	0.0518731
203.875	0.0518731
203.875	0.0892071
202.312	0.0892071
202.312	0.197716
199	0.197716
199	0.401671
208.5	0.401671
208.5	0.235666
207.5	0.235666
207.5	0.016115
207	0.016115
207	0
207	0.016115
208	0.016115
208	0
208	0.016115
207.5	0.016115
207.5	0.235666
209.5	0.235666
209.5	0.0436457
209	0.0436457
209	0
209	0.0436457
210	0.0436457
210	0
210	0.0436457
209.5	0.0436457
209.5	0.235666
208.5	0.235666
208.5	0.401671
203.75	0.401671
203.75	1.52637
215.766	1.52637
215.766	0.442961
211.875	0.442961
211.875	0.0800573
211	0.0800573
211	0
211	0.0800573
212.75	0.0800573
212.75	0.0370799
212	0.0370799
212	0
212	0.0370799
213.5	0.0370799
213.5	0.0136603
213	0.0136603
213	0
213	0.0136603
214	0.0136603
214	0
214	0.0136603
213.5	0.0136603
213.5	0.0370799
212.75	0.0370799
212.75	0.0800573
211.875	0.0800573
211.875	0.442961
219.656	0.442961
219.656	0.32429
216.625	0.32429
216.625	0.126612
215.5	0.126612
215.5	0.0185989
215	0.0185989
215	0
215	0.0185989
216	0.0185989
216	0
216	0.0185989
215.5	0.0185989
215.5	0.126612
217.75	0.126612
217.75	0.0448358
217	0.0448358
217	0
217	0.0448358
218.5	0.0448358
218.5	0.00577085
218	0.00577085
218	0
218	0.00577085
219	0.00577085
219	0
219	0.00577085
218.5	0.00577085
218.5	0.0448358
217.75	0.0448358
217.75	0.126612
216.625	0.126612
216.625	0.32429
222.688	0.32429
222.688	0.188005
220.75	0.188005
220.75	0.0215942
220	0.0215942
220	0
220	0.0215942
221.5	0.0215942
221.5	0.00892528
221	0.00892528
221	0
221	0.00892528
222	0.00892528
222	0
222	0.00892528
221.5	0.00892528
221.5	0.0215942
220.75	0.0215942
220.75	0.188005
224.625	0.188005
224.625	0.0876102
223.5	0.0876102
223.5	0.0287709
223	0.0287709
223	0
223	0.0287709
224	0.0287709
224	0
224	0.0287709
223.5	0.0287709
223.5	0.0876102
225.75	0.0876102
225.75	0.0600096
225	0.0600096
225	0
225	0.0600096
226.5	0.0600096
226.5	0.0173567
226	0.0173567
226	0
226	0.0173567
227	0.0173567
227	0
227	0.0173567
226.5	0.0173567
226.5	0.0600096
225.75	0.0600096
225.75	0.0876102
224.625	0.0876102
224.625	0.188005
222.688	0.188005
222.688	0.32429
219.656	0.32429
219.656	0.442961
215.766	0.442961
215.766	1.52637
209.758	1.52637
209.758	5.80704
240.711	5.80704
240.711	4.24614
232.484	4.24614
232.484	0.908284
228.875	0.908284
228.875	0.0374613
228	0.0374613
228	0
228	0.0374613
229.75	0.0374613
229.75	0.0205908
229	0.0205908
229	0
229	0.0205908
230.5	0.0205908
230.5	0.0110533
230	0.0110533
230	0
230	0.0110533
231	0.0110533
231	0
231	0.0110533
230.5	0.0110533
230.5	0.0205908
229.75	0.0205908
229.75	0.0374613
228.875	0.0374613
228.875	0.908284
236.094	0.908284
236.094	0.35444
232.938	0.35444
232.938	0.0583767
232	0.0583767
232	0
232	0.0583767
233.875	0.0583767
233.875	0.0367878
233	0.0367878
233	0
233	0.0367878
234.75	0.0367878
234.75	0.0230241
234	0.0230241
234	0
234	0.0230241
235.5	0.0230241
235.5	0.0124717
235	0.0124717
235	0
235	0.0124717
236	0.0124717
236	0
236	0.0124717
235.5	0.0124717
235.5	0.0230241
234.75	0.0230241
234.75	0.0367878
233.875	0.0367878
233.875	0.0583767
232.938	0.0583767
232.938	0.35444
239.25	0.35444
239.25	0.172167
237.75	0.172167
237.75	0.0187765
237	0.0187765
237	0
237	0.0187765
238.5	0.0187765
238.5	0.0137403
238	0.0137403
238	0
238	0.0137403
239	0.0137403
239	0
239	0.0137403
238.5	0.0137403
238.5	0.0187765
237.75	0.0187765
237.75	0.172167
240.75	0.172167
240.75	0.0776562
240	0.0776562
240	0
240	0.0776562
241.5	0.0776562
241.5	0.0291815
241	0.0291815
241	0
241	0.0291815
242	0.0291815
242	0
242	0.0291815
241.5	0.0291815
241.5	0.0776562
240.75	0.0776562
240.75	0.172167
239.25	0.172167
239.25	0.35444
236.094	0.35444
236.094	0.908284
232.484	0.908284
232.484	4.24614
248.938	4.24614
248.938	3.04779
244.312	3.04779
244.312	0.217111
243	0.217111
243	0
243	0.217111
245.625	0.217111
245.625	0.154157
244.5	0.154157
244.5	0.00878081
244	0.00878081
244	0
244	0.00878081
245	0.00878081
245	0
245	0.00878081
244.5	0.00878081
244.5	0.154157
246.75	0.154157
246.75	0.0869649
246	0.0869649
246	0
246	0.0869649
247.5	0.0869649
247.5	0.0366374
247	0.0366374
247	0
247	0.0366374
248	0.0366374
248	0
248	0.0366374
247.5	0.0366374
247.5	0.0869649
246.75	0.0869649
246.75	0.154157
245.625	0.154157
245.625	0.217111
244.312	0.217111
244.312	3.04779
253.562	3.04779
253.562	1.03098
249.875	1.03098
249.875	0.0748616
249	0.0748616
249	0
249	0.0748616
250.75	0.0748616
250.75	0.0442692
250	0.0442692
250	0
250	0.0442692
251.5	0.0442692
251.5	0.00660679
251	0.00660679
251	0
251	0.00660679
252	0.00660679
252	0
252	0.00660679
251.5	0.00660679
251.5	0.0442692
250.75	0.0442692
250.75	0.0748616
249.875	0.0748616
249.875	1.03098
257.25	1.03098
257.25	0.318327
254.25	0.318327
254.25	0.0258675
253	0.0258675
253	0
253	0.0258675
255.5	0.0258675
255.5	0.0160143
254.5	0.0160143
254.5	0.000572879
254	0.000572879
254	0
254	0.000572879
255	0.000572879
255	0
255	0.000572879
254.5	0.000572879
254.5	0.0160143
256.5	0.0160143
256.5	0.00547663
256	0.00547663
256	0
256	0.00547663
257	0.00547663
257	0
257	0.00547663
256.5	0.00547663
256.5	0.0160143
255.5	0.0160143
255.5	0.0258675
254.25	0.0258675
254.25	0.318327
260.25	0.318327
260.25	0.166397
258	0.166397
258	0
258	0.166397
262.5	0.166397
262.5	0.131925
260.5	0.131925
260.5	0.0307807
259.5	0.0307807
259.5	0.0096842
259	0.0096842
259	0
259	0.0096842
260	0.0096842
260	0
260	0.0096842
259.5	0.0096842
259.5	0.0307807
261.5	0.0307807
261.5	0.0132143
261	0.0132143
261	0
261	0.0132143
262	0.0132143
262	0
262	0.0132143
261.5	0.0132143
261.5	0.0307807
260.5	0.0307807
260.5	0.131925
264.5	0.131925
264.5	0.0507132
263.5	0.0507132
263.5	0.0159475
263	0.0159475
263	0
263	0.0159475
264	0.0159475
264	0
264	0.0159475
263.5	0.0159475
263.5	0.0507132
265.5	0.0507132
265.5	0.0270931
265	0.0270931
265	0
265	0.0270931
266	0.0270931
266	0
266	0.0270931
265.5	0.0270931
265.5	0.0507132
264.5	0.0507132
264.5	0.131925
262.5	0.131925
262.5	0.166397
260.25	0.166397
260.25	0.318327
257.25	0.318327
257.25	1.03098
253.562	1.03098
253.562	3.04779
248.938	3.04779
248.938	4.24614
240.711	4.24614
240.711	5.80704
225.234	5.80704
225.234	26.5408
274.315	26.5408
274.315	15.9594
267.75	15.9594
267.75	0.668809
267	0.668809
267	0
267	0.668809
268.5	0.668809
268.5	0.0520899
268	0.0520899
268	0
268	0.0520899
269	0.0520899
269	0
269	0.0520899
268.5	0.0520899
268.5	0.668809
267.75	0.668809
267.75	15.9594
280.881	15.9594
280.881	4.58366
273.688	4.58366
273.688	0.354317
271.625	0.354317
271.625	0.107289
270.5	0.107289
270.5	0.0278956
270	0.0278956
270	0
270	0.0278956
271	0.0278956
271	0
271	0.0278956
270.5	0.0278956
270.5	0.107289
272.75	0.107289
272.75	0.0378702
272	0.0378702
272	0
272	0.0378702
273.5	0.0378702
273.5	0.0315764
273	0.0315764
273	0
273	0.0315764
274	0.0315764
274	0
274	0.0315764
273.5	0.0315764
273.5	0.0378702
272.75	0.0378702
272.75	0.107289
271.625	0.107289
271.625	0.354317
275.75	0.354317
275.75	0.185176
275	0.185176
275	0
275	0.185176
276.5	0.185176
276.5	0.019171
276	0.019171
276	0
276	0.019171
277	0.019171
277	0
277	0.019171
276.5	0.019171
276.5	0.185176
275.75	0.185176
275.75	0.354317
273.688	0.354317
273.688	4.58366
288.074	4.58366
288.074	2.71562
280.625	2.71562
280.625	0.342741
278.75	0.342741
278.75	0.0237432
278	0.0237432
278	0
278	0.0237432
279.5	0.0237432
279.5	0.0194893
279	0.0194893
279	0
279	0.0194893
280	0.0194893
280	0
280	0.0194893
279.5	0.0194893
279.5	0.0237432
278.75	0.0237432
278.75	0.342741
282.5	0.342741
282.5	0.0900921
281.5	0.0900921
281.5	0.0139696
281	0.0139696
281	0
281	0.0139696
282	0.0139696
282	0
282	0.0139696
281.5	0.0139696
281.5	0.0900921
283.5	0.0900921
283.5	0.0510254
283	0.0510254
283	0
283	0.0510254
284	0.0510254
284	0
284	0.0510254
283.5	0.0510254
283.5	0.0900921
282.5	0.0900921
282.5	0.342741
280.625	0.342741
280.625	2.71562
295.523	2.71562
295.523	1.6973
288.719	1.6973
288.719	0.531044
285.75	0.531044
285.75	0.0498277
285	0.0498277
285	0
285	0.0498277
286.5	0.0498277
286.5	0.0433341
286	0.0433341
286	0
286	0.0433341
287	0.0433341
287	0
287	0.0433341
286.5	0.0433341
286.5	0.0498277
[truncated: 1,655 more rows]

## Sheet: AHC_HID2
276.748	899.29					1.75	899.29	1	201
129.1	899.29					1	899.29	2	201
129.1	179.068					1	0	3	201
72.2612	179.068					1	899.29
72.2612	32.435					2.5	899.29
37.9727	32.435					2.5	223.323
37.9727	4.75897					2	223.323
13.5469	4.75897					2	0
13.5469	0.829386					2	223.323
7.1875	0.829386					3	223.323
7.1875	0.144504					3	0
4.125	0.144504					3	223.323
4.125	0.0584299					2.5	223.323
2.5	0.0584299					2.5	899.29
2.5	0.00965902					1.75	899.29
1.5	0.00965902
1.5	0.000717637
1	0.000717637
1	0
1	0.000717637
2	0.000717637
2	0
2	0.000717637
1.5	0.000717637
1.5	0.00965902
3.5	0.00965902
3.5	0.00284658
3	0.00284658
3	0
3	0.00284658
4	0.00284658
4	0
4	0.00284658
3.5	0.00284658
3.5	0.00965902
2.5	0.00965902
2.5	0.0584299
5.75	0.0584299
5.75	0.033212
5	0.033212
5	0
5	0.033212
6.5	0.033212
6.5	0.00316699
6	0.00316699
6	0
6	0.00316699
7	0.00316699
7	0
7	0.00316699
6.5	0.00316699
6.5	0.033212
5.75	0.033212
5.75	0.0584299
4.125	0.0584299
4.125	0.144504
10.25	0.144504
10.25	0.07213
8.75	0.07213
8.75	0.00639265
8	0.00639265
8	0
8	0.00639265
9.5	0.00639265
9.5	0.00334805
9	0.00334805
9	0
9	0.00334805
10	0.00334805
10	0
10	0.00334805
9.5	0.00334805
9.5	0.00639265
8.75	0.00639265
8.75	0.07213
11.75	0.07213
11.75	0.0202506
11	0.0202506
11	0
11	0.0202506
12.5	0.0202506
12.5	0.00418361
12	0.00418361
12	0
12	0.00418361
13	0.00418361
13	0
13	0.00418361
12.5	0.00418361
12.5	0.0202506
11.75	0.0202506
11.75	0.07213
10.25	0.07213
10.25	0.144504
7.1875	0.144504
7.1875	0.829386
19.9062	0.829386
19.9062	0.31758
15.5	0.31758
15.5	0.0433837
14.5	0.0433837
14.5	0.0093458
14	0.0093458
14	0
14	0.0093458
15	0.0093458
15	0
15	0.0093458
14.5	0.0093458
14.5	0.0433837
16.5	0.0433837
16.5	0.0161222
16	0.0161222
16	0
16	0.0161222
17	0.0161222
17	0
17	0.0161222
16.5	0.0161222
16.5	0.0433837
15.5	0.0433837
15.5	0.31758
24.3125	0.31758
24.3125	0.178498
19.625	0.178498
19.625	0.0545603
18.5	0.0545603
18.5	0.00627233
18	0.00627233
18	0
18	0.00627233
19	0.00627233
19	0
19	0.00627233
18.5	0.00627233
18.5	0.0545603
20.75	0.0545603
20.75	0.0154886
20	0.0154886
20	0
20	0.0154886
21.5	0.0154886
21.5	0.006684
21	0.006684
21	0
21	0.006684
22	0.006684
22	0
22	0.006684
21.5	0.006684
21.5	0.0154886
20.75	0.0154886
20.75	0.0545603
19.625	0.0545603
19.625	0.178498
29	0.178498
29	0.0824157
25.3125	0.0824157
25.3125	0.0163865
23.75	0.0163865
23.75	0.00521573
23	0.00521573
23	0
23	0.00521573
24.5	0.00521573
24.5	0.00214872
24	0.00214872
24	0
24	0.00214872
25	0.00214872
25	0
25	0.00214872
24.5	0.00214872
24.5	0.00521573
23.75	0.00521573
23.75	0.0163865
26.875	0.0163865
26.875	0.00844265
26	0.00844265
26	0
26	0.00844265
27.75	0.00844265
27.75	0.00193962
27	0.00193962
27	0
27	0.00193962
28.5	0.00193962
28.5	0.00187038
28	0.00187038
28	0
28	0.00187038
29	0.00187038
29	0
29	0.00187038
28.5	0.00187038
28.5	0.00193962
27.75	0.00193962
27.75	0.00844265
26.875	0.00844265
26.875	0.0163865
25.3125	0.0163865
25.3125	0.0824157
32.6875	0.0824157
32.6875	0.0433396
30.75	0.0433396
30.75	0.0061712
30	0.0061712
30	0
30	0.0061712
31.5	0.0061712
31.5	0.000739532
31	0.000739532
31	0
31	0.000739532
32	0.000739532
32	0
32	0.000739532
31.5	0.000739532
31.5	0.0061712
30.75	0.0061712
30.75	0.0433396
34.625	0.0433396
34.625	0.00757486
33.5	0.00757486
33.5	0.00108163
33	0.00108163
33	0
33	0.00108163
34	0.00108163
34	0
34	0.00108163
33.5	0.00108163
33.5	0.00757486
35.75	0.00757486
35.75	0.00407417
35	0.00407417
35	0
35	0.00407417
36.5	0.00407417
36.5	0.00146623
36	0.00146623
36	0
36	0.00146623
37	0.00146623
37	0
37	0.00146623
36.5	0.00146623
36.5	0.00407417
35.75	0.00407417
35.75	0.00757486
34.625	0.00757486
34.625	0.0433396
32.6875	0.0433396
32.6875	0.0824157
29	0.0824157
29	0.178498
24.3125	0.178498
24.3125	0.31758
19.9062	0.31758
19.9062	0.829386
13.5469	0.829386
13.5469	4.75897
62.3984	4.75897
62.3984	2.94469
50.6484	2.94469
50.6484	0.584359
43.1562	0.584359
43.1562	0.131491
40.125	0.131491
40.125	0.0272931
38.75	0.0272931
38.75	0.00539624
38	0.00539624
38	0
38	0.00539624
39.5	0.00539624
39.5	0.00105541
39	0.00105541
39	0
39	0.00105541
40	0.00105541
40	0
40	0.00105541
39.5	0.00105541
39.5	0.00539624
38.75	0.00539624
38.75	0.0272931
41.5	0.0272931
41.5	0.00941359
41	0.00941359
41	0
41	0.00941359
42	0.00941359
42	0
42	0.00941359
41.5	0.00941359
41.5	0.0272931
40.125	0.0272931
40.125	0.131491
46.1875	0.131491
46.1875	0.102224
43.875	0.102224
43.875	0.0207081
43	0.0207081
43	0
43	0.0207081
44.75	0.0207081
44.75	0.013739
44	0.013739
44	0
44	0.013739
45.5	0.013739
45.5	0.00613063
45	0.00613063
45	0
45	0.00613063
46	0.00613063
46	0
46	0.00613063
45.5	0.00613063
45.5	0.013739
44.75	0.013739
44.75	0.0207081
43.875	0.0207081
43.875	0.102224
48.5	0.102224
48.5	0.0207156
47.5	0.0207156
47.5	0.00167443
47	0.00167443
47	0
47	0.00167443
48	0.00167443
48	0
48	0.00167443
47.5	0.00167443
47.5	0.0207156
49.5	0.0207156
49.5	0.00517999
49	0.00517999
49	0
49	0.00517999
50	0.00517999
50	0
50	0.00517999
49.5	0.00517999
49.5	0.0207156
48.5	0.0207156
48.5	0.102224
46.1875	0.102224
46.1875	0.131491
43.1562	0.131491
43.1562	0.584359
58.1406	0.584359
58.1406	0.330837
53.4062	0.330837
53.4062	0.0315238
51.5	0.0315238
51.5	0.00443344
51	0.00443344
51	0
51	0.00443344
52	0.00443344
52	0
52	0.00443344
51.5	0.00443344
51.5	0.0315238
55.3125	0.0315238
55.3125	0.0256259
53.75	0.0256259
53.75	0.00410906
53	0.00410906
53	0
53	0.00410906
54.5	0.00410906
54.5	0.00125315
54	0.00125315
54	0
54	0.00125315
55	0.00125315
55	0
55	0.00125315
54.5	0.00125315
54.5	0.00410906
53.75	0.00410906
53.75	0.0256259
56.875	0.0256259
56.875	0.0106272
56	0.0106272
56	0
56	0.0106272
57.75	0.0106272
57.75	0.00598217
57	0.00598217
57	0
57	0.00598217
58.5	0.00598217
58.5	0.000566162
58	0.000566162
58	0
58	0.000566162
59	0.000566162
59	0
59	0.000566162
58.5	0.000566162
58.5	0.00598217
57.75	0.00598217
57.75	0.0106272
56.875	0.0106272
56.875	0.0256259
55.3125	0.0256259
55.3125	0.0315238
53.4062	0.0315238
53.4062	0.330837
62.875	0.330837
62.875	0.0718184
60.875	0.0718184
60.875	0.0133092
60	0.0133092
60	0
60	0.0133092
61.75	0.0133092
61.75	0.00194748
61	0.00194748
61	0
61	0.00194748
62.5	0.00194748
62.5	0.000371517
62	0.000371517
62	0
62	0.000371517
63	0.000371517
63	0
63	0.000371517
62.5	0.000371517
62.5	0.00194748
61.75	0.00194748
61.75	0.0133092
60.875	0.0133092
60.875	0.0718184
64.875	0.0718184
64.875	0.0426096
64	0.0426096
64	0
64	0.0426096
65.75	0.0426096
65.75	0.00878048
65	0.00878048
65	0
65	0.00878048
66.5	0.00878048
66.5	0.00433577
66	0.00433577
66	0
66	0.00433577
67	0.00433577
67	0
67	0.00433577
66.5	0.00433577
66.5	0.00878048
65.75	0.00878048
65.75	0.0426096
64.875	0.0426096
64.875	0.0718184
62.875	0.0718184
62.875	0.330837
58.1406	0.330837
58.1406	0.584359
50.6484	0.584359
50.6484	2.94469
74.1484	2.94469
74.1484	1.10321
69.6875	1.10321
69.6875	0.096255
68.5	0.096255
68.5	0.0078669
68	0.0078669
68	0
68	0.0078669
69	0.0078669
69	0
69	0.0078669
68.5	0.0078669
68.5	0.096255
70.875	0.096255
70.875	0.0376087
70	0.0376087
70	0
70	0.0376087
71.75	0.0376087
71.75	0.0144894
71	0.0144894
71	0
71	0.0144894
72.5	0.0144894
72.5	0.00663408
72	0.00663408
72	0
72	0.00663408
73	0.00663408
73	0
73	0.00663408
72.5	0.00663408
72.5	0.0144894
71.75	0.0144894
71.75	0.0376087
70.875	0.0376087
70.875	0.096255
69.6875	0.096255
69.6875	1.10321
78.6094	1.10321
78.6094	0.235522
76.125	0.235522
76.125	0.0920435
74.75	0.0920435
74.75	0.0311312
74	0.0311312
74	0
74	0.0311312
75.5	0.0311312
75.5	0.00852872
75	0.00852872
75	0
75	0.00852872
76	0.00852872
76	0
76	0.00852872
75.5	0.00852872
75.5	0.0311312
74.75	0.0311312
74.75	0.0920435
77.5	0.0920435
77.5	0.0379725
77	0.0379725
77	0
77	0.0379725
78	0.0379725
78	0
78	0.0379725
77.5	0.0379725
77.5	0.0920435
76.125	0.0920435
76.125	0.235522
81.0938	0.235522
81.0938	0.114401
79.5	0.114401
79.5	0.0190615
79	0.0190615
79	0
79	0.0190615
80	0.0190615
80	0
80	0.0190615
79.5	0.0190615
79.5	0.114401
82.6875	0.114401
82.6875	0.0191834
81.5	0.0191834
81.5	0.000187263
81	0.000187263
81	0
81	0.000187263
82	0.000187263
82	0
82	0.000187263
81.5	0.000187263
81.5	0.0191834
83.875	0.0191834
83.875	0.0094074
83	0.0094074
83	0
83	0.0094074
84.75	0.0094074
84.75	0.00411433
84	0.00411433
84	0
84	0.00411433
85.5	0.00411433
85.5	0.000781683
85	0.000781683
85	0
85	0.000781683
86	0.000781683
86	0
86	0.000781683
85.5	0.000781683
85.5	0.00411433
84.75	0.00411433
84.75	0.0094074
83.875	0.0094074
83.875	0.0191834
82.6875	0.0191834
82.6875	0.114401
81.0938	0.114401
81.0938	0.235522
78.6094	0.235522
78.6094	1.10321
74.1484	1.10321
74.1484	2.94469
62.3984	2.94469
62.3984	4.75897
37.9727	4.75897
37.9727	32.435
106.55	32.435
106.55	13.544
87.75	13.544
87.75	0.644334
87	0.644334
87	0
87	0.644334
88.5	0.644334
88.5	0.0427449
88	0.0427449
88	0
88	0.0427449
89	0.0427449
89	0
89	0.0427449
88.5	0.0427449
88.5	0.644334
87.75	0.644334
87.75	13.544
125.35	13.544
125.35	6.71565
112.84	6.71565
112.84	2.45016
102.336	2.45016
102.336	0.595354
95.8125	0.595354
95.8125	0.259978
92.125	0.259978
92.125	0.0580652
90.75	0.0580652
90.75	0.010399
90	0.010399
90	0
90	0.010399
91.5	0.010399
91.5	0.00278009
91	0.00278009
91	0
91	0.00278009
92	0.00278009
92	0
92	0.00278009
91.5	0.00278009
91.5	0.010399
90.75	0.010399
90.75	0.0580652
93.5	0.0580652
93.5	0.0104907
93	0.0104907
93	0
93	0.0104907
94	0.0104907
94	0
94	0.0104907
93.5	0.0104907
93.5	0.0580652
92.125	0.0580652
92.125	0.259978
99.5	0.259978
99.5	0.199996
96.5	0.199996
96.5	0.0492502
95.5	0.0492502
95.5	0.00577985
95	0.00577985
95	0
95	0.00577985
96	0.00577985
96	0
96	0.00577985
95.5	0.00577985
95.5	0.0492502
97.5	0.0492502
97.5	0.0283557
97	0.0283557
97	0
97	0.0283557
98	0.0283557
98	0
98	0.0283557
97.5	0.0283557
97.5	0.0492502
96.5	0.0492502
96.5	0.199996
102.5	0.199996
102.5	0.0676259
100.5	0.0676259
100.5	0.011083
99.5	0.011083
99.5	0.00117211
99	0.00117211
99	0
99	0.00117211
100	0.00117211
100	0
100	0.00117211
99.5	0.00117211
99.5	0.011083
101.5	0.011083
101.5	0.00688007
101	0.00688007
101	0
101	0.00688007
102	0.00688007
102	0
102	0.00688007
101.5	0.00688007
101.5	0.011083
100.5	0.011083
100.5	0.0676259
104.5	0.0676259
104.5	0.0170551
103.5	0.0170551
103.5	0.00203646
103	0.00203646
103	0
103	0.00203646
104	0.00203646
104	0
104	0.00203646
103.5	0.00203646
103.5	0.0170551
105.5	0.0170551
105.5	0.00495681
105	0.00495681
105	0
105	0.00495681
106	0.00495681
106	0
106	0.00495681
105.5	0.00495681
105.5	0.0170551
104.5	0.0170551
104.5	0.0676259
102.5	0.0676259
102.5	0.199996
99.5	0.199996
99.5	0.259978
95.8125	0.259978
95.8125	0.595354
108.859	0.595354
108.859	0.315679
107	0.315679
107	0
107	0.315679
110.719	0.315679
110.719	0.128506
108.75	0.128506
108.75	0.0195471
108	0.0195471
108	0
108	0.0195471
109.5	0.0195471
109.5	0.00923166
109	0.00923166
109	0
109	0.00923166
110	0.00923166
110	0
110	0.00923166
109.5	0.00923166
109.5	0.0195471
108.75	0.0195471
108.75	0.128506
112.688	0.128506
112.688	0.0311557
111.5	0.0311557
111.5	0.00740572
111	0.00740572
111	0
111	0.00740572
112	0.00740572
112	0
112	0.00740572
111.5	0.00740572
111.5	0.0311557
113.875	0.0311557
113.875	0.0174877
113	0.0174877
113	0
113	0.0174877
114.75	0.0174877
114.75	0.00462038
114	0.00462038
114	0
114	0.00462038
115.5	0.00462038
115.5	0.000488743
115	0.000488743
115	0
115	0.000488743
116	0.000488743
116	0
116	0.000488743
115.5	0.000488743
115.5	0.00462038
114.75	0.00462038
114.75	0.0174877
113.875	0.0174877
113.875	0.0311557
112.688	0.0311557
112.688	0.128506
110.719	0.128506
110.719	0.315679
108.859	0.315679
108.859	0.595354
102.336	0.595354
102.336	2.45016
123.344	2.45016
123.344	0.683394
120	0.683394
120	0.156788
118.5	0.156788
118.5	0.0598874
117.5	0.0598874
117.5	0.0134989
117	0.0134989
117	0
117	0.0134989
118	0.0134989
118	0
118	0.0134989
117.5	0.0134989
117.5	0.0598874
119.5	0.0598874
119.5	0.0355658
119	0.0355658
119	0
119	0.0355658
120	0.0355658
120	0
120	0.0355658
119.5	0.0355658
119.5	0.0598874
118.5	0.0598874
118.5	0.156788
121.5	0.156788
121.5	0.0612402
121	0.0612402
121	0
121	0.0612402
122	0.0612402
122	0
122	0.0612402
121.5	0.0612402
121.5	0.156788
120	0.156788
120	0.683394
126.688	0.683394
126.688	0.445277
124.625	0.445277
124.625	0.0871137
123.5	0.0871137
123.5	0.00368199
123	0.00368199
123	0
123	0.00368199
124	0.00368199
124	0
124	0.00368199
123.5	0.00368199
123.5	0.0871137
125.75	0.0871137
125.75	0.0321662
125	0.0321662
125	0
125	0.0321662
126.5	0.0321662
126.5	0.00487239
126	0.00487239
126	0
126	0.00487239
127	0.00487239
127	0
127	0.00487239
126.5	0.00487239
126.5	0.0321662
125.75	0.0321662
125.75	0.0871137
124.625	0.0871137
124.625	0.445277
128.75	0.445277
128.75	0.120847
128	0.120847
128	0
128	0.120847
129.5	0.120847
129.5	0.058167
129	0.058167
129	0
129	0.058167
130	0.058167
130	0
130	0.058167
129.5	0.058167
129.5	0.120847
128.75	0.120847
128.75	0.445277
126.688	0.445277
126.688	0.683394
123.344	0.683394
123.344	2.45016
112.84	2.45016
112.84	6.71565
137.859	6.71565
137.859	2.91342
134.75	2.91342
134.75	0.304632
132.625	0.304632
132.625	0.0922326
131.5	0.0922326
131.5	0.0216314
131	0.0216314
131	0
131	0.0216314
132	0.0216314
132	0
132	0.0216314
131.5	0.0216314
131.5	0.0922326
133.75	0.0922326
133.75	0.035258
133	0.035258
133	0
133	0.035258
134.5	0.035258
134.5	0.00523887
134	0.00523887
134	0
134	0.00523887
135	0.00523887
135	0
135	0.00523887
134.5	0.00523887
134.5	0.035258
133.75	0.035258
133.75	0.0922326
132.625	0.0922326
132.625	0.304632
136.875	0.304632
136.875	0.208957
136	0.208957
136	0
136	0.208957
137.75	0.208957
137.75	0.0981241
137	0.0981241
137	0
137	0.0981241
138.5	0.0981241
138.5	0.0143459
138	0.0143459
138	0
138	0.0143459
139	0.0143459
139	0
139	0.0143459
138.5	0.0143459
138.5	0.0981241
137.75	0.0981241
137.75	0.208957
136.875	0.208957
136.875	0.304632
134.75	0.304632
134.75	2.91342
140.969	2.91342
140.969	0.452614
140	0.452614
140	0
140	0.452614
141.938	0.452614
141.938	0.186216
141	0.186216
141	0
141	0.186216
142.875	0.186216
142.875	0.107743
142	0.107743
142	0
142	0.107743
143.75	0.107743
143.75	0.0358764
143	0.0358764
143	0
143	0.0358764
144.5	0.0358764
144.5	0.0106389
144	0.0106389
144	0
144	0.0106389
145	0.0106389
145	0
145	0.0106389
144.5	0.0106389
144.5	0.0358764
143.75	0.0358764
143.75	0.107743
142.875	0.107743
142.875	0.186216
141.938	0.186216
141.938	0.452614
140.969	0.452614
140.969	2.91342
137.859	2.91342
137.859	6.71565
125.35	6.71565
125.35	13.544
106.55	13.544
106.55	32.435
72.2612	32.435
72.2612	179.068
185.939	179.068
185.939	66.0863
154.881	66.0863
154.881	4.79847
148.688	4.79847
148.688	0.661693
146.75	0.661693
146.75	0.224192
146	0.224192
146	0
146	0.224192
147.5	0.224192
147.5	0.0242724
147	0.0242724
147	0
147	0.0242724
148	0.0242724
148	0
148	0.0242724
147.5	0.0242724
147.5	0.224192
146.75	0.224192
146.75	0.661693
150.625	0.661693
150.625	0.349887
149.5	0.349887
149.5	0.00854369
149	0.00854369
149	0
149	0.00854369
150	0.00854369
150	0
150	0.00854369
149.5	0.00854369
149.5	0.349887
151.75	0.349887
151.75	0.0784896
151	0.0784896
151	0
151	0.0784896
152.5	0.0784896
152.5	0.00887798
152	0.00887798
152	0
152	0.00887798
153	0.00887798
153	0
153	0.00887798
152.5	0.00887798
152.5	0.0784896
151.75	0.0784896
151.75	0.349887
150.625	0.349887
150.625	0.661693
148.688	0.661693
148.688	4.79847
161.074	4.79847
161.074	1.91844
157.688	1.91844
157.688	0.217239
155.625	0.217239
155.625	0.0576549
154.5	0.0576549
154.5	0.0132107
154	0.0132107
154	0
154	0.0132107
155	0.0132107
155	0
155	0.0132107
154.5	0.0132107
154.5	0.0576549
156.75	0.0576549
156.75	0.0202309
156	0.0202309
156	0
156	0.0202309
157.5	0.0202309
157.5	0.00982179
157	0.00982179
157	0
157	0.00982179
158	0.00982179
158	0
158	0.00982179
157.5	0.00982179
157.5	0.0202309
156.75	0.0202309
156.75	0.0576549
155.625	0.0576549
155.625	0.217239
159.75	0.217239
159.75	0.113261
159	0.113261
159	0
159	0.113261
160.5	0.113261
160.5	0.0225421
160	0.0225421
160	0
160	0.0225421
161	0.0225421
161	0
161	0.0225421
160.5	0.0225421
160.5	0.113261
159.75	0.113261
159.75	0.217239
157.688	0.217239
157.688	1.91844
164.461	1.91844
164.461	0.605395
162	0.605395
162	0
162	0.605395
166.922	0.605395
166.922	0.331742
163.75	0.331742
163.75	0.0260701
163	0.0260701
163	0
163	0.0260701
164.5	0.0260701
164.5	0.0021915
164	0.0021915
164	0
164	0.0021915
165	0.0021915
165	0
165	0.0021915
164.5	0.0021915
164.5	0.0260701
163.75	0.0260701
163.75	0.331742
170.094	0.331742
170.094	0.148706
167.688	0.148706
167.688	0.0467605
166.5	0.0467605
166.5	0.00686493
166	0.00686493
166	0
166	0.00686493
167	0.00686493
167	0
167	0.00686493
166.5	0.00686493
166.5	0.0467605
168.875	0.0467605
168.875	0.0172158
168	0.0172158
168	0
168	0.0172158
169.75	0.0172158
169.75	0.0111918
169	0.0111918
169	0
169	0.0111918
170.5	0.0111918
170.5	0.00052643
170	0.00052643
170	0
170	0.00052643
171	0.00052643
171	0
171	0.00052643
170.5	0.00052643
170.5	0.0111918
169.75	0.0111918
169.75	0.0172158
168.875	0.0172158
168.875	0.0467605
167.688	0.0467605
167.688	0.148706
172.5	0.148706
172.5	0.0475177
172	0.0475177
172	0
172	0.0475177
173	0.0475177
173	0
173	0.0475177
172.5	0.0475177
172.5	0.148706
170.094	0.148706
170.094	0.331742
166.922	0.331742
166.922	0.605395
164.461	0.605395
164.461	1.91844
161.074	1.91844
161.074	4.79847
154.881	4.79847
154.881	66.0863
216.998	66.0863
216.998	54.7693
185.516	54.7693
185.516	3.54503
178.75	3.54503
178.75	0.688125
175.625	0.688125
175.625	0.107587
174.5	0.107587
174.5	0.00650647
174	0.00650647
174	0
174	0.00650647
175	0.00650647
175	0
175	0.00650647
174.5	0.00650647
174.5	0.107587
176.75	0.107587
176.75	0.022032
176	0.022032
176	0
176	0.022032
177.5	0.022032
177.5	0.002914
177	0.002914
177	0
177	0.002914
178	0.002914
178	0
178	0.002914
177.5	0.002914
177.5	0.022032
176.75	0.022032
176.75	0.107587
175.625	0.107587
175.625	0.688125
181.875	0.688125
181.875	0.225401
179.875	0.225401
179.875	0.033628
179	0.033628
179	0
179	0.033628
180.75	0.033628
180.75	0.0172601
180	0.0172601
180	0
180	0.0172601
181.5	0.0172601
181.5	0.00538454
181	0.00538454
181	0
181	0.00538454
182	0.00538454
182	0
182	0.00538454
181.5	0.00538454
181.5	0.0172601
180.75	0.0172601
180.75	0.033628
179.875	0.033628
179.875	0.225401
183.875	0.225401
183.875	0.128693
183	0.128693
183	0
183	0.128693
184.75	0.128693
184.75	0.0706784
184	0.0706784
184	0
184	0.0706784
185.5	0.0706784
185.5	0.0143496
185	0.0143496
185	0
185	0.0143496
186	0.0143496
186	0
186	0.0143496
185.5	0.0143496
185.5	0.0706784
184.75	0.0706784
184.75	0.128693
183.875	0.128693
183.875	0.225401
181.875	0.225401
181.875	0.688125
178.75	0.688125
178.75	3.54503
192.281	3.54503
192.281	1.60276
188.625	1.60276
188.625	0.276038
187.5	0.276038
187.5	0.0278176
187	0.0278176
187	0
187	0.0278176
188	0.0278176
188	0
188	0.0278176
187.5	0.0278176
187.5	0.276038
189.75	0.276038
189.75	0.0568684
189	0.0568684
189	0
189	0.0568684
190.5	0.0568684
190.5	0.0260219
190	0.0260219
190	0
190	0.0260219
191	0.0260219
191	0
191	0.0260219
190.5	0.0260219
190.5	0.0568684
189.75	0.0568684
189.75	0.276038
188.625	0.276038
188.625	1.60276
195.938	1.60276
195.938	0.380647
192.875	0.380647
192.875	0.188487
192	0.188487
192	0
192	0.188487
193.75	0.188487
193.75	0.0501036
193	0.0501036
193	0
193	0.0501036
194.5	0.0501036
194.5	0.014836
194	0.014836
194	0
194	0.014836
195	0.014836
195	0
195	0.014836
194.5	0.014836
194.5	0.0501036
193.75	0.0501036
193.75	0.188487
192.875	0.188487
192.875	0.380647
199	0.380647
199	0.230331
196.75	0.230331
196.75	0.0435603
196	0.0435603
196	0
196	0.0435603
197.5	0.0435603
197.5	0.0041991
197	0.0041991
197	0
197	0.0041991
198	0.0041991
198	0
198	0.0041991
197.5	0.0041991
197.5	0.0435603
196.75	0.0435603
196.75	0.230331
201.25	0.230331
201.25	0.0469938
199.75	0.0469938
199.75	0.0165206
199	0.0165206
199	0
199	0.0165206
200.5	0.0165206
200.5	0.00627421
200	0.00627421
200	0
200	0.00627421
201	0.00627421
201	0
201	0.00627421
200.5	0.00627421
200.5	0.0165206
199.75	0.0165206
199.75	0.0469938
202.75	0.0469938
202.75	0.0190863
202	0.0190863
202	0
202	0.0190863
203.5	0.0190863
203.5	0.00387409
203	0.00387409
203	0
203	0.00387409
204	0.00387409
204	0
204	0.00387409
203.5	0.00387409
203.5	0.0190863
202.75	0.0190863
202.75	0.0469938
201.25	0.0469938
201.25	0.230331
199	0.230331
199	0.380647
195.938	0.380647
195.938	1.60276
192.281	1.60276
192.281	3.54503
185.516	3.54503
185.516	54.7693
248.48	54.7693
248.48	15.7152
216.859	15.7152
216.859	2.69488
209.656	2.69488
209.656	0.341686
206.688	0.341686
206.688	0.0546337
205.5	0.0546337
205.5	0.000991069
205	0.000991069
205	0
205	0.000991069
206	0.000991069
206	0
206	0.000991069
205.5	0.000991069
205.5	0.0546337
207.875	0.0546337
207.875	0.0150406
207	0.0150406
207	0
207	0.0150406
208.75	0.0150406
208.75	0.00664122
208	0.00664122
208	0
208	0.00664122
209.5	0.00664122
209.5	0.00228906
209	0.00228906
209	0
209	0.00228906
210	0.00228906
210	0
210	0.00228906
209.5	0.00228906
209.5	0.00664122
208.75	0.00664122
208.75	0.0150406
207.875	0.0150406
207.875	0.0546337
206.688	0.0546337
206.688	0.341686
212.625	0.341686
212.625	0.165114
211.5	0.165114
211.5	0.0186578
211	0.0186578
211	0
211	0.0186578
212	0.0186578
212	0
212	0.0186578
211.5	0.0186578
211.5	0.165114
213.75	0.165114
213.75	0.0331665
213	0.0331665
213	0
213	0.0331665
214.5	0.0331665
214.5	0.0154177
214	0.0154177
214	0
214	0.0154177
215	0.0154177
215	0
215	0.0154177
214.5	0.0154177
214.5	0.0331665
213.75	0.0331665
213.75	0.165114
212.625	0.165114
212.625	0.341686
209.656	0.341686
209.656	2.69488
224.062	2.69488
224.062	1.18334
218.312	1.18334
218.312	0.430561
216.75	0.430561
216.75	0.0291384
216	0.0291384
216	0
216	0.0291384
217.5	0.0291384
217.5	0.00469447
217	0.00469447
217	0
217	0.00469447
218	0.00469447
218	0
218	0.00469447
217.5	0.00469447
217.5	0.0291384
216.75	0.0291384
216.75	0.430561
219.875	0.430561
219.875	0.0394376
219	0.0394376
219	0
219	0.0394376
220.75	0.0394376
220.75	0.0329771
220	0.0329771
220	0
220	0.0329771
221.5	0.0329771
221.5	0.0132165
221	0.0132165
221	0
221	0.0132165
222	0.0132165
222	0
222	0.0132165
221.5	0.0132165
221.5	0.0329771
220.75	0.0329771
220.75	0.0394376
219.875	0.0394376
219.875	0.430561
218.312	0.430561
218.312	1.18334
229.812	1.18334
229.812	0.72052
225.531	0.72052
225.531	0.117577
223.75	0.117577
223.75	0.0115449
223	0.0115449
223	0
223	0.0115449
224.5	0.0115449
224.5	0.00711901
224	0.00711901
224	0
224	0.00711901
225	0.00711901
225	0
225	0.00711901
224.5	0.00711901
224.5	0.0115449
223.75	0.0115449
223.75	0.117577
227.312	0.117577
227.312	0.0432768
226	0.0432768
226	0
226	0.0432768
228.625	0.0432768
228.625	0.0363098
227.5	0.0363098
227.5	0.0100008
227	0.0100008
227	0
227	0.0100008
228	0.0100008
228	0
228	0.0100008
227.5	0.0100008
227.5	0.0363098
229.75	0.0363098
229.75	0.0107941
229	0.0107941
229	0
229	0.0107941
230.5	0.0107941
230.5	0.00325893
230	0.00325893
230	0
230	0.00325893
231	0.00325893
231	0
231	0.00325893
230.5	0.00325893
230.5	0.0107941
229.75	0.0107941
229.75	0.0363098
228.625	0.0363098
228.625	0.0432768
227.312	0.0432768
227.312	0.117577
225.531	0.117577
225.531	0.72052
234.094	0.72052
234.094	0.229719
232.5	0.229719
232.5	0.0220776
232	0.0220776
232	0
232	0.0220776
233	0.0220776
233	0
233	0.0220776
232.5	0.0220776
232.5	0.229719
235.688	0.229719
235.688	0.0308685
234.5	0.0308685
234.5	0.0045321
234	0.0045321
234	0
234	0.0045321
235	0.0045321
235	0
235	0.0045321
234.5	0.0045321
234.5	0.0308685
236.875	0.0308685
236.875	0.0185101
236	0.0185101
236	0
236	0.0185101
237.75	0.0185101
237.75	0.00649683
237	0.00649683
237	0
237	0.00649683
238.5	0.00649683
238.5	0.00587701
238	0.00587701
238	0
238	0.00587701
239	0.00587701
239	0
239	0.00587701
238.5	0.00587701
238.5	0.00649683
237.75	0.00649683
237.75	0.0185101
236.875	0.0185101
236.875	0.0308685
235.688	0.0308685
235.688	0.229719
234.094	0.229719
234.094	0.72052
229.812	0.72052
229.812	1.18334
224.062	1.18334
224.062	2.69488
216.859	2.69488
216.859	15.7152
280.1	15.7152
280.1	12.0697
254.016	12.0697
254.016	1.97731
242.984	1.97731
242.984	0.21266
240.75	0.21266
240.75	0.0126779
240	0.0126779
240	0
240	0.0126779
241.5	0.0126779
241.5	0.00974901
241	0.00974901
241	0
241	0.00974901
242	0.00974901
242	0
242	0.00974901
241.5	0.00974901
241.5	0.0126779
240.75	0.0126779
240.75	0.21266
245.219	0.21266
245.219	0.102175
243	0.102175
243	0
243	0.102175
247.438	0.102175
247.438	0.0625609
244.875	0.0625609
244.875	0.0130711
244	0.0130711
244	0
244	0.0130711
245.75	0.0130711
245.75	0.00655802
245	0.00655802
245	0
245	0.00655802
246.5	0.00655802
246.5	0.00171741
246	0.00171741
246	0
246	0.00171741
247	0.00171741
247	0
247	0.00171741
246.5	0.00171741
246.5	0.00655802
245.75	0.00655802
245.75	0.0130711
244.875	0.0130711
244.875	0.0625609
250	0.0625609
250	0.0421505
248.5	0.0421505
248.5	0.0178745
248	0.0178745
248	0
248	0.0178745
249	0.0178745
249	0
249	0.0178745
248.5	0.0178745
248.5	0.0421505
251.5	0.0421505
251.5	0.0223807
250.5	0.0223807
250.5	0.00613154
250	0.00613154
250	0
250	0.00613154
251	0.00613154
251	0
251	0.00613154
250.5	0.00613154
250.5	0.0223807
252.5	0.0223807
252.5	0.00666763
252	0.00666763
252	0
252	0.00666763
253	0.00666763
253	0
253	0.00666763
252.5	0.00666763
252.5	0.0223807
251.5	0.0223807
251.5	0.0421505
250	0.0421505
250	0.0625609
247.438	0.0625609
247.438	0.102175
245.219	0.102175
245.219	0.21266
242.984	0.21266
242.984	1.97731
265.047	1.97731
265.047	0.575235
257.75	0.575235
257.75	0.131987
255.625	0.131987
255.625	0.0139646
254.5	0.0139646
254.5	0.00487807
254	0.00487807
254	0
254	0.00487807
255	0.00487807
255	0
255	0.00487807
254.5	0.00487807
254.5	0.0139646
256.75	0.0139646
256.75	0.00593741
256	0.00593741
256	0
256	0.00593741
257.5	0.00593741
257.5	0.0019102
257	0.0019102
257	0
257	0.0019102
258	0.0019102
258	0
258	0.0019102
257.5	0.0019102
257.5	0.00593741
256.75	0.00593741
256.75	0.0139646
255.625	0.0139646
255.625	0.131987
259.875	0.131987
259.875	0.0296032
259	0.0296032
259	0
259	0.0296032
260.75	0.0296032
260.75	0.0165755
260	0.0165755
260	0
260	0.0165755
261.5	0.0165755
261.5	0.0097729
261	0.0097729
261	0
261	0.0097729
262	0.0097729
262	0
262	0.0097729
261.5	0.0097729
261.5	0.0165755
260.75	0.0165755
260.75	0.0296032
259.875	0.0296032
259.875	0.131987
257.75	0.131987
257.75	0.575235
272.344	0.575235
272.344	0.490677
265.938	0.490677
265.938	0.126417
263.75	0.126417
263.75	0.0142829
263	0.0142829
263	0
263	0.0142829
264.5	0.0142829
264.5	0.00576476
264	0.00576476
264	0
264	0.00576476
265	0.00576476
265	0
265	0.00576476
264.5	0.00576476
264.5	0.0142829
263.75	0.0142829
263.75	0.126417
268.125	0.126417
268.125	0.0239084
266.75	0.0239084
266.75	0.00739184
266	0.00739184
266	0
266	0.00739184
267.5	0.00739184
267.5	0.00168693
267	0.00168693
267	0
267	0.00168693
268	0.00168693
268	0
268	0.00168693
267.5	0.00168693
267.5	0.00739184
266.75	0.00739184
266.75	0.0239084
269.5	0.0239084
269.5	0.0112985
269	0.0112985
269	0
269	0.0112985
270	0.0112985
270	0
270	0.0112985
269.5	0.0112985
269.5	0.0239084
268.125	0.0239084
268.125	0.126417
265.938	0.126417
265.938	0.490677
278.75	0.490677
278.75	0.342952
274.812	0.342952
274.812	0.0694262
272.5	0.0694262
272.5	0.0252442
271.5	0.0252442
271.5	0.00521187
271	0.00521187
271	0
271	0.00521187
272	0.00521187
272	0
272	0.00521187
271.5	0.00521187
271.5	0.0252442
273.5	0.0252442
273.5	0.0140856
273	0.0140856
273	0
273	0.0140856
274	0.0140856
274	0
274	0.0140856
273.5	0.0140856
273.5	0.0252442
272.5	0.0252442
272.5	0.0694262
277.125	0.0694262
277.125	0.0424939
275.75	0.0424939
275.75	0.00746039
275	0.00746039
275	0
275	0.00746039
276.5	0.00746039
276.5	0.0026916
276	0.0026916
276	0
276	0.0026916
277	0.0026916
277	0
277	0.0026916
276.5	0.0026916
276.5	0.00746039
275.75	0.00746039
275.75	0.0424939
278.5	0.0424939
278.5	0.0331214
278	0.0331214
278	0
278	0.0331214
279	0.0331214
279	0
279	0.0331214
278.5	0.0331214
278.5	0.0424939
277.125	0.0424939
277.125	0.0694262
274.812	0.0694262
274.812	0.342952
282.688	0.342952
282.688	0.118353
280.875	0.118353
280.875	0.0105782
280	0.0105782
280	0
280	0.0105782
281.75	0.0105782
281.75	0.00703025
281	0.00703025
281	0
281	0.00703025
282.5	0.00703025
282.5	0.00289283
282	0.00289283
282	0
282	0.00289283
283	0.00289283
283	0
283	0.00289283
282.5	0.00289283
282.5	0.00703025
281.75	0.00703025
281.75	0.0105782
280.875	0.0105782
280.875	0.118353
284.5	0.118353
284.5	0.0119606
284	0.0119606
284	0
284	0.0119606
285	0.0119606
285	0
285	0.0119606
284.5	0.0119606
284.5	0.118353
282.688	0.118353
282.688	0.342952
278.75	0.342952
278.75	0.490677
272.344	0.490677
272.344	0.575235
265.047	0.575235
265.047	1.97731
254.016	1.97731
254.016	12.0697
306.185	12.0697
306.185	5.61571
291.336	5.61571
291.336	0.318005
287.625	0.318005
287.625	0.0725938
286.5	0.0725938
286.5	0.0177452
286	0.0177452
286	0
286	0.0177452
287	0.0177452
287	0
287	0.0177452
[truncated: 1,655 more rows]

## Sheet: AHC_HID3
32.8945	111.864	1	0					1.75	111.864	1	17
10.4453	111.864	2	0					1	111.864	2	17
10.4453	15.9597	3	0					1	0	3	17
3.3125	15.9597	4	0					1	111.864
3.3125	4.98569	5	0					2.5	111.864
1.75	4.98569	6	0					2.5	18.1561
1.75	0.904302	7	0					2	18.1561
1	0.904302	8	0					2	0
1	0	9	0					2	18.1561
1	0.904302	10	0					3	18.1561
2.5	0.904302	11	0					3	0
2.5	0.231739	12	0					3	18.1561
2	0.231739	13	0					2.5	18.1561
2	0	14	0					2.5	111.864
2	0.231739	15	0					1.75	111.864
3	0.231739	16	0
3	0	17	0
3	0.231739	18	0
2.5	0.231739	19	0
2.5	0.904302	20	0
1.75	0.904302	21	0
1.75	4.98569	22	0
4.875	4.98569	23	0
4.875	1.24745	24	0
4	1.24745	25	0
4	0	26	0
4	1.24745	27	0
5.75	1.24745	28	0
5.75	0.387219	29	0
5	0.387219	30	0
5	0	31	0
5	0.387219	32	0
6.5	0.387219	33	0
6.5	0.180047	34	0
6	0.180047	35	0
6	0	36	0
6	0.180047	37	0
7	0.180047	38	0
7	0	39	0
7	0.180047	40	0
6.5	0.180047	41	0
6.5	0.387219	42	0
5.75	0.387219	43	0
5.75	1.24745	44	0
4.875	1.24745	45	0
4.875	4.98569	46	0
3.3125	4.98569	47	0
3.3125	15.9597	48	0
17.5781	15.9597	49	0
17.5781	11.449	50	0
11.0938	11.449	51	0
11.0938	1.5453	52	0
8.875	1.5453	53	0
8.875	0.253243	54	0
8	0.253243	55	0
8	0	56	0
8	0.253243	57	0
9.75	0.253243	58	0
9.75	0.0561254	59	0
9	0.0561254	60	0
9	0	61	0
9	0.0561254	62	0
10.5	0.0561254	63	0
10.5	0.0130767	64	0
10	0.0130767	65	0
10	0	66	0
10	0.0130767	67	0
11	0.0130767	68	0
11	0	69	0
11	0.0130767	70	0
10.5	0.0130767	71	0
10.5	0.0561254	72	0
9.75	0.0561254	73	0
9.75	0.253243	74	0
8.875	0.253243	75	0
8.875	1.5453	76	0
13.3125	1.5453	77	0
13.3125	0.983511	78	0
12	0.983511	79	0
12	0	80	0
12	0.983511	81	0
14.625	0.983511	82	0
14.625	0.304886	83	0
13.5	0.304886	84	0
13.5	0.108912	85	0
13	0.108912	86	0
13	0	87	0
13	0.108912	88	0
14	0.108912	89	0
14	0	90	0
14	0.108912	91	0
13.5	0.108912	92	0
13.5	0.304886	93	0
15.75	0.304886	94	0
15.75	0.154538	95	0
15	0.154538	96	0
15	0	97	0
15	0.154538	98	0
16.5	0.154538	99	0
16.5	0.100509	100	0
16	0.100509	101	0
16	0	102	0
16	0.100509	103	0
17	0.100509	104	0
17	0	105	0
17	0.100509
16.5	0.100509
16.5	0.154538
15.75	0.154538
15.75	0.304886
14.625	0.304886
14.625	0.983511
13.3125	0.983511
13.3125	1.5453
11.0938	1.5453
11.0938	11.449
24.0625	11.449
24.0625	2.74566
21.1875	2.74566
21.1875	0.698145
19.5	0.698145
19.5	0.144558
18.5	0.144558
18.5	0.0429824
18	0.0429824
18	0
18	0.0429824
19	0.0429824
19	0
19	0.0429824
18.5	0.0429824
18.5	0.144558
20.5	0.144558
20.5	0.0637168
20	0.0637168
20	0
20	0.0637168
21	0.0637168
21	0
21	0.0637168
20.5	0.0637168
20.5	0.144558
19.5	0.144558
19.5	0.698145
22.875	0.698145
22.875	0.159917
22	0.159917
22	0
22	0.159917
23.75	0.159917
23.75	0.0678494
23	0.0678494
23	0
23	0.0678494
24.5	0.0678494
24.5	0.0383719
24	0.0383719
24	0
24	0.0383719
25	0.0383719
25	0
25	0.0383719
24.5	0.0383719
24.5	0.0678494
23.75	0.0678494
23.75	0.159917
22.875	0.159917
22.875	0.698145
21.1875	0.698145
21.1875	2.74566
26.9375	2.74566
26.9375	1.36937
26	1.36937
26	0
26	1.36937
27.875	1.36937
27.875	0.997666
27	0.997666
27	0
27	0.997666
28.75	0.997666
28.75	0.22558
28	0.22558
28	0
28	0.22558
29.5	0.22558
29.5	0.103179
29	0.103179
29	0
29	0.103179
30	0.103179
30	0
30	0.103179
29.5	0.103179
29.5	0.22558
28.75	0.22558
28.75	0.997666
27.875	0.997666
27.875	1.36937
26.9375	1.36937
26.9375	2.74566
24.0625	2.74566
24.0625	11.449
17.5781	11.449
17.5781	15.9597
10.4453	15.9597
10.4453	111.864
55.3438	111.864
55.3438	18.1561
41.7188	18.1561
41.7188	3.61201
36.8125	3.61201
36.8125	1.30768
33.3125	1.30768
33.3125	0.541057
31.5	0.541057
31.5	0.0212948
31	0.0212948
31	0
31	0.0212948
32	0.0212948
32	0
32	0.0212948
31.5	0.0212948
31.5	0.541057
35.125	0.541057
35.125	0.09226
33.75	0.09226
33.75	0.0201859
33	0.0201859
33	0
33	0.0201859
34.5	0.0201859
34.5	0.00182367
34	0.00182367
34	0
34	0.00182367
35	0.00182367
35	0
35	0.00182367
34.5	0.00182367
34.5	0.0201859
33.75	0.0201859
33.75	0.09226
36.5	0.09226
36.5	0.0377155
36	0.0377155
36	0
36	0.0377155
37	0.0377155
37	0
37	0.0377155
36.5	0.0377155
36.5	0.09226
35.125	0.09226
35.125	0.541057
33.3125	0.541057
33.3125	1.30768
40.3125	1.30768
40.3125	0.556839
38.75	0.556839
38.75	0.122606
38	0.122606
38	0
38	0.122606
39.5	0.122606
39.5	0.0304512
39	0.0304512
39	0
39	0.0304512
40	0.0304512
40	0
40	0.0304512
39.5	0.0304512
39.5	0.122606
38.75	0.122606
38.75	0.556839
41.875	0.556839
41.875	0.180236
41	0.180236
41	0
41	0.180236
42.75	0.180236
42.75	0.0213932
42	0.0213932
42	0
42	0.0213932
43.5	0.0213932
43.5	0.0111124
43	0.0111124
43	0
43	0.0111124
44	0.0111124
44	0
44	0.0111124
43.5	0.0111124
43.5	0.0213932
42.75	0.0213932
42.75	0.180236
41.875	0.180236
41.875	0.556839
40.3125	0.556839
40.3125	1.30768
36.8125	1.30768
36.8125	3.61201
46.625	3.61201
46.625	1.71291
45.5	1.71291
45.5	0.112993
45	0.112993
45	0
45	0.112993
46	0.112993
46	0
46	0.112993
45.5	0.112993
45.5	1.71291
47.75	1.71291
47.75	0.253663
47	0.253663
47	0
47	0.253663
48.5	0.253663
48.5	0.131804
48	0.131804
48	0
48	0.131804
49	0.131804
49	0
49	0.131804
48.5	0.131804
48.5	0.253663
47.75	0.253663
47.75	1.71291
46.625	1.71291
46.625	3.61201
41.7188	3.61201
41.7188	18.1561
68.9688	18.1561
68.9688	15.7064
54.9375	15.7064
54.9375	2.37087
50.875	2.37087
50.875	0.337717
50	0.337717
50	0
50	0.337717
51.75	0.337717
51.75	0.178125
51	0.178125
51	0
51	0.178125
52.5	0.178125
52.5	0.058696
52	0.058696
52	0
52	0.058696
53	0.058696
53	0
53	0.058696
52.5	0.058696
52.5	0.178125
51.75	0.178125
51.75	0.337717
50.875	0.337717
50.875	2.37087
59	2.37087
59	1.56681
56	1.56681
56	0.29229
54.5	0.29229
54.5	0.0317946
54	0.0317946
54	0
54	0.0317946
55	0.0317946
55	0
55	0.0317946
54.5	0.0317946
54.5	0.29229
57.5	0.29229
57.5	0.0988486
56.5	0.0988486
56.5	0.0068487
56	0.0068487
56	0
56	0.0068487
57	0.0068487
57	0
57	0.0068487
56.5	0.0068487
56.5	0.0988486
58.5	0.0988486
58.5	0.0397566
58	0.0397566
58	0
58	0.0397566
59	0.0397566
59	0
59	0.0397566
58.5	0.0397566
58.5	0.0988486
57.5	0.0988486
57.5	0.29229
56	0.29229
56	1.56681
62	1.56681
62	0.50213
60.5	0.50213
60.5	0.0302815
60	0.0302815
60	0
60	0.0302815
61	0.0302815
61	0
61	0.0302815
60.5	0.0302815
60.5	0.50213
63.5	0.50213
63.5	0.198357
62.5	0.198357
62.5	0.00835807
62	0.00835807
62	0
62	0.00835807
63	0.00835807
63	0
63	0.00835807
62.5	0.00835807
62.5	0.198357
64.5	0.198357
64.5	0.0482843
64	0.0482843
64	0
64	0.0482843
65	0.0482843
65	0
65	0.0482843
64.5	0.0482843
64.5	0.198357
63.5	0.198357
63.5	0.50213
62	0.50213
62	1.56681
59	1.56681
59	2.37087
54.9375	2.37087
54.9375	15.7064
83	15.7064
83	5.29406
74.3125	5.29406
74.3125	1.31562
69.1875	1.31562
69.1875	0.183917
67.5	0.183917
67.5	0.0462542
66.5	0.0462542
66.5	0.0106388
66	0.0106388
66	0
66	0.0106388
67	0.0106388
67	0
67	0.0106388
66.5	0.0106388
66.5	0.0462542
68.5	0.0462542
68.5	0.0164705
68	0.0164705
68	0
68	0.0164705
69	0.0164705
69	0
69	0.0164705
68.5	0.0164705
68.5	0.0462542
67.5	0.0462542
67.5	0.183917
70.875	0.183917
70.875	0.0938056
70	0.0938056
70	0
70	0.0938056
71.75	0.0938056
71.75	0.0438338
71	0.0438338
71	0
71	0.0438338
72.5	0.0438338
72.5	0.0136115
72	0.0136115
72	0
72	0.0136115
73	0.0136115
73	0
73	0.0136115
72.5	0.0136115
72.5	0.0438338
71.75	0.0438338
71.75	0.0938056
70.875	0.0938056
70.875	0.183917
69.1875	0.183917
69.1875	1.31562
79.4375	1.31562
79.4375	0.817634
76.25	0.817634
76.25	0.136673
74.75	0.136673
74.75	0.0408418
74	0.0408418
74	0
74	0.0408418
75.5	0.0408418
75.5	0.0167009
75	0.0167009
75	0
75	0.0167009
76	0.0167009
76	0
76	0.0167009
75.5	0.0167009
75.5	0.0408418
74.75	0.0408418
74.75	0.136673
77.75	0.136673
77.75	0.0550316
77	0.0550316
77	0
77	0.0550316
78.5	0.0550316
78.5	0.0261887
78	0.0261887
78	0
78	0.0261887
79	0.0261887
79	0
79	0.0261887
78.5	0.0261887
78.5	0.0550316
77.75	0.0550316
77.75	0.136673
76.25	0.136673
76.25	0.817634
82.625	0.817634
82.625	0.24153
80.75	0.24153
80.75	0.0294586
80	0.0294586
80	0
80	0.0294586
81.5	0.0294586
81.5	0.00244386
81	0.00244386
81	0
81	0.00244386
82	0.00244386
82	0
82	0.00244386
81.5	0.00244386
81.5	0.0294586
80.75	0.0294586
80.75	0.24153
84.5	0.24153
84.5	0.0830392
83.5	0.0830392
83.5	0.0115216
83	0.0115216
83	0
83	0.0115216
84	0.0115216
84	0
84	0.0115216
83.5	0.0115216
83.5	0.0830392
85.5	0.0830392
85.5	0.0307543
85	0.0307543
85	0
85	0.0307543
86	0.0307543
86	0
86	0.0307543
85.5	0.0307543
85.5	0.0830392
84.5	0.0830392
84.5	0.24153
82.625	0.24153
82.625	0.817634
79.4375	0.817634
79.4375	1.31562
74.3125	1.31562
74.3125	5.29406
91.6875	5.29406
91.6875	1.34079
87.5	1.34079
87.5	0.0936978
87	0.0936978
87	0
87	0.0936978
88	0.0936978
88	0
88	0.0936978
87.5	0.0936978
87.5	1.34079
95.875	1.34079
95.875	0.885892
91.625	0.885892
91.625	0.113505
89.75	0.113505
89.75	0.0139649
89	0.0139649
89	0
89	0.0139649
90.5	0.0139649
90.5	0.00453635
90	0.00453635
90	0
90	0.00453635
91	0.00453635
91	0
91	0.00453635
90.5	0.00453635
90.5	0.0139649
89.75	0.0139649
89.75	0.113505
93.5	0.113505
93.5	0.0471372
92.5	0.0471372
92.5	0.00834695
92	0.00834695
92	0
92	0.00834695
93	0.00834695
93	0
93	0.00834695
92.5	0.00834695
92.5	0.0471372
94.5	0.0471372
94.5	0.00908116
94	0.00908116
94	0
94	0.00908116
95	0.00908116
95	0
95	0.00908116
94.5	0.00908116
94.5	0.0471372
93.5	0.0471372
93.5	0.113505
91.625	0.113505
91.625	0.885892
100.125	0.885892
100.125	0.324026
97.625	0.324026
97.625	0.112694
96.5	0.112694
96.5	0.028193
96	0.028193
96	0
96	0.028193
97	0.028193
97	0
97	0.028193
96.5	0.028193
96.5	0.112694
98.75	0.112694
98.75	0.0316521
98	0.0316521
98	0
98	0.0316521
99.5	0.0316521
99.5	0.0134763
99	0.0134763
99	0
99	0.0134763
100	0.0134763
100	0
100	0.0134763
99.5	0.0134763
99.5	0.0316521
98.75	0.0316521
98.75	0.112694
97.625	0.112694
97.625	0.324026
102.625	0.324026
102.625	0.192078
101.5	0.192078
101.5	0.0104765
101	0.0104765
101	0
101	0.0104765
102	0.0104765
102	0
102	0.0104765
101.5	0.0104765
101.5	0.192078
103.75	0.192078
103.75	0.0329708
103	0.0329708
103	0
103	0.0329708
104.5	0.0329708
104.5	0.00650444
104	0.00650444
104	0
104	0.00650444
105	0.00650444
105	0
105	0.00650444
104.5	0.00650444
104.5	0.0329708
103.75	0.0329708
103.75	0.192078
102.625	0.192078
102.625	0.324026
100.125	0.324026
100.125	0.885892
95.875	0.885892
95.875	1.34079
91.6875	1.34079
91.6875	5.29406
83	5.29406
83	15.7064
68.9688	15.7064
68.9688	18.1561
55.3438	18.1561
55.3438	111.864
32.8945	111.864

## Sheet: AHC
	XLSTAT 2019.2.3.59875 - Agglomerative hierarchical clustering (AHC) - Start time: 06/01/2020 at 09:28:35 / End time: 06/01/2020 at 09:28:40 / Microsoft Excel 15.05127
	Observations/variables table: Workbook = Powick July2019 LOG DATA.xlsx / Sheet = Log Data / Range = 'Log Data'!$G$2:$K$525 / 523 rows and 5 columns
	Row labels: Workbook = Powick July2019 LOG DATA.xlsx / Sheet = Log Data / Range = 'Log Data'!$A$2:$A$525 / 523 rows and 1 column
	Cluster rows
	Dissimilarity: Euclidean distance
	Agglomeration method: Ward's method
	Center: Yes
	Reduce: No
	Truncation: Automatic - Entropy
	Summary statistics:
	Variable	Observations	Obs. with missing data	Obs. without missing data	Minimum	Maximum	Mean	Std. deviation
	Grain Size	105	0	105	-0.996244	2.73771	-0.0215857	0.972763
	Zr:Rb	105	0	105	-1.28162	3.74538	0.00460087	0.998576
	Net IRSL (x10^⁻⁴)	105	0	105	-1.53816	4.18036	3.03861e-16	1
	Net OSL (x10^⁻⁴)	105	0	105	-1.61938	3.76899	-3.20858e-16	1
	IRSL:OSL	105	0	105	-2.13376	2.75294	6.33352e-16	1
	Proximity matrix (Euclidean distance):
		5	10	15	20	25	30	35	40	45	50	55	60	65	70	75	80	85	90	95	100	105	110	115	120	125	130	135	140	145	150	155	160	165	170	175	180	185	190	195	200	205	210	215	220	225	230	235	240
	5	0	1.39083	0.859626	1.29589	0.918986	1.30583	1.17162	2.33551	1.42958	1.18326	1.23911	1.02021	2.37424	0.852482	1.75185	2.20793	1.25712	1.28204	1.58011	1.86983	0.971967	1.17546	2.07966	1.85386	1.66277	2.1424	2.2857	2.94236	3.54143	3.19722	2.26935	1.58008	2.5421	2.76171	2.45256	2.97597	3.59327	3.00903	3.63781	3.537	3.93664	2.98768	1.25058	1.36489	1.24255	1.96736	2.63437	2.95579
	10	1.39083	0	0.551486	0.466717	0.90383	1.82838	0.565427	2.72726	1.5078	0.81331	1.72195	1.19409	2.67971	1.44756	2.91828	3.21251	0.579933	0.729766	1.57843	1.96421	0.829337	1.50239	2.47867	2.27711	2.22192	2.67936	2.62768	3.27495	3.96094	3.59006	2.67424	1.79739	2.85692	2.99021	2.94383	3.54005	4.26694	3.34469	4.18741	4.17323	4.15786	3.33982	2.0035	1.56038	1.75664	2.73071	3.14196	3.54748
	15	0.859626	0.551486	0	0.583976	0.570587	1.41558	0.448349	2.40117	1.20616	0.690939	1.36103	0.896115	2.39242	1.04793	2.38501	2.71703	0.633258	0.73424	1.40973	1.79487	0.663942	1.21979	2.21029	1.98567	1.8854	2.36998	2.39623	3.06652	3.73951	3.36923	2.42168	1.54049	2.62619	2.80248	2.63521	3.21478	3.92184	3.12021	3.87526	3.84083	3.99229	3.10552	1.58937	1.29672	1.42613	2.34258	2.86434	3.23263
	20	1.29589	0.466717	0.583976	0	0.591327	1.71469	0.479385	2.70676	1.53962	1.14284	1.93827	1.43687	2.89272	1.61289	2.78532	3.20329	0.935889	1.08823	1.911	2.29906	0.958139	1.74246	2.75967	2.54251	2.45249	2.93141	2.92953	3.59091	4.26439	3.89624	2.96221	2.08251	3.16451	3.32278	3.19793	3.78065	4.49745	3.65866	4.4383	4.41489	4.50806	3.64871	2.16285	1.83845	1.975	2.90675	3.41418	3.79803
	25	0.918986	0.90383	0.570587	0.591327	0	1.21348	0.488419	2.28698	1.2202	1.25222	1.75703	1.39477	2.65259	1.45674	2.22306	2.70987	1.18698	1.29949	1.93029	2.30951	1.10344	1.70321	2.65687	2.41841	2.29315	2.78434	2.86873	3.54142	4.20263	3.83534	2.88135	1.99718	3.07829	3.28163	3.00923	3.55313	4.25027	3.57035	4.20788	4.18279	4.46596	3.5453	1.93098	1.77325	1.86777	2.62073	3.29803	3.61724
	30	1.30583	1.82838	1.41558	1.71469	1.21348	0	1.30533	1.12358	0.680792	1.7914	1.66249	1.75015	1.98367	1.6844	1.41109	1.754	1.9454	1.97803	2.13418	2.44583	1.97476	2.03319	2.56393	2.31456	2.19949	2.6267	2.845	3.47189	4.11607	3.75297	2.83692	1.98345	2.91079	3.17863	2.61923	3.02012	3.69002	3.35208	3.59589	3.64349	4.24188	3.28575	1.83962	1.89368	2.04236	2.0886	3.16316	3.28982
	35	1.17162	0.565427	0.448349	0.479385	0.488419	1.30533	0	2.24645	1.07344	1.01083	1.65794	1.27273	2.4817	1.43689	2.48144	2.82757	0.941788	1.05754	1.72425	2.12132	1.07572	1.62308	2.53507	2.30345	2.22331	2.70195	2.73683	3.40335	4.09453	3.71708	2.76758	1.82821	2.92169	3.10419	2.89219	3.4511	4.1818	3.41416	4.09317	4.1008	4.27097	3.38969	1.93065	1.61562	1.8164	2.57594	3.20964	3.54055
	40	2.33551	2.72726	2.40117	2.70676	2.28698	1.12358	2.24645	0	1.297	2.60084	2.23952	2.54327	1.83668	2.48397	1.76495	1.66432	2.81548	2.81675	2.73439	2.96867	2.95352	2.79378	2.95773	2.7427	2.69011	2.99466	3.24823	3.77361	4.38502	4.04023	3.2404	2.49383	3.16909	3.44364	2.74981	2.9671	3.58301	3.52042	3.38534	3.54767	4.29981	3.42311	2.45104	2.5176	2.73888	2.22441	3.48312	3.44203
	45	1.42958	1.5078	1.20616	1.53962	1.2202	0.680792	1.07344	1.297	0	1.40468	1.39003	1.44497	1.62359	1.5013	1.89457	1.9976	1.59617	1.60936	1.71946	2.05116	1.79168	1.77251	2.24919	2.00494	1.95355	2.37012	2.5211	3.14301	3.83021	3.45205	2.53707	1.59258	2.55431	2.79723	2.33323	2.78585	3.52459	3.00834	3.37171	3.45692	3.85965	2.94701	1.68077	1.52356	1.81707	2.06251	2.90311	3.0595
	50	1.18326	0.81331	0.690939	1.14284	1.25222	1.7914	1.01083	2.60084	1.40468	0	0.988793	0.436776	2.09404	0.770719	2.62948	2.75438	0.346047	0.248403	0.774658	1.16202	0.691985	0.744661	1.66781	1.4735	1.43054	1.87362	1.81569	2.46824	3.15586	2.78272	1.86133	1.00973	2.05415	2.19183	2.17076	2.78069	3.49185	2.54251	3.43454	3.39496	3.37458	2.54075	1.28003	0.761618	0.991204	2.0892	2.3294	2.74453
	55	1.23911	1.72195	1.36103	1.93827	1.75703	1.66249	1.65794	2.23952	1.39003	0.988793	0	0.633347	1.3824	0.530024	2.05867	1.951	1.31511	1.20248	0.660994	0.836221	1.40611	0.662725	0.952346	0.707127	0.608355	1.07413	1.20423	1.86218	2.53014	2.15652	1.2068	0.427932	1.36564	1.59951	1.29901	1.87697	2.56813	1.84284	2.54117	2.48397	2.75583	1.81113	0.454267	0.399107	0.538474	1.21112	1.60003	1.89954
	60	1.02021	1.19409	0.896115	1.43687	1.39477	1.75015	1.27273	2.54327	1.44497	0.436776	0.633347	0	1.90688	0.356979	2.36219	2.4504	0.719825	0.609224	0.585018	0.929439	0.807494	0.371596	1.3346	1.12762	1.03985	1.50658	1.50377	2.17379	2.84377	2.47387	1.52972	0.730983	1.7645	1.93149	1.84793	2.45486	3.13844	2.25429	3.12247	3.04897	3.13118	2.25014	0.856715	0.456681	0.574637	1.76123	1.97975	2.38709
	65	2.37424	2.67971	2.39242	2.89272	2.65259	1.98367	2.4817	1.83668	1.62359	2.09404	1.3824	1.90688	0	1.88656	2.27705	1.67668	2.43092	2.33139	1.69853	1.72481	2.67097	1.99852	1.52041	1.39699	1.48929	1.56616	1.7813	2.15289	2.75187	2.41641	1.78647	1.3481	1.53207	1.78882	1.11725	1.3534	2.09943	1.81435	1.83408	2.02506	2.53491	1.71123	1.55699	1.56131	1.85354	1.51231	1.95381	1.84667
	70	0.852482	1.44756	1.04793	1.61289	1.45674	1.6844	1.43689	2.48397	1.5013	0.770719	0.530024	0.356979	1.88656	0	2.10111	2.21073	1.01605	0.927374	0.773908	1.02093	0.947153	0.381563	1.27082	1.05529	0.896107	1.38276	1.4605	2.12936	2.76519	2.40569	1.45947	0.786001	1.73405	1.93078	1.75093	2.33275	2.97866	2.21086	3.00549	2.90073	3.12117	2.20094	0.606268	0.563123	0.421601	1.54857	1.8693	2.25166
	75	1.75185	2.91828	2.38501	2.78532	2.22306	1.41109	2.48144	1.76495	1.89457	2.62948	2.05867	2.36219	2.27705	2.10111	0	0.925636	2.83726	2.82554	2.69187	2.85658	2.68903	2.45939	2.68128	2.47933	2.29782	2.59388	2.95771	3.46789	3.94585	3.65294	2.89579	2.42588	3.00635	3.30859	2.57834	2.79533	3.24724	3.34743	3.30188	3.25571	4.23759	3.27345	1.92498	2.40146	2.32124	2.01054	3.045	3.02012
	80	2.20793	3.21251	2.71703	3.20329	2.70987	1.754	2.82757	1.66432	1.9976	2.75438	1.951	2.4504	1.67668	2.21073	0.925636	0	3.03902	2.98518	2.58508	2.6594	3.00754	2.50751	2.3399	2.17983	2.06206	2.22022	2.61931	3.02228	3.46339	3.18874	2.55492	2.23384	2.54015	2.84814	2.00554	2.06925	2.48576	2.79693	2.48706	2.50251	3.60743	2.70081	1.83718	2.31632	2.3059	1.62417	2.61546	2.43708
	85	1.25712	0.579933	0.633258	0.935889	1.18698	1.9454	0.941788	2.81548	1.59617	0.346047	1.31511	0.719825	2.43092	1.01605	2.83726	3.03902	0	0.16172	1.06776	1.43199	0.518531	0.972002	1.96869	1.78698	1.73598	2.17488	2.09063	2.73115	3.40445	3.0393	2.13852	1.34205	2.3569	2.47358	2.5043	3.11726	3.8192	2.8392	3.7709	3.72164	3.65181	2.84542	1.57374	1.08779	1.24783	2.37845	2.60955	3.0536
	90	1.28204	0.729766	0.73424	1.08823	1.29949	1.97803	1.05754	2.81675	1.60936	0.248403	1.20248	0.609224	2.33139	0.927374	2.82554	2.98518	0.16172	0	0.912106	1.27211	0.578323	0.844277	1.81688	1.64107	1.59895	2.02821	1.93353	2.57141	3.2463	2.88063	1.98359	1.20172	2.20103	2.31363	2.36359	2.97911	3.67819	2.68158	3.63116	3.5788	3.49139	2.6895	1.46433	0.949787	1.12143	2.27933	2.45633	2.9051
	95	1.58011	1.57843	1.40973	1.911	1.93029	2.13418	1.72425	2.73439	1.71946	0.774658	0.660994	0.585018	1.69853	0.773908	2.69187	2.58508	1.06776	0.912106	0	0.400095	1.29322	0.550863	0.933941	0.78128	0.825246	1.17595	1.06325	1.70539	2.40734	2.0285	1.1222	0.395418	1.29097	1.41736	1.49353	2.11323	2.80537	1.77358	2.75499	2.6987	2.60361	1.77821	0.922412	0.292515	0.624981	1.70214	1.59594	2.02365
	100	1.86983	1.96421	1.79487	2.29906	2.30951	2.44583	2.12132	2.96867	2.05116	1.16202	0.836221	0.929439	1.72481	1.02093	2.85658	2.6594	1.43199	1.27211	0.400095	0	1.61196	0.752466	0.633458	0.579273	0.696167	0.897548	0.690785	1.31426	2.01509	1.63765	0.7657	0.504587	0.955958	1.04656	1.27319	1.88076	2.52927	1.41865	2.50233	2.4165	2.23606	1.43833	0.97792	0.575506	0.710324	1.65542	1.24235	1.71032
	105	0.971967	0.829337	0.663942	0.958139	1.10344	1.97476	1.07572	2.95352	1.79168	0.691985	1.40611	0.807494	2.67097	0.947153	2.68903	3.00754	0.518531	0.578323	1.29322	1.61196	0	0.958115	2.07302	1.89131	1.77708	2.23211	2.18986	2.83439	3.46129	3.11325	2.21515	1.53016	2.5121	2.64247	2.63864	3.24293	3.89701	2.98917	3.91238	3.81156	3.83874	3.00002	1.53999	1.25327	1.21678	2.39727	2.65966	3.11979
	110	1.17546	1.50239	1.21979	1.74246	1.70321	2.03319	1.62308	2.79378	1.77251	0.744661	0.662725	0.371596	1.99852	0.381563	2.45939	2.50751	0.972002	0.844277	0.550863	0.752466	0.958115	0	1.12137	0.951654	0.841783	1.27708	1.24825	1.90731	2.5473	2.18906	1.26565	0.710254	1.57451	1.72239	1.72081	2.32681	2.96169	2.04634	2.99256	2.87214	2.92135	2.0561	0.738513	0.477902	0.293198	1.68681	1.70872	2.16588
	115	2.07966	2.47867	2.21029	2.75967	2.65687	2.56393	2.53507	2.95773	2.24919	1.66781	0.952346	1.3346	1.52041	1.27082	2.68128	2.3399	1.96869	1.81688	0.933941	0.633458	2.07302	1.12137	0	0.25326	0.439574	0.281981	0.306091	0.917075	1.59468	1.21541	0.300263	0.731397	0.479537	0.698722	0.726409	1.31048	1.92213	0.942487	1.94531	1.8177	1.86109	0.942812	0.889801	0.928624	0.909694	1.38599	0.695783	1.09491
	120	1.85386	2.27711	1.98567	2.54251	2.41841	2.31456	2.30345	2.7427	2.00494	1.4735	0.707127	1.12762	1.39699	1.05529	2.47933	2.17983	1.78698	1.64107	0.78128	0.579273	1.89131	0.951654	0.25326	0	0.252169	0.42301	0.540503	1.17015	1.84301	1.46594	0.536422	0.517698	0.688472	0.92772	0.784563	1.39692	2.05244	1.1656	2.05747	1.95481	2.08947	1.15036	0.673159	0.717203	0.733992	1.29096	0.924646	1.27138
	125	1.66277	2.22192	1.8854	2.45249	2.29315	2.19949	2.22331	2.69011	1.95355	1.43054	0.608355	1.03985	1.48929	0.896107	2.29782	2.06206	1.73598	1.59895	0.825246	0.696167	1.77708	0.841783	0.439574	0.252169	0	0.493559	0.691871	1.32021	1.95301	1.58906	0.65829	0.572319	0.898796	1.13798	0.917064	1.50209	2.12657	1.34936	2.17213	2.04116	2.2826	1.33384	0.453407	0.696496	0.579134	1.20865	1.01428	1.36019
	130	2.1424	2.67936	2.36998	2.93141	2.78434	2.6267	2.70195	2.99466	2.37012	1.87362	1.07413	1.50658	1.56616	1.38276	2.59388	2.22022	2.17488	2.02821	1.17595	0.897548	2.23211	1.27708	0.281981	0.42301	0.493559	0	0.430784	0.889701	1.49272	1.13448	0.345225	0.94066	0.534442	0.776031	0.637398	1.16193	1.71995	0.901468	1.79949	1.62707	1.83494	0.892539	0.909212	1.12664	1.02614	1.31473	0.541038	0.889425
	135	2.2857	2.62768	2.39623	2.92953	2.86873	2.845	2.73683	3.24823	2.5211	1.81569	1.20423	1.50377	1.7813	1.4605	2.95771	2.61931	2.09063	1.93353	1.06325	0.690785	2.18986	1.24825	0.306091	0.540503	0.691871	0.430784	0	0.675229	1.36206	0.981511	0.117036	0.957303	0.453128	0.53374	0.90166	1.41832	1.95043	0.830637	2.00037	1.83886	1.69308	0.87068	1.13607	1.12437	1.06405	1.57728	0.557852	1.07806
	140	2.94236	3.27495	3.06652	3.59091	3.54142	3.47189	3.40335	3.77361	3.14301	2.46824	1.86218	2.17379	2.15289	2.12936	3.46789	3.02228	2.73115	2.57141	1.70539	1.31426	2.83439	1.90731	0.917075	1.17015	1.32021	0.889701	0.675229	0	0.72451	0.342625	0.675006	1.60463	0.635987	0.449152	1.1205	1.37901	1.68914	0.487826	1.78287	1.57104	1.1127	0.605125	1.76067	1.79038	1.72485	1.99153	0.463528	0.857322
	145	3.54143	3.96094	3.73951	4.26439	4.20263	4.11607	4.09453	4.38502	3.83021	3.15586	2.53014	2.84377	2.75187	2.76519	3.94585	3.46339	3.40445	3.2463	2.40734	2.01509	3.46129	2.5473	1.59468	1.84301	1.95301	1.49272	1.36206	0.72451	0	0.386312	1.33392	2.30815	1.31678	1.14308	1.66754	1.69933	1.67295	0.971511	1.88923	1.58312	1.01378	1.0723	2.36452	2.48334	2.35228	2.48186	0.955791	1.07533
	150	3.19722	3.59006	3.36923	3.89624	3.83534	3.75297	3.71708	4.04023	3.45205	2.78272	2.15652	2.47387	2.41641	2.40569	3.65294	3.18874	3.0393	2.88063	2.0285	1.63765	3.11325	2.18906	1.21541	1.46594	1.58906	1.13448	0.981511	0.342625	0.386312	0	0.95878	1.92429	0.942534	0.774653	1.34114	1.47793	1.6226	0.663425	1.78639	1.51678	1.02983	0.775055	2.01309	2.10374	1.99555	2.18348	0.61499	0.869331
	155	2.26935	2.67424	2.42168	2.96221	2.88135	2.83692	2.76758	3.2404	2.53707	1.86133	1.2068	1.52972	1.78647	1.45947	2.89579	2.55492	2.13852	1.98359	1.1222	0.7657	2.21515	1.26565	0.300263	0.536422	0.65829	0.345225	0.117036	0.675006	1.33392	0.95878	0	0.993196	0.475071	0.58624	0.866883	1.37097	1.88544	0.830234	1.95926	1.77902	1.70988	0.865788	1.09914	1.15766	1.06089	1.53122	0.479317	1.00644
	160	1.58008	1.79739	1.54049	2.08251	1.99718	1.98345	1.82821	2.49383	1.59258	1.00973	0.427932	0.730983	1.3481	0.786001	2.42588	2.23384	1.34205	1.20172	0.395418	0.504587	1.53016	0.710254	0.731397	0.517698	0.572319	0.94066	0.957303	1.60463	2.30815	1.92429	0.993196	0	1.09439	1.29422	1.16495	1.78089	2.49647	1.58848	2.43684	2.39686	2.46898	1.56951	0.688461	0.277027	0.627963	1.44178	1.4264	1.76445
	165	2.5421	2.85692	2.62619	3.16451	3.07829	2.91079	2.92169	3.16909	2.55431	2.05415	1.36564	1.7645	1.53207	1.73405	3.00635	2.54015	2.3569	2.20103	1.29097	0.955958	2.5121	1.57451	0.479537	0.688472	0.898796	0.534442	0.453128	0.635987	1.31678	0.942534	0.475071	1.09439	0	0.310755	0.599426	1.06345	1.64679	0.495927	1.62105	1.52474	1.40506	0.494907	1.33804	1.33067	1.38294	1.59949	0.578482	0.844546
	170	2.76171	2.99021	2.80248	3.32278	3.28163	3.17863	3.10419	3.44364	2.79723	2.19183	1.59951	1.93149	1.78882	1.93078	3.30859	2.84814	2.47358	2.31363	1.41736	1.04656	2.64247	1.72239	0.698722	0.92772	1.13798	0.776031	0.53374	0.449152	1.14308	0.774653	0.58624	1.29422	0.310755	0	0.884998	1.2568	1.75127	0.421145	1.72777	1.62107	1.20416	0.488337	1.5872	1.51126	1.55915	1.83767	0.632227	0.954494
	175	2.45256	2.94383	2.63521	3.19793	3.00923	2.61923	2.89219	2.74981	2.33323	2.17076	1.29901	1.84793	1.11725	1.75093	2.57834	2.00554	2.5043	2.36359	1.49353	1.27319	2.63864	1.72081	0.726409	0.784563	0.917064	0.637398	0.90166	1.1205	1.66754	1.34114	0.866883	1.16495	0.599426	0.884998	0	0.623092	1.34794	0.81711	1.28794	1.24825	1.68468	0.72287	1.2434	1.42068	1.48496	1.28523	0.866159	0.769431
	180	2.97597	3.54005	3.21478	3.78065	3.55313	3.02012	3.4511	2.9671	2.78585	2.78069	1.87697	2.45486	1.3534	2.33275	2.79533	2.06925	3.11726	2.97911	2.11323	1.88076	3.24293	2.32681	1.31048	1.39692	1.50209	1.16193	1.41832	1.37901	1.69933	1.47793	1.37097	1.78089	1.06345	1.2568	0.623092	0	0.786675	0.972371	0.683937	0.697021	1.57168	0.852906	1.79037	2.036	2.07678	1.53754	1.16531	0.701665
	185	3.59327	4.26694	3.92184	4.49745	4.25027	3.69002	4.1818	3.58301	3.52459	3.49185	2.56813	3.13844	2.09943	2.97866	3.24724	2.48576	3.8192	3.67819	2.80537	2.52927	3.89701	2.96169	1.92213	2.05244	2.12657	1.71995	1.95043	1.68914	1.67295	1.6226	1.88544	2.49647	1.64679	1.75127	1.34794	0.786675	0	1.36161	0.513219	0.14908	1.5951	1.28093	2.41301	2.73681	2.69295	2.01599	1.51633	0.927812
	190	3.00903	3.34469	3.12021	3.65866	3.57035	3.35208	3.41416	3.52042	3.00834	2.54251	1.84284	2.25429	1.81435	2.21086	3.34743	2.79693	2.8392	2.68158	1.77358	1.41865	2.98917	2.04634	0.942487	1.1656	1.34936	0.901468	0.830637	0.487826	0.971511	0.663425	0.830234	1.58848	0.495927	0.421145	0.81711	0.972371	1.36161	0	1.35585	1.22942	0.941976	0.129291	1.78442	1.82468	1.84639	1.86047	0.613293	0.646038
	195	3.63781	4.18741	3.87526	4.4383	4.20788	3.59589	4.09317	3.38534	3.37171	3.43454	2.54117	3.12247	1.83408	3.00549	3.30188	2.48706	3.7709	3.63116	2.75499	2.50233	3.91238	2.99256	1.94531	2.05747	2.17213	1.79949	2.00037	1.78287	1.88923	1.78639	1.95926	2.43684	1.62105	1.72777	1.28794	0.683937	0.513219	1.35585	0	0.459207	1.54093	1.25083	2.46754	2.6978	2.74445	2.03748	1.6706	1.11734
	200	3.537	4.17323	3.84083	4.41489	4.18279	3.64349	4.1008	3.54767	3.45692	3.39496	2.48397	3.04897	2.02506	2.90073	3.25571	2.50251	3.72164	3.5788	2.6987	2.4165	3.81156	2.87214	1.8177	1.95481	2.04116	1.62707	1.83886	1.57104	1.58312	1.51678	1.77902	2.39686	1.52474	1.62107	1.24825	0.697021	0.14908	1.22942	0.459207	0	1.47217	1.14681	2.34523	2.64073	2.60843	1.95705	1.41718	0.838398
	205	3.93664	4.15786	3.99229	4.50806	4.46596	4.24188	4.27097	4.29981	3.85965	3.37458	2.75583	3.13118	2.53491	3.12117	4.23759	3.60743	3.65181	3.49139	2.60361	2.23606	3.83874	2.92135	1.86109	2.08947	2.2826	1.83494	1.69308	1.1127	1.01378	1.02983	1.70988	2.46898	1.40506	1.20416	1.68468	1.57168	1.5951	0.941976	1.54093	1.47217	0	0.987348	2.72359	2.7031	2.74722	2.66463	1.4362	1.3198
	210	2.98768	3.33982	3.10552	3.64871	3.5453	3.28575	3.38969	3.42311	2.94701	2.54075	1.81113	2.25014	1.71123	2.20094	3.27345	2.70081	2.84542	2.6895	1.77821	1.43833	3.00002	2.0561	0.942812	1.15036	1.33384	0.892539	0.87068	0.605125	1.0723	0.775055	0.865788	1.56951	0.494907	0.488337	0.72287	0.852906	1.28093	0.129291	1.25083	1.14681	0.987348	0	1.75973	1.81458	1.84976	1.78928	0.659751	0.606891
	215	1.25058	2.0035	1.58937	2.16285	1.93098	1.83962	1.93065	2.45104	1.68077	1.28003	0.454267	0.856715	1.55699	0.606268	1.92498	1.83718	1.57374	1.46433	0.922412	0.97792	1.53999	0.738513	0.889801	0.673159	0.453407	0.909212	1.13607	1.76067	2.36452	2.01309	1.09914	0.688461	1.33804	1.5872	1.2434	1.79037	2.41301	1.78442	2.46754	2.34523	2.72359	1.75973	0	0.679422	0.491254	1.22708	1.42402	1.7158
	220	1.36489	1.56038	1.29672	1.83845	1.77325	1.89368	1.61562	2.5176	1.52356	0.761618	0.399107	0.456681	1.56131	0.563123	2.40146	2.31632	1.08779	0.949787	0.292515	0.575506	1.25327	0.477902	0.928624	0.717203	0.696496	1.12664	1.12437	1.79038	2.48334	2.10374	1.15766	0.277027	1.33067	1.51126	1.42068	2.036	2.73681	1.82468	2.6978	2.64073	2.7031	1.81458	0.679422	0	0.487438	1.54679	1.6082	1.98729
	225	1.24255	1.75664	1.42613	1.975	1.86777	2.04236	1.8164	2.73888	1.81707	0.991204	0.538474	0.574637	1.85354	0.421601	2.32124	2.3059	1.24783	1.12143	0.624981	0.710324	1.21678	0.293198	0.909694	0.733992	0.579134	1.02614	1.06405	1.72485	2.35228	1.99555	1.06089	0.627963	1.38294	1.55915	1.48496	2.07678	2.69295	1.84639	2.74445	2.60843	2.74722	1.84976	0.491254	0.487438	0	1.46916	1.47742	1.90958
	230	1.96736	2.73071	2.34258	2.90675	2.62073	2.0886	2.57594	2.22441	2.06251	2.0892	1.21112	1.76123	1.51231	1.54857	2.01054	1.62417	2.37845	2.27933	1.70214	1.65542	2.39727	1.68681	1.38599	1.29096	1.20865	1.31473	1.57728	1.99153	2.48186	2.18348	1.53122	1.44178	1.59949	1.83767	1.28523	1.53754	2.01599	1.86047	2.03748	1.95705	2.66463	1.78928	1.22708	1.54679	1.46916	0	1.6561	1.71103
	235	2.63437	3.14196	2.86434	3.41418	3.29803	3.16316	3.20964	3.48312	2.90311	2.3294	1.60003	1.97975	1.95381	1.8693	3.045	2.61546	2.60955	2.45633	1.59594	1.24235	2.65966	1.70872	0.695783	0.924646	1.01428	0.541038	0.557852	0.463528	0.955791	0.61499	0.479317	1.4264	0.578482	0.632227	0.866159	1.16531	1.51633	0.613293	1.6706	1.41718	1.4362	0.659751	1.42402	1.6082	1.47742	1.6561	0	0.613923
	240	2.95579	3.54748	3.23263	3.79803	3.61724	3.28982	3.54055	3.44203	3.0595	2.74453	1.89954	2.38709	1.84667	2.25166	3.02012	2.43708	3.0536	2.9051	2.02365	1.71032	3.11979	2.16588	1.09491	1.27138	1.36019	0.889425	1.07806	0.857322	1.07533	0.869331	1.00644	1.76445	0.844546	0.954494	0.769431	0.701665	0.927812	0.646038	1.11734	0.838398	1.3198	0.606891	1.7158	1.98729	1.90958	1.71103	0.613923	0
	245	4.31373	4.61562	4.43417	4.95086	4.90647	4.7335	4.74856	4.849	4.38774	3.81978	3.20188	3.54901	3.09653	3.51098	4.60071	3.99504	4.0812	3.9198	3.04865	2.66133	4.21306	3.29478	2.2608	2.50531	2.66512	2.19033	2.05638	1.39002	0.908676	1.15321	2.05317	2.93156	1.85378	1.6471	2.1445	1.99279	1.80865	1.38638	1.90329	1.72288	0.668059	1.4553	3.09619	3.14481	3.11141	3.093	1.69782	1.58382
	250	3.90141	4.31307	4.08528	4.62199	4.53297	4.31448	4.40568	4.44108	4.0121	3.50474	2.81074	3.19951	2.7307	3.12597	4.11163	3.51176	3.78105	3.62157	2.73562	2.35479	3.88302	2.94232	1.88005	2.11847	2.25684	1.76811	1.70358	1.0623	0.607242	0.807951	1.6793	2.5797	1.49642	1.347	1.72127	1.55682	1.37688	1.02607	1.53917	1.29108	0.668199	1.0835	2.67208	2.79574	2.73297	2.65001	1.27175	1.09345
	255	3.23187	3.70594	3.43137	3.98698	3.83721	3.49639	3.71799	3.57513	3.21026	2.90515	2.10372	2.5839	1.87836	2.49173	3.31412	2.67867	3.21675	3.06388	2.15776	1.82968	3.33599	2.38181	1.26507	1.45743	1.59808	1.12798	1.21722	0.861294	1.03384	0.863065	1.17862	1.91253	0.882002	0.910962	0.882585	0.704084	0.89159	0.503589	0.954295	0.769432	0.979207	0.452202	1.98539	2.15669	2.14735	1.92788	0.822592	0.393525
	260	2.56683	2.96185	2.69061	3.24168	3.09454	2.77086	2.95141	2.91809	2.43788	2.17919	1.38039	1.87925	1.22182	1.81968	2.79723	2.24042	2.50608	2.35895	1.46281	1.20393	2.66665	1.74118	0.68236	0.794055	0.975925	0.649434	0.799837	0.954599	1.53378	1.19708	0.78742	1.17235	0.412372	0.674809	0.246096	0.713544	1.40587	0.627331	1.32367	1.29168	1.49882	0.540555	1.35101	1.43541	1.52568	1.46987	0.791494	0.756106
	265	2.77835	3.30106	2.9898	3.55333	3.35406	2.9139	3.24451	2.96329	2.64814	2.52654	1.65005	2.20047	1.3042	2.09244	2.76503	2.11461	2.85864	2.71643	1.83712	1.58907	2.98593	2.05802	1.01309	1.11479	1.23775	0.877158	1.11925	1.13131	1.54606	1.27613	1.07526	1.51904	0.764675	0.980571	0.357636	0.310482	1.00929	0.749522	0.955775	0.906947	1.49766	0.635599	1.56214	1.7743	1.81382	1.47248	0.909174	0.565061
	270	3.06946	3.67791	3.34358	3.9131	3.68254	3.17226	3.59795	3.14709	2.95859	2.90671	1.99777	2.56464	1.5616	2.42698	2.87153	2.15523	3.23865	3.09851	2.22725	1.97394	3.34006	2.41093	1.37463	1.48295	1.57437	1.19443	1.45314	1.34184	1.57781	1.3922	1.39467	1.90476	1.12215	1.29267	0.745335	0.22389	0.617739	0.968031	0.649629	0.535927	1.52254	0.863045	1.86807	2.15215	2.1516	1.63847	1.11836	0.573969
	275	2.79326	3.49215	3.12141	3.6944	3.42512	2.8807	3.37393	2.88834	2.71691	2.73919	1.79244	2.37899	1.41588	2.21	2.5144	1.81309	3.07267	2.94101	2.11199	1.90365	3.14363	2.24093	1.30433	1.3604	1.40497	1.10157	1.44386	1.48162	1.78521	1.56605	1.37234	1.76328	1.17624	1.40923	0.679438	0.377964	0.848089	1.16392	0.92	0.809794	1.84602	1.06242	1.63044	1.99375	1.97108	1.4238	1.16264	0.71385
	280	2.92983	3.58678	3.23189	3.80313	3.54899	3.01003	3.48203	2.99107	2.82319	2.8271	1.89526	2.47627	1.4623	2.32234	2.67187	1.95462	3.16127	3.02609	2.17743	1.95111	3.24852	2.33468	1.35085	1.42859	1.49616	1.15916	1.46673	1.44015	1.71505	1.51083	1.4015	1.83701	1.16371	1.37242	0.70412	0.257423	0.727047	1.09067	0.772322	0.675392	1.71459	0.98523	1.75095	2.07712	2.06968	1.52651	1.16289	0.661208
	285	3.3099	3.89988	3.58328	4.15142	3.94956	3.50951	3.86203	3.52233	3.28425	3.10776	2.23358	2.7628	1.90831	2.63064	3.19131	2.50288	3.42854	3.28157	2.39064	2.09046	3.5199	2.57004	1.48683	1.64531	1.74614	1.30053	1.48817	1.20336	1.27951	1.16703	1.42941	2.10641	1.17605	1.26495	0.984183	0.574947	0.514125	0.875551	0.701206	0.412363	1.26405	0.804198	2.08165	2.34839	2.31314	1.89055	1.05468	0.46123
	290	3.31048	3.91624	3.59529	4.16536	3.95945	3.51514	3.87612	3.52748	3.29965	3.12392	2.24306	2.77513	1.93268	2.63691	3.18154	2.49399	3.44407	3.29754	2.40929	2.10918	3.52905	2.57931	1.50257	1.66015	1.7546	1.31	1.50338	1.22119	1.28395	1.17776	1.44185	2.12505	1.2028	1.29334	1.00527	0.592608	0.482018	0.906233	0.706908	0.383271	1.29324	0.83637	2.08643	2.3645	2.31979	1.87162	1.06142	0.468943
	295	3.2025	3.78249	3.47111	4.03815	3.84888	3.45369	3.76087	3.51525	3.22154	2.9845	2.12468	2.63751	1.89565	2.50761	3.16246	2.51033	3.3005	3.15204	2.26045	1.95038	3.3863	2.43288	1.34599	1.51592	1.61754	1.15826	1.33262	1.04489	1.15554	1.01657	1.27219	1.98906	1.0401	1.12439	0.902855	0.60725	0.664797	0.7447	0.849543	0.562513	1.22193	0.683507	1.96714	2.22584	2.17787	1.8302	0.886938	0.302779
	300	3.1453	3.65771	3.35662	3.91833	3.72159	3.24546	3.6049	3.21374	2.98088	2.88256	2.01664	2.56412	1.54175	2.45995	3.04583	2.33505	3.21326	3.06874	2.17825	1.90859	3.34865	2.41434	1.33855	1.46709	1.59657	1.19974	1.39168	1.23091	1.49437	1.29892	1.35126	1.87407	1.01122	1.14575	0.722101	0.272611	0.724985	0.802622	0.62974	0.60733	1.31203	0.689861	1.92913	2.13306	2.17122	1.73119	1.09114	0.59324
	305	2.6181	3.16201	2.85281	3.41729	3.24408	2.93509	3.15128	3.12591	2.67748	2.36309	1.51696	2.01425	1.53066	1.89491	2.78487	2.24157	2.67908	2.53184	1.64831	1.35783	2.76767	1.81692	0.737837	0.892831	1.00175	0.553965	0.793369	0.825372	1.28967	0.983948	0.728423	1.37254	0.540852	0.756886	0.416502	0.676753	1.19773	0.596321	1.2712	1.09838	1.47539	0.536174	1.37218	1.60349	1.5665	1.45904	0.520318	0.400086
	310	2.92385	3.76651	3.33944	3.89825	3.53392	2.78132	3.5406	2.62812	2.74616	3.09097	2.12534	2.73343	1.53826	2.52573	2.17095	1.34278	3.42459	3.31471	2.5873	2.46413	3.46455	2.6566	1.91556	1.89788	1.88429	1.71878	2.10944	2.22083	2.48811	2.2955	2.03405	2.20501	1.87318	2.13108	1.30573	0.995121	1.1965	1.90346	1.23869	1.23856	2.52439	1.79671	1.95471	2.4067	2.38865	1.61005	1.87039	1.43142
	315	2.89465	3.71817	3.29333	3.84701	3.47816	2.69602	3.47938	2.50996	2.65823	3.05729	2.10008	2.7105	1.44782	2.51034	2.11656	1.2651	3.39226	3.28537	2.57172	2.46547	3.4438	2.65221	1.93679	1.90545	1.89488	1.75479	2.14367	2.28098	2.57739	2.37204	2.07305	2.18463	1.90089	2.16541	1.31925	1.03257	1.29104	1.95164	1.28507	1.32548	2.58163	1.84127	1.95135	2.38634	2.39093	1.60124	1.93577	1.512
	320	3.49496	4.2639	3.86912	4.43372	4.10014	3.33721	4.06858	3.06627	3.25876	3.55956	2.59539	3.21288	1.8681	3.02808	2.76983	1.90769	3.8988	3.77789	2.98436	2.80544	3.97178	3.11349	2.22736	2.26634	2.29899	2.03159	2.36395	2.31077	2.44865	2.32639	2.29571	2.6161	2.06014	2.25932	1.55181	1.01471	0.855764	1.94169	0.857457	0.934847	2.33742	1.83211	2.45584	2.84583	2.84381	1.96383	2.04178	1.4904
	325	2.7766	3.46582	3.08355	3.64257	3.33429	2.65642	3.28331	2.54179	2.50671	2.76608	1.82469	2.43297	1.14552	2.27394	2.29947	1.51057	3.10783	2.98887	2.21467	2.07837	3.20461	2.36416	1.54633	1.53682	1.57514	1.39029	1.7453	1.87474	2.23352	1.99735	1.68725	1.83312	1.4582	1.71872	0.876383	0.619529	1.12875	1.51645	1.04456	1.11211	2.17877	1.40196	1.71487	2.06246	2.11053	1.4697	1.5693	1.16483
	330	2.89874	3.56882	3.20287	3.77082	3.4931	2.88501	3.43003	2.80856	2.71389	2.83262	1.88953	2.48943	1.32767	2.33309	2.5362	1.77736	3.17175	3.04286	2.21986	2.02946	3.266	2.37893	1.45445	1.49609	1.55388	1.27776	1.60665	1.64211	1.94759	1.73358	1.5451	1.85941	1.30157	1.53244	0.770971	0.350063	0.843219	1.27807	0.809099	0.811426	1.90176	1.16517	1.76427	2.09859	2.11718	1.4919	1.35651	0.890051
	335	2.66609	3.32244	2.96629	3.53899	3.29484	2.81631	3.23085	2.88712	2.62182	2.55632	1.62574	2.19781	1.36265	2.04127	2.53035	1.88263	2.88749	2.75199	1.90844	1.68675	2.96525	2.04875	1.08294	1.15054	1.20911	0.884839	1.2207	1.29103	1.65718	1.40536	1.15117	1.57049	0.959064	1.20194	0.47999	0.392083	0.972137	0.990154	1.03093	0.907482	1.74926	0.893165	1.47037	1.80347	1.78243	1.35529	0.966596	0.593302
	340	3.0047	3.82874	3.40799	3.96689	3.60728	2.84647	3.60545	2.66465	2.80126	3.15057	2.18569	2.79716	1.55239	2.59562	2.25262	1.41128	3.48604	3.37468	2.63686	2.50726	3.53518	2.72056	1.95559	1.94502	1.94123	1.7615	2.14362	2.23387	2.48961	2.30373	2.07034	2.25471	1.89178	2.14309	1.32556	0.974368	1.1474	1.90252	1.17136	1.19221	2.49472	1.7935	2.02559	2.46246	2.45339	1.65391	1.89649	1.43757
	345	2.84319	3.59196	3.19471	3.75785	3.43602	2.75406	3.40572	2.64632	2.64085	2.88808	1.93149	2.5393	1.32872	2.35981	2.3001	1.50633	3.22671	3.10805	2.33614	2.18955	3.29856	2.45364	1.63387	1.63419	1.65465	1.45137	1.82026	1.9197	2.22747	2.01406	1.75268	1.95785	1.55163	1.80569	0.984912	0.672065	1.04472	1.5802	1.03375	1.05028	2.22176	1.47024	1.78593	2.17922	2.18987	1.50948	1.59546	1.15768
	350	2.73482	3.41554	3.039	3.60279	3.30938	2.6764	3.2537	2.60686	2.51332	2.69871	1.75413	2.35943	1.1613	2.20111	2.34174	1.58504	3.0395	2.91646	2.12369	1.96956	3.13384	2.27393	1.42228	1.42631	1.46993	1.2597	1.612	1.7334	2.09701	1.85643	1.55236	1.74859	1.3271	1.58615	0.751072	0.508824	1.06689	1.38281	1.00825	1.03824	2.06704	1.27016	1.63651	1.981	2.01685	1.41257	1.42571	1.02792
	355	2.80417	3.62123	3.21171	3.78443	3.46673	2.85711	3.45985	2.84542	2.77226	2.8934	1.92321	2.51635	1.56042	2.30972	2.32418	1.60166	3.22331	3.10095	2.32083	2.14451	3.25374	2.38639	1.55245	1.577	1.57219	1.32828	1.71051	1.77914	2.03219	1.83906	1.62738	1.96068	1.49373	1.73688	0.982721	0.70239	0.941322	1.50066	1.08927	0.957384	2.16185	1.40576	1.71703	2.16822	2.10729	1.46213	1.41818	0.98125
	360	3.25197	3.96131	3.59221	4.16385	3.88514	3.28254	3.83522	3.18467	3.1339	3.2094	2.26542	2.85323	1.73664	2.68435	2.82258	2.05009	3.54393	3.41089	2.56894	2.34117	3.61821	2.71038	1.73401	1.81604	1.87105	1.52868	1.83234	1.72451	1.86723	1.73328	1.76272	2.22537	1.52847	1.70781	1.09541	0.546527	0.483317	1.37647	0.621548	0.510117	1.83392	1.27724	2.10187	2.46233	2.43944	1.78815	1.46839	0.893826
	365	2.76571	3.59409	3.16892	3.72731	3.36898	2.64085	3.37254	2.53302	2.58984	2.9182	1.95719	2.56199	1.40274	2.35838	2.07793	1.2723	3.25195	3.14235	2.42025	2.30653	3.29515	2.49027	1.76922	1.74013	1.72462	1.58014	1.97572	2.12595	2.43576	2.22136	1.90206	2.03616	1.74897	2.01792	1.17508	0.939376	1.2523	1.81693	1.28032	1.27673	2.48718	1.71128	1.78812	2.23592	2.22529	1.51181	1.76823	1.36691
	370	2.73079	3.51718	3.10425	3.66378	3.321	2.6114	3.30774	2.51036	2.52849	2.83322	1.87554	2.48304	1.29411	2.29231	2.12112	1.32394	3.16976	3.05735	2.32024	2.20184	3.22901	2.41279	1.66698	1.64059	1.63928	1.48768	1.87473	2.0285	2.36137	2.13595	1.80546	1.93563	1.634	1.90366	1.05434	0.830659	1.21741	1.70794	1.21388	1.22725	2.38749	1.60002	1.7237	2.14377	2.15083	1.46429	1.68223	1.28739
	375	2.83896	3.61769	3.21863	3.78991	3.48066	2.86504	3.45948	2.83004	2.75735	2.88838	1.92366	2.52042	1.49216	2.3274	2.37672	1.636	3.22172	3.09782	2.30597	2.12733	3.27015	2.39769	1.53779	1.56566	1.57788	1.32538	1.69649	1.7552	2.02034	1.82268	1.61888	1.94302	1.45308	1.69446	0.930808	0.611437	0.901372	1.45118	1.00431	0.908929	2.09993	1.3511	1.73832	2.15995	2.12292	1.4833	1.41348	0.959035
	380	3.02415	3.73611	3.3646	3.93721	3.66281	3.09488	3.61575	3.05723	2.94183	2.98176	2.03677	2.62084	1.59591	2.44941	2.667	1.93186	3.31479	3.18213	2.34591	2.12408	3.38285	2.47585	1.51555	1.58917	1.63701	1.30605	1.62874	1.58038	1.79203	1.61933	1.55617	2.00165	1.34499	1.54781	0.891245	0.430253	0.64178	1.25101	0.767575	0.631134	1.82346	1.15191	1.86571	2.23403	2.20407	1.61275	1.28953	0.755522
	385	2.42892	3.19198	2.79414	3.36666	3.07578	2.55677	3.05417	2.66696	2.4232	2.45498	1.49633	2.07937	1.30509	1.88652	2.17979	1.55628	2.78482	2.66081	1.88204	1.72101	2.82593	1.95324	1.1497	1.14713	1.14045	0.942987	1.34578	1.5436	1.93353	1.6724	1.26687	1.52086	1.16631	1.44448	0.648712	0.699405	1.22123	1.30172	1.30353	1.18876	2.10481	1.21404	1.29392	1.72601	1.67951	1.25092	1.15967	0.887721
	390	2.97465	3.48451	3.18424	3.74532	3.55942	3.14156	3.44757	3.18574	2.86942	2.70062	1.84631	2.37569	1.50494	2.27251	2.96493	2.30527	3.02759	2.88155	1.98867	1.71128	3.15356	2.21374	1.12904	1.26636	1.39723	0.986401	1.18126	1.05675	1.38789	1.15371	1.13771	1.69181	0.812577	0.967522	0.558699	0.34979	0.881123	0.65405	0.855995	0.769102	1.3138	0.545768	1.7433	1.94611	1.97095	1.65912	0.88852	0.443153
	395	2.45186	3.13226	2.75798	3.32784	3.05995	2.55022	3.00821	2.63915	2.36753	2.38905	1.44526	2.03151	1.16687	1.86838	2.27722	1.64282	2.7243	2.59652	1.79218	1.62433	2.80008	1.91671	1.06039	1.06428	1.09733	0.884367	1.26084	1.45974	1.89133	1.61311	1.19449	1.42793	1.03439	1.31629	0.480325	0.584611	1.21705	1.17993	1.23303	1.165	1.98871	1.08446	1.29203	1.65255	1.65369	1.26053	1.112	0.846943
	400	2.6834	3.35581	3.00053	3.57363	3.34032	2.91738	3.28601	3.04103	2.72754	2.57675	1.66042	2.20696	1.52654	2.04345	2.60454	1.99656	2.90034	2.76189	1.91293	1.66687	2.95847	2.02893	1.04198	1.13771	1.18827	0.816213	1.14608	1.17231	1.50425	1.26196	1.06648	1.59512	0.918851	1.1423	0.549722	0.513473	0.967776	0.921814	1.10237	0.904392	1.68859	0.84286	1.46921	1.8185	1.75807	1.42405	0.826362	0.443114
	405	1.41532	2.24326	1.79233	2.35624	2.02859	1.63292	2.05056	2.09539	1.52849	1.59434	0.709749	1.22434	1.24537	1.00129	1.567	1.35298	1.90605	1.81388	1.29125	1.35909	1.90723	1.21715	1.13918	0.929499	0.782473	1.09991	1.43047	1.98163	2.55931	2.21906	1.38383	0.955026	1.48186	1.77695	1.17141	1.61978	2.2598	1.88545	2.2778	2.2102	2.81487	1.82876	0.525524	1.02443	1.00253	1.16055	1.61202	1.71936
	410	2.35546	3.13289	2.7348	3.30992	3.0296	2.56678	3.01409	2.73752	2.43605	2.38445	1.4297	1.99732	1.39406	1.79544	2.19482	1.628	2.7084	2.58231	1.80218	1.62826	2.73239	1.84807	1.0466	1.05302	1.03099	0.820169	1.23309	1.44708	1.84169	1.57516	1.14674	1.45556	1.09765	1.37297	0.639238	0.774306	1.27006	1.25105	1.39055	1.23243	2.08264	1.17511	1.1985	1.65074	1.56845	1.21595	1.04009	0.830769
	415	2.59613	3.21345	2.86684	3.43567	3.20326	2.75005	3.12951	2.84496	2.5295	2.44648	1.53191	2.09555	1.27723	1.95387	2.52095	1.89396	2.77891	2.64254	1.79452	1.57714	2.86988	1.95396	0.982309	1.04431	1.11822	0.803538	1.13462	1.24382	1.66101	1.38693	1.07158	1.45463	0.860813	1.11832	0.363214	0.438844	1.0876	0.940662	1.10813	1.01484	1.73842	0.844478	1.38976	1.69284	1.69462	1.36756	0.930039	0.620877
	420	2.61768	3.44331	3.02649	3.59637	3.27195	2.67053	3.27244	2.7007	2.58821	2.72607	1.75862	2.34878	1.44133	2.13938	2.15599	1.46003	3.05543	2.93675	2.17947	2.0279	3.08192	2.23204	1.45571	1.45307	1.43387	1.24001	1.64132	1.78311	2.09512	1.87331	1.55887	1.8125	1.44765	1.71249	0.918176	0.769667	1.13137	1.52126	1.24441	1.13468	2.24746	1.42819	1.54625	2.01167	1.95573	1.37941	1.40298	1.03596
	425	1.98924	2.93439	2.46017	3.00131	2.59387	1.90601	2.66245	2.06139	1.94289	2.33443	1.43461	1.97746	1.32087	1.73904	1.34412	0.781323	2.64508	2.56029	2.01109	2.01809	2.63002	1.96176	1.62911	1.49207	1.38429	1.48989	1.90062	2.28885	2.74102	2.45727	1.83065	1.64233	1.82661	2.13386	1.32358	1.4801	1.97969	2.09354	2.02002	1.97514	2.94261	2.00918	1.23576	1.76079	1.72428	1.30469	1.88008	1.73779
	430	2.63206	3.39548	3.00636	3.58156	3.30393	2.80693	3.28038	2.90231	2.67311	2.64007	1.68841	2.25895	1.50517	2.06542	2.3873	1.75235	2.96602	2.83632	2.02884	1.82504	3.00026	2.1017	1.21645	1.26369	1.27076	0.982863	1.36128	1.44813	1.75653	1.53019	1.27578	1.68693	1.16612	1.41121	0.70824	0.605371	0.99963	1.20657	1.15395	0.972279	1.95234	1.12294	1.47173	1.89666	1.82248	1.36551	1.07205	0.701586
	435	2.80279	3.4407	3.10054	3.6719	3.45528	3.0496	3.38882	3.16259	2.84228	2.65346	1.756	2.29055	1.60602	2.13943	2.75561	2.14022	2.97495	2.83279	1.96662	1.69755	3.04281	2.1026	1.07141	1.1956	1.26639	0.854904	1.13912	1.08283	1.38106	1.15202	1.06416	1.66365	0.886243	1.07772	0.59072	0.487737	0.887349	0.814797	1.02975	0.811121	1.54517	0.737579	1.57696	1.89251	1.83663	1.5157	0.774908	0.308988
	440	2.59638	3.24593	2.90405	3.47496	3.26988	2.93799	3.2129	3.14195	2.73415	2.45231	1.56995	2.07784	1.63155	1.91893	2.67258	2.13585	2.76536	2.62277	1.76803	1.49448	2.81193	1.86853	0.86122	0.990426	1.04155	0.617445	0.928597	0.96425	1.33492	1.06644	0.840629	1.48272	0.764044	0.973673	0.561026	0.712425	1.13242	0.800673	1.29084	1.05726	1.62815	0.74988	1.36337	1.69418	1.5997	1.42675	0.580542	0.372556
	445	2.28836	3.01215	2.63598	3.21085	2.96892	2.60547	2.9377	2.84816	2.438	2.24022	1.31421	1.85096	1.455	1.66297	2.32411	1.8261	2.55805	2.425	1.6192	1.41244	2.58437	1.67043	0.811546	0.848695	0.838877	0.567335	0.980177	1.22098	1.65961	1.36909	0.889536	1.29894	0.887282	1.15733	0.546832	0.838183	1.35349	1.07924	1.47985	1.29523	1.95626	1.02074	1.07808	1.49324	1.39121	1.22069	0.80243	0.725357
	450	2.93052	3.52704	3.20812	3.77474	3.58714	3.24121	3.51063	3.38111	3.01271	2.72697	1.8709	2.36961	1.78655	2.2328	2.97041	2.37716	3.03951	2.89208	2.01114	1.70647	3.10902	2.15679	1.08723	1.25393	1.34233	0.88087	1.0892	0.902956	1.14313	0.931185	1.01785	1.74158	0.841846	0.970638	0.719806	0.637721	0.903245	0.665811	1.0782	0.814125	1.35377	0.614369	1.69102	1.96772	1.89883	1.67332	0.648598	0.0699122
	455	3.09981	3.71504	3.39734	3.96313	3.78039	3.45433	3.71225	3.60105	3.23819	2.91009	2.06771	2.54767	2.01974	2.40413	3.13537	2.54798	3.21453	3.06565	2.18833	1.86614	3.26719	2.3138	1.2555	1.43884	1.51756	1.04338	1.2137	0.914669	0.995335	0.854131	1.13952	1.93874	1.00453	1.07919	0.953386	0.812328	0.864888	0.747793	1.12364	0.787765	1.29689	0.724814	1.86727	2.15552	2.05558	1.8329	0.704721	0.186986
	460	3.4161	3.94883	3.656	4.21723	4.04446	3.65704	3.94196	3.69459	3.40103	3.14925	2.31709	2.81579	2.02903	2.7036	3.38482	2.71487	3.46334	3.31219	2.41071	2.08802	3.56628	2.61106	1.50522	1.68865	1.80914	1.34027	1.46476	1.08497	1.10303	1.01787	1.41582	2.15233	1.14811	1.18144	1.07383	0.743938	0.675673	0.771131	0.822636	0.569559	1.05129	0.72362	2.17379	2.39474	2.36542	2.04618	1.02166	0.490939
	465	2.51703	3.12185	2.77313	3.33947	3.09984	2.62277	3.0223	2.70699	2.39539	2.36722	1.45001	2.02433	1.13409	1.8886	2.42749	1.79636	2.70381	2.57073	1.7366	1.54705	2.80599	1.90684	0.981107	1.00999	1.08387	0.828528	1.16668	1.33731	1.79162	1.50415	1.11076	1.38137	0.892799	1.16843	0.333051	0.494352	1.19469	1.02758	1.17034	1.12425	1.83611	0.927874	1.32988	1.62213	1.65339	1.32596	1.02904	0.766841
	470	3.52219	4.16773	3.83078	4.40266	4.16805	3.64381	4.09507	3.57431	3.45461	3.38756	2.48036	3.03714	2.02901	2.88791	3.23277	2.4881	3.71435	3.57148	2.69145	2.40998	3.79849	2.8583	1.80093	1.93817	2.0223	1.60317	1.82505	1.55294	1.5566	1.49295	1.76206	2.38591	1.51037	1.61189	1.2349	0.694489	0.201828	1.22005	0.528377	0.185896	1.484	1.14204	2.321	2.62883	2.59331	2.0243	1.38991	0.785461
	475	2.54498	3.38912	2.94642	3.48283	3.08382	2.26074	3.10684	2.1169	2.25973	2.7829	1.86283	2.45178	1.2614	2.24957	1.70106	0.855124	3.11046	3.0184	2.39317	2.35784	3.15399	2.44241	1.90612	1.81482	1.77334	1.75728	2.1584	2.42476	2.81572	2.565	2.09346	2.00208	1.96569	2.25949	1.38076	1.2961	1.7126	2.12672	1.67913	1.72751	2.85734	2.02021	1.73232	2.17358	2.20087	1.50699	2.05633	1.74545
	480	2.86008	3.64182	3.23668	3.80327	3.47352	2.78109	3.45186	2.66765	2.6925	2.93803	1.96998	2.58216	1.41112	2.39029	2.2855	1.48887	3.27461	3.15674	2.38976	2.24046	3.33347	2.4893	1.67917	1.68147	1.69053	1.48596	1.86019	1.95397	2.24108	2.03695	1.78841	2.01439	1.60687	1.85823	1.04534	0.71785	1.01675	1.62585	1.04316	1.03185	2.26005	1.51725	1.81559	2.23028	2.22066	1.4716	1.61873	1.17791
	485	3.22949	3.82594	3.49654	4.06519	3.83314	3.29031	3.74104	3.21011	3.07608	3.059	2.15133	2.72439	1.62996	2.5912	2.98365	2.23393	3.39254	3.25239	2.37843	2.12403	3.50415	2.57668	1.53508	1.64558	1.74337	1.36407	1.60475	1.45355	1.64307	1.48517	1.55108	2.05652	1.25726	1.40681	0.892771	0.298496	0.497349	1.0586	0.468196	0.41095	1.50521	0.951748	2.03717	2.30825	2.31973	1.73586	1.26497	0.706173
	490	3.82871	4.54969	4.17744	4.74558	4.43498	3.67558	4.37753	3.35084	3.57431	3.83134	2.87537	3.4937	2.121	3.32214	3.15531	2.28796	4.17035	4.0436	3.22094	3.01228	4.26182	3.38074	2.43569	2.50401	2.55913	2.24856	2.53492	2.39378	2.45424	2.3764	2.47344	2.86963	2.20948	2.36563	1.76084	1.16578	0.788436	2.01098	0.745237	0.872875	2.24544	1.90485	2.76129	3.10993	3.1134	2.16543	2.18357	1.61363
	495	3.81605	4.30154	4.03378	4.59182	4.44132	4.05347	4.31781	4.04017	3.78408	3.50019	2.69588	3.18253	2.3693	3.08429	3.79707	3.10154	3.8075	3.65296	2.74524	2.40188	3.92546	2.96893	1.85821	2.05938	2.19301	1.71636	1.77253	1.27971	1.10424	1.1405	1.7366	2.5144	1.46336	1.42066	1.46364	1.09743	0.795263	1.00597	0.909861	0.700601	0.849557	0.98268	2.57821	2.758	2.73326	2.34843	1.33406	0.90049
	500	3.84202	4.26661	4.02187	4.5714	4.44651	4.09967	4.30646	4.10648	3.80082	3.46563	2.70143	3.16322	2.39799	3.08564	3.90266	3.22233	3.76718	3.61045	2.70139	2.34851	3.90109	2.94825	1.83573	2.04766	2.19782	1.71917	1.72759	1.1947	1.01674	1.05687	1.70317	2.49115	1.4158	1.33425	1.48983	1.18692	0.987034	0.933861	1.04495	0.882807	0.646299	0.927892	2.60102	2.73463	2.72546	2.42352	1.31875	0.957086
	505	4.02547	4.57793	4.2821	4.84854	4.65435	4.15283	4.54489	4.03233	3.92243	3.7887	2.92808	3.46235	2.43587	3.34282	3.80599	3.04299	4.10885	3.9592	3.0565	2.74025	4.22354	3.27118	2.17139	2.34361	2.4606	2.00859	2.13303	1.71094	1.54627	1.58699	2.08854	2.78741	1.80126	1.81025	1.65994	1.14555	0.585277	1.39061	0.691883	0.5535	1.24658	1.33698	2.80703	3.03823	3.02149	2.446	1.69326	1.16396
	510	3.89367	4.50178	4.18863	4.75962	4.55449	4.07143	4.46651	3.9983	3.86711	3.70735	2.83185	3.36357	2.43133	3.22513	3.67252	2.93701	4.0245	3.87577	2.98042	2.66248	4.11135	3.15802	2.07348	2.24595	2.34355	1.88789	2.03468	1.62386	1.43907	1.48319	1.97916	2.7104	1.73655	1.76031	1.58906	1.09493	0.466866	1.34355	0.75408	0.454707	1.31365	1.29523	2.67931	2.95162	2.89997	2.341	1.56122	1.02261
	515	4.65029	5.11886	4.86808	5.42204	5.28415	4.88375	5.1532	4.80551	4.61366	4.31689	3.53551	4.00822	3.14659	3.91497	4.57296	3.84153	4.61602	4.45896	3.55234	3.19364	4.7368	3.78204	2.67837	2.89067	3.02563	2.5421	2.55863	1.98052	1.56277	1.76318	2.52849	3.34305	2.27024	2.17381	2.30534	1.88925	1.37066	1.78528	1.47761	1.34198	1.1971	1.78345	3.41486	3.58481	3.55217	3.12149	2.11068	1.7185
	520	4.27625	4.89795	4.57961	5.15255	4.92829	4.36306	4.83762	4.18293	4.17767	4.11489	3.22062	3.77653	2.68634	3.63432	3.92101	3.13141	4.43786	4.29146	3.39885	3.09289	4.53421	3.5871	2.51036	2.66996	2.76629	2.32851	2.48552	2.0826	1.86873	1.94074	2.43272	3.11587	2.16955	2.19578	1.97264	1.41274	0.704028	1.77841	0.865602	0.748015	1.61939	1.72075	3.08472	3.36287	3.32703	2.62331	2.02844	1.48281
	523	4.67165	5.24908	4.95733	5.52522	5.33951	4.85877	5.23877	4.73231	4.64666	4.44923	3.60269	4.116	3.17046	3.98762	4.43381	3.67877	4.75819	4.60547	3.70337	3.36184	4.85127	3.89459	2.80279	2.99562	3.1031	2.63187	2.71827	2.19986	1.80782	1.98756	2.67203	3.46068	2.43303	2.38969	2.36331	1.87142	1.20402	1.97981	1.38474	1.22265	1.57036	1.95696	3.45665	3.70161	3.64456	3.06413	2.23675	1.77018
	Node statistics:
	Node	Level	Weight	Objects	Left son	Right son
	209	111.864	105	105	207	208
	208	18.1561	75	75	202	206
	207	15.9597	30	30	203	205
	206	15.7064	56	56	200	204
	205	11.449	23	23	197	201
	204	5.29406	40	40	194	195
	203	4.98569	7	7	189	192
	202	3.61201	19	19	193	199
	201	2.74566	13	13	186	196
	200	2.37087	16	16	181	198
	199	1.71291	5	5	159	177
	198	1.56681	12	12	178	183
	197	1.5453	10	10	176	190
	196	1.36937	5	5	13	191
	195	1.34079	19	19	152	188
	194	1.31562	21	21	170	187
	193	1.30768	14	14	184	185
	192	1.24745	4	4	15	182
	191	0.997666	4	4	46	173
	190	0.983511	6	6	1	179
	189	0.904302	3	3	8	174
	188	0.885892	17	17	160	180
	187	0.817634	13	13	163	175
	186	0.698145	8	8	164	166
	185	0.556839	7	7	161	169
	184	0.541057	7	7	125	151
	183	0.50213	6	6	130	172
	182	0.387219	3	3	16	168
	181	0.337717	4	4	29	167
	180	0.324026	10	10	158	171
	179	0.304886	5	5	157	165
	178	0.29229	6	6	134	154
	177	0.253663	3	3	41	162
	176	0.253243	4	4	21	146
	175	0.24153	7	7	129	150
	174	0.231739	2	2	6	9
	173	0.22558	3	3	81	156
	172	0.198357	4	4	112	144
	171	0.192078	5	5	114	135
	170	0.183917	8	8	142	153
	169	0.180236	4	4	39	126
	168	0.180047	2	2	85	95
	167	0.178125	3	3	47	147
	166	0.159917	4	4	20	149
	165	0.154538	3	3	5	155
	164	0.144558	4	4	140	148
	163	0.136673	6	6	139	145
	162	0.131804	2	2	49	50
	161	0.122606	3	3	104	131
	160	0.113505	7	7	121	143
	159	0.112993	2	2	103	105
	158	0.112694	5	5	128	133
	157	0.108912	2	2	2	4
	156	0.103179	2	2	11	43
	155	0.100509	2	2	3	7
	154	0.0988486	4	4	110	138
	153	0.0938056	4	4	89	141
	152	0.0936978	2	2	64	98
	151	0.09226	5	5	124	136
	150	0.0830392	4	4	117	132
	149	0.0678494	3	3	19	137
	148	0.0637168	2	2	12	14
	147	0.058696	2	2	28	30
	146	0.0561254	3	3	10	118
	145	0.0550316	3	3	53	127
	144	0.0482843	2	2	33	34
	143	0.0471372	4	4	111	113
	142	0.0462542	4	4	115	122
	141	0.0438338	3	3	86	120
	140	0.0429824	2	2	22	45
	139	0.0408418	3	3	36	123
	138	0.0397566	2	2	23	26
	137	0.0383719	2	2	32	44
	136	0.0377155	2	2	51	92
	135	0.0329708	3	3	84	109
	134	0.0317946	2	2	24	25
	133	0.0316521	3	3	66	119
	132	0.0307543	2	2	61	88
	131	0.0304512	2	2	101	102
	130	0.0302815	2	2	35	52
	129	0.0294586	3	3	91	107
	128	0.028193	2	2	72	76
	127	0.0261887	2	2	60	78
	126	0.0213932	3	3	94	116
	125	0.0212948	2	2	99	100
	124	0.0201859	3	3	59	106
	123	0.0167009	2	2	54	97
	122	0.0164705	2	2	79	93
	121	0.0139649	3	3	63	108
	120	0.0136115	2	2	77	82
	119	0.0134763	2	2	55	56
	118	0.0130767	2	2	17	18
	117	0.0115216	2	2	80	87
	116	0.0111124	2	2	37	40
	115	0.0106388	2	2	67	83
	114	0.0104765	2	2	65	70
	113	0.00908116	2	2	73	74
	112	0.00835807	2	2	38	42
	111	0.00834695	2	2	69	96
	110	0.0068487	2	2	27	31
	109	0.00650444	2	2	71	75
	108	0.00453635	2	2	62	68
	107	0.00244386	2	2	48	90
	106	0.00182367	2	2	57	58
	Cophenetic distance matrix:
		5	10	15	20	25	30	35	40	45	50	55	60	65	70	75	80	85	90	95	100	105	110	115	120	125	130	135	140	145	150	155	160	165	170	175	180	185	190	195	200	205	210	215	220	225	230	235	240
	5	0	0.983511	0.983511	0.983511	0.983511	15.9597	0.983511	15.9597	15.9597	1.5453	11.449	11.449	11.449	11.449	15.9597	15.9597	1.5453	1.5453	11.449	11.449	1.5453	11.449	111.864	111.864	111.864	111.864	111.864	111.864	111.864	111.864	111.864	11.449	111.864	111.864	111.864	111.864	111.864	111.864	111.864	111.864	111.864	111.864	11.449	11.449	11.449	11.449	111.864	111.864
	10	0.983511	0	0.304886	0.108912	0.304886	15.9597	0.304886	15.9597	15.9597	1.5453	11.449	11.449	11.449	11.449	15.9597	15.9597	1.5453	1.5453	11.449	11.449	1.5453	11.449	111.864	111.864	111.864	111.864	111.864	111.864	111.864	111.864	111.864	11.449	111.864	111.864	111.864	111.864	111.864	111.864	111.864	111.864	111.864	111.864	11.449	11.449	11.449	11.449	111.864	111.864
	15	0.983511	0.304886	0	0.304886	0.154538	15.9597	0.100509	15.9597	15.9597	1.5453	11.449	11.449	11.449	11.449	15.9597	15.9597	1.5453	1.5453	11.449	11.449	1.5453	11.449	111.864	111.864	111.864	111.864	111.864	111.864	111.864	111.864	111.864	11.449	111.864	111.864	111.864	111.864	111.864	111.864	111.864	111.864	111.864	111.864	11.449	11.449	11.449	11.449	111.864	111.864
	20	0.983511	0.108912	0.304886	0	0.304886	15.9597	0.304886	15.9597	15.9597	1.5453	11.449	11.449	11.449	11.449	15.9597	15.9597	1.5453	1.5453	11.449	11.449	1.5453	11.449	111.864	111.864	111.864	111.864	111.864	111.864	111.864	111.864	111.864	11.449	111.864	111.864	111.864	111.864	111.864	111.864	111.864	111.864	111.864	111.864	11.449	11.449	11.449	11.449	111.864	111.864
	25	0.983511	0.304886	0.154538	0.304886	0	15.9597	0.154538	15.9597	15.9597	1.5453	11.449	11.449	11.449	11.449	15.9597	15.9597	1.5453	1.5453	11.449	11.449	1.5453	11.449	111.864	111.864	111.864	111.864	111.864	111.864	111.864	111.864	111.864	11.449	111.864	111.864	111.864	111.864	111.864	111.864	111.864	111.864	111.864	111.864	11.449	11.449	11.449	11.449	111.864	111.864
	30	15.9597	15.9597	15.9597	15.9597	15.9597	0	15.9597	0.904302	0.231739	15.9597	15.9597	15.9597	15.9597	15.9597	4.98569	4.98569	15.9597	15.9597	15.9597	15.9597	15.9597	15.9597	111.864	111.864	111.864	111.864	111.864	111.864	111.864	111.864	111.864	15.9597	111.864	111.864	111.864	111.864	111.864	111.864	111.864	111.864	111.864	111.864	15.9597	15.9597	15.9597	15.9597	111.864	111.864
	35	0.983511	0.304886	0.100509	0.304886	0.154538	15.9597	0	15.9597	15.9597	1.5453	11.449	11.449	11.449	11.449	15.9597	15.9597	1.5453	1.5453	11.449	11.449	1.5453	11.449	111.864	111.864	111.864	111.864	111.864	111.864	111.864	111.864	111.864	11.449	111.864	111.864	111.864	111.864	111.864	111.864	111.864	111.864	111.864	111.864	11.449	11.449	11.449	11.449	111.864	111.864
	40	15.9597	15.9597	15.9597	15.9597	15.9597	0.904302	15.9597	0	0.904302	15.9597	15.9597	15.9597	15.9597	15.9597	4.98569	4.98569	15.9597	15.9597	15.9597	15.9597	15.9597	15.9597	111.864	111.864	111.864	111.864	111.864	111.864	111.864	111.864	111.864	15.9597	111.864	111.864	111.864	111.864	111.864	111.864	111.864	111.864	111.864	111.864	15.9597	15.9597	15.9597	15.9597	111.864	111.864
	45	15.9597	15.9597	15.9597	15.9597	15.9597	0.231739	15.9597	0.904302	0	15.9597	15.9597	15.9597	15.9597	15.9597	4.98569	4.98569	15.9597	15.9597	15.9597	15.9597	15.9597	15.9597	111.864	111.864	111.864	111.864	111.864	111.864	111.864	111.864	111.864	15.9597	111.864	111.864	111.864	111.864	111.864	111.864	111.864	111.864	111.864	111.864	15.9597	15.9597	15.9597	15.9597	111.864	111.864
	50	1.5453	1.5453	1.5453	1.5453	1.5453	15.9597	1.5453	15.9597	15.9597	0	11.449	11.449	11.449	11.449	15.9597	15.9597	0.0561254	0.0561254	11.449	11.449	0.253243	11.449	111.864	111.864	111.864	111.864	111.864	111.864	111.864	111.864	111.864	11.449	111.864	111.864	111.864	111.864	111.864	111.864	111.864	111.864	111.864	111.864	11.449	11.449	11.449	11.449	111.864	111.864
	55	11.449	11.449	11.449	11.449	11.449	15.9597	11.449	15.9597	15.9597	11.449	0	2.74566	1.36937	2.74566	15.9597	15.9597	11.449	11.449	2.74566	2.74566	11.449	2.74566	111.864	111.864	111.864	111.864	111.864	111.864	111.864	111.864	111.864	2.74566	111.864	111.864	111.864	111.864	111.864	111.864	111.864	111.864	111.864	111.864	0.103179	2.74566	2.74566	0.997666	111.864	111.864
	60	11.449	11.449	11.449	11.449	11.449	15.9597	11.449	15.9597	15.9597	11.449	2.74566	0	2.74566	0.0637168	15.9597	15.9597	11.449	11.449	0.698145	0.698145	11.449	0.144558	111.864	111.864	111.864	111.864	111.864	111.864	111.864	111.864	111.864	0.698145	111.864	111.864	111.864	111.864	111.864	111.864	111.864	111.864	111.864	111.864	2.74566	0.698145	0.144558	2.74566	111.864	111.864
	65	11.449	11.449	11.449	11.449	11.449	15.9597	11.449	15.9597	15.9597	11.449	1.36937	2.74566	0	2.74566	15.9597	15.9597	11.449	11.449	2.74566	2.74566	11.449	2.74566	111.864	111.864	111.864	111.864	111.864	111.864	111.864	111.864	111.864	2.74566	111.864	111.864	111.864	111.864	111.864	111.864	111.864	111.864	111.864	111.864	1.36937	2.74566	2.74566	1.36937	111.864	111.864
	70	11.449	11.449	11.449	11.449	11.449	15.9597	11.449	15.9597	15.9597	11.449	2.74566	0.0637168	2.74566	0	15.9597	15.9597	11.449	11.449	0.698145	0.698145	11.449	0.144558	111.864	111.864	111.864	111.864	111.864	111.864	111.864	111.864	111.864	0.698145	111.864	111.864	111.864	111.864	111.864	111.864	111.864	111.864	111.864	111.864	2.74566	0.698145	0.144558	2.74566	111.864	111.864
	75	15.9597	15.9597	15.9597	15.9597	15.9597	4.98569	15.9597	4.98569	4.98569	15.9597	15.9597	15.9597	15.9597	15.9597	0	1.24745	15.9597	15.9597	15.9597	15.9597	15.9597	15.9597	111.864	111.864	111.864	111.864	111.864	111.864	111.864	111.864	111.864	15.9597	111.864	111.864	111.864	111.864	111.864	111.864	111.864	111.864	111.864	111.864	15.9597	15.9597	15.9597	15.9597	111.864	111.864
	80	15.9597	15.9597	15.9597	15.9597	15.9597	4.98569	15.9597	4.98569	4.98569	15.9597	15.9597	15.9597	15.9597	15.9597	1.24745	0	15.9597	15.9597	15.9597	15.9597	15.9597	15.9597	111.864	111.864	111.864	111.864	111.864	111.864	111.864	111.864	111.864	15.9597	111.864	111.864	111.864	111.864	111.864	111.864	111.864	111.864	111.864	111.864	15.9597	15.9597	15.9597	15.9597	111.864	111.864
	85	1.5453	1.5453	1.5453	1.5453	1.5453	15.9597	1.5453	15.9597	15.9597	0.0561254	11.449	11.449	11.449	11.449	15.9597	15.9597	0	0.0130767	11.449	11.449	0.253243	11.449	111.864	111.864	111.864	111.864	111.864	111.864	111.864	111.864	111.864	11.449	111.864	111.864	111.864	111.864	111.864	111.864	111.864	111.864	111.864	111.864	11.449	11.449	11.449	11.449	111.864	111.864
	90	1.5453	1.5453	1.5453	1.5453	1.5453	15.9597	1.5453	15.9597	15.9597	0.0561254	11.449	11.449	11.449	11.449	15.9597	15.9597	0.0130767	0	11.449	11.449	0.253243	11.449	111.864	111.864	111.864	111.864	111.864	111.864	111.864	111.864	111.864	11.449	111.864	111.864	111.864	111.864	111.864	111.864	111.864	111.864	111.864	111.864	11.449	11.449	11.449	11.449	111.864	111.864
	95	11.449	11.449	11.449	11.449	11.449	15.9597	11.449	15.9597	15.9597	11.449	2.74566	0.698145	2.74566	0.698145	15.9597	15.9597	11.449	11.449	0	0.159917	11.449	0.698145	111.864	111.864	111.864	111.864	111.864	111.864	111.864	111.864	111.864	0.0678494	111.864	111.864	111.864	111.864	111.864	111.864	111.864	111.864	111.864	111.864	2.74566	0.0678494	0.698145	2.74566	111.864	111.864
	100	11.449	11.449	11.449	11.449	11.449	15.9597	11.449	15.9597	15.9597	11.449	2.74566	0.698145	2.74566	0.698145	15.9597	15.9597	11.449	11.449	0.159917	0	11.449	0.698145	111.864	111.864	111.864	111.864	111.864	111.864	111.864	111.864	111.864	0.159917	111.864	111.864	111.864	111.864	111.864	111.864	111.864	111.864	111.864	111.864	2.74566	0.159917	0.698145	2.74566	111.864	111.864
	105	1.5453	1.5453	1.5453	1.5453	1.5453	15.9597	1.5453	15.9597	15.9597	0.253243	11.449	11.449	11.449	11.449	15.9597	15.9597	0.253243	0.253243	11.449	11.449	0	11.449	111.864	111.864	111.864	111.864	111.864	111.864	111.864	111.864	111.864	11.449	111.864	111.864	111.864	111.864	111.864	111.864	111.864	111.864	111.864	111.864	11.449	11.449	11.449	11.449	111.864	111.864
	110	11.449	11.449	11.449	11.449	11.449	15.9597	11.449	15.9597	15.9597	11.449	2.74566	0.144558	2.74566	0.144558	15.9597	15.9597	11.449	11.449	0.698145	0.698145	11.449	0	111.864	111.864	111.864	111.864	111.864	111.864	111.864	111.864	111.864	0.698145	111.864	111.864	111.864	111.864	111.864	111.864	111.864	111.864	111.864	111.864	2.74566	0.698145	0.0429824	2.74566	111.864	111.864
	115	111.864	111.864	111.864	111.864	111.864	111.864	111.864	111.864	111.864	111.864	111.864	111.864	111.864	111.864	111.864	111.864	111.864	111.864	111.864	111.864	111.864	111.864	0	0.29229	0.29229	0.0397566	0.0988486	2.37087	2.37087	2.37087	0.0988486	111.864	1.56681	1.56681	1.56681	15.7064	18.1561	1.56681	18.1561	18.1561	18.1561	1.56681	111.864	111.864	111.864	111.864	2.37087	15.7064
	120	111.864	111.864	111.864	111.864	111.864	111.864	111.864	111.864	111.864	111.864	111.864	111.864	111.864	111.864	111.864	111.864	111.864	111.864	111.864	111.864	111.864	111.864	0.29229	0	0.0317946	0.29229	0.29229	2.37087	2.37087	2.37087	0.29229	111.864	1.56681	1.56681	1.56681	15.7064	18.1561	1.56681	18.1561	18.1561	18.1561	1.56681	111.864	111.864	111.864	111.864	2.37087	15.7064
	125	111.864	111.864	111.864	111.864	111.864	111.864	111.864	111.864	111.864	111.864	111.864	111.864	111.864	111.864	111.864	111.864	111.864	111.864	111.864	111.864	111.864	111.864	0.29229	0.0317946	0	0.29229	0.29229	2.37087	2.37087	2.37087	0.29229	111.864	1.56681	1.56681	1.56681	15.7064	18.1561	1.56681	18.1561	18.1561	18.1561	1.56681	111.864	111.864	111.864	111.864	2.37087	15.7064
	130	111.864	111.864	111.864	111.864	111.864	111.864	111.864	111.864	111.864	111.864	111.864	111.864	111.864	111.864	111.864	111.864	111.864	111.864	111.864	111.864	111.864	111.864	0.0397566	0.29229	0.29229	0	0.0988486	2.37087	2.37087	2.37087	0.0988486	111.864	1.56681	1.56681	1.56681	15.7064	18.1561	1.56681	18.1561	18.1561	18.1561	1.56681	111.864	111.864	111.864	111.864	2.37087	15.7064
	135	111.864	111.864	111.864	111.864	111.864	111.864	111.864	111.864	111.864	111.864	111.864	111.864	111.864	111.864	111.864	111.864	111.864	111.864	111.864	111.864	111.864	111.864	0.0988486	0.29229	0.29229	0.0988486	0	2.37087	2.37087	2.37087	0.0068487	111.864	1.56681	1.56681	1.56681	15.7064	18.1561	1.56681	18.1561	18.1561	18.1561	1.56681	111.864	111.864	111.864	111.864	2.37087	15.7064
	140	111.864	111.864	111.864	111.864	111.864	111.864	111.864	111.864	111.864	111.864	111.864	111.864	111.864	111.864	111.864	111.864	111.864	111.864	111.864	111.864	111.864	111.864	2.37087	2.37087	2.37087	2.37087	2.37087	0	0.337717	0.058696	2.37087	111.864	2.37087	2.37087	2.37087	15.7064	18.1561	2.37087	18.1561	18.1561	18.1561	2.37087	111.864	111.864	111.864	111.864	0.178125	15.7064
	145	111.864	111.864	111.864	111.864	111.864	111.864	111.864	111.864	111.864	111.864	111.864	111.864	111.864	111.864	111.864	111.864	111.864	111.864	111.864	111.864	111.864	111.864	2.37087	2.37087	2.37087	2.37087	2.37087	0.337717	0	0.337717	2.37087	111.864	2.37087	2.37087	2.37087	15.7064	18.1561	2.37087	18.1561	18.1561	18.1561	2.37087	111.864	111.864	111.864	111.864	0.337717	15.7064
	150	111.864	111.864	111.864	111.864	111.864	111.864	111.864	111.864	111.864	111.864	111.864	111.864	111.864	111.864	111.864	111.864	111.864	111.864	111.864	111.864	111.864	111.864	2.37087	2.37087	2.37087	2.37087	2.37087	0.058696	0.337717	0	2.37087	111.864	2.37087	2.37087	2.37087	15.7064	18.1561	2.37087	18.1561	18.1561	18.1561	2.37087	111.864	111.864	111.864	111.864	0.178125	15.7064
	155	111.864	111.864	111.864	111.864	111.864	111.864	111.864	111.864	111.864	111.864	111.864	111.864	111.864	111.864	111.864	111.864	111.864	111.864	111.864	111.864	111.864	111.864	0.0988486	0.29229	0.29229	0.0988486	0.0068487	2.37087	2.37087	2.37087	0	111.864	1.56681	1.56681	1.56681	15.7064	18.1561	1.56681	18.1561	18.1561	18.1561	1.56681	111.864	111.864	111.864	111.864	2.37087	15.7064
	160	11.449	11.449	11.449	11.449	11.449	15.9597	11.449	15.9597	15.9597	11.449	2.74566	0.698145	2.74566	0.698145	15.9597	15.9597	11.449	11.449	0.0678494	0.159917	11.449	0.698145	111.864	111.864	111.864	111.864	111.864	111.864	111.864	111.864	111.864	0	111.864	111.864	111.864	111.864	111.864	111.864	111.864	111.864	111.864	111.864	2.74566	0.0383719	0.698145	2.74566	111.864	111.864
	165	111.864	111.864	111.864	111.864	111.864	111.864	111.864	111.864	111.864	111.864	111.864	111.864	111.864	111.864	111.864	111.864	111.864	111.864	111.864	111.864	111.864	111.864	1.56681	1.56681	1.56681	1.56681	1.56681	2.37087	2.37087	2.37087	1.56681	111.864	0	0.0482843	0.50213	15.7064	18.1561	0.198357	18.1561	18.1561	18.1561	0.198357	111.864	111.864	111.864	111.864	2.37087	15.7064
	170	111.864	111.864	111.864	111.864	111.864	111.864	111.864	111.864	111.864	111.864	111.864	111.864	111.864	111.864	111.864	111.864	111.864	111.864	111.864	111.864	111.864	111.864	1.56681	1.56681	1.56681	1.56681	1.56681	2.37087	2.37087	2.37087	1.56681	111.864	0.0482843	0	0.50213	15.7064	18.1561	0.198357	18.1561	18.1561	18.1561	0.198357	111.864	111.864	111.864	111.864	2.37087	15.7064
	175	111.864	111.864	111.864	111.864	111.864	111.864	111.864	111.864	111.864	111.864	111.864	111.864	111.864	111.864	111.864	111.864	111.864	111.864	111.864	111.864	111.864	111.864	1.56681	1.56681	1.56681	1.56681	1.56681	2.37087	2.37087	2.37087	1.56681	111.864	0.50213	0.50213	0	15.7064	18.1561	0.50213	18.1561	18.1561	18.1561	0.50213	111.864	111.864	111.864	111.864	2.37087	15.7064
	180	111.864	111.864	111.864	111.864	111.864	111.864	111.864	111.864	111.864	111.864	111.864	111.864	111.864	111.864	111.864	111.864	111.864	111.864	111.864	111.864	111.864	111.864	15.7064	15.7064	15.7064	15.7064	15.7064	15.7064	15.7064	15.7064	15.7064	111.864	15.7064	15.7064	15.7064	0	18.1561	15.7064	18.1561	18.1561	18.1561	15.7064	111.864	111.864	111.864	111.864	15.7064	0.817634
	185	111.864	111.864	111.864	111.864	111.864	111.864	111.864	111.864	111.864	111.864	111.864	111.864	111.864	111.864	111.864	111.864	111.864	111.864	111.864	111.864	111.864	111.864	18.1561	18.1561	18.1561	18.1561	18.1561	18.1561	18.1561	18.1561	18.1561	111.864	18.1561	18.1561	18.1561	18.1561	0	18.1561	0.180236	0.0111124	3.61201	18.1561	111.864	111.864	111.864	111.864	18.1561	18.1561
	190	111.864	111.864	111.864	111.864	111.864	111.864	111.864	111.864	111.864	111.864	111.864	111.864	111.864	111.864	111.864	111.864	111.864	111.864	111.864	111.864	111.864	111.864	1.56681	1.56681	1.56681	1.56681	1.56681	2.37087	2.37087	2.37087	1.56681	111.864	0.198357	0.198357	0.50213	15.7064	18.1561	0	18.1561	18.1561	18.1561	0.00835807	111.864	111.864	111.864	111.864	2.37087	15.7064
	195	111.864	111.864	111.864	111.864	111.864	111.864	111.864	111.864	111.864	111.864	111.864	111.864	111.864	111.864	111.864	111.864	111.864	111.864	111.864	111.864	111.864	111.864	18.1561	18.1561	18.1561	18.1561	18.1561	18.1561	18.1561	18.1561	18.1561	111.864	18.1561	18.1561	18.1561	18.1561	0.180236	18.1561	0	0.180236	3.61201	18.1561	111.864	111.864	111.864	111.864	18.1561	18.1561
	200	111.864	111.864	111.864	111.864	111.864	111.864	111.864	111.864	111.864	111.864	111.864	111.864	111.864	111.864	111.864	111.864	111.864	111.864	111.864	111.864	111.864	111.864	18.1561	18.1561	18.1561	18.1561	18.1561	18.1561	18.1561	18.1561	18.1561	111.864	18.1561	18.1561	18.1561	18.1561	0.0111124	18.1561	0.180236	0	3.61201	18.1561	111.864	111.864	111.864	111.864	18.1561	18.1561
	205	111.864	111.864	111.864	111.864	111.864	111.864	111.864	111.864	111.864	111.864	111.864	111.864	111.864	111.864	111.864	111.864	111.864	111.864	111.864	111.864	111.864	111.864	18.1561	18.1561	18.1561	18.1561	18.1561	18.1561	18.1561	18.1561	18.1561	111.864	18.1561	18.1561	18.1561	18.1561	3.61201	18.1561	3.61201	3.61201	0	18.1561	111.864	111.864	111.864	111.864	18.1561	18.1561
	210	111.864	111.864	111.864	111.864	111.864	111.864	111.864	111.864	111.864	111.864	111.864	111.864	111.864	111.864	111.864	111.864	111.864	111.864	111.864	111.864	111.864	111.864	1.56681	1.56681	1.56681	1.56681	1.56681	2.37087	2.37087	2.37087	1.56681	111.864	0.198357	0.198357	0.50213	15.7064	18.1561	0.00835807	18.1561	18.1561	18.1561	0	111.864	111.864	111.864	111.864	2.37087	15.7064
	215	11.449	11.449	11.449	11.449	11.449	15.9597	11.449	15.9597	15.9597	11.449	0.103179	2.74566	1.36937	2.74566	15.9597	15.9597	11.449	11.449	2.74566	2.74566	11.449	2.74566	111.864	111.864	111.864	111.864	111.864	111.864	111.864	111.864	111.864	2.74566	111.864	111.864	111.864	111.864	111.864	111.864	111.864	111.864	111.864	111.864	0	2.74566	2.74566	0.997666	111.864	111.864
	220	11.449	11.449	11.449	11.449	11.449	15.9597	11.449	15.9597	15.9597	11.449	2.74566	0.698145	2.74566	0.698145	15.9597	15.9597	11.449	11.449	0.0678494	0.159917	11.449	0.698145	111.864	111.864	111.864	111.864	111.864	111.864	111.864	111.864	111.864	0.0383719	111.864	111.864	111.864	111.864	111.864	111.864	111.864	111.864	111.864	111.864	2.74566	0	0.698145	2.74566	111.864	111.864
	225	11.449	11.449	11.449	11.449	11.449	15.9597	11.449	15.9597	15.9597	11.449	2.74566	0.144558	2.74566	0.144558	15.9597	15.9597	11.449	11.449	0.698145	0.698145	11.449	0.0429824	111.864	111.864	111.864	111.864	111.864	111.864	111.864	111.864	111.864	0.698145	111.864	111.864	111.864	111.864	111.864	111.864	111.864	111.864	111.864	111.864	2.74566	0.698145	0	2.74566	111.864	111.864
	230	11.449	11.449	11.449	11.449	11.449	15.9597	11.449	15.9597	15.9597	11.449	0.997666	2.74566	1.36937	2.74566	15.9597	15.9597	11.449	11.449	2.74566	2.74566	11.449	2.74566	111.864	111.864	111.864	111.864	111.864	111.864	111.864	111.864	111.864	2.74566	111.864	111.864	111.864	111.864	111.864	111.864	111.864	111.864	111.864	111.864	0.997666	2.74566	2.74566	0	111.864	111.864
	235	111.864	111.864	111.864	111.864	111.864	111.864	111.864	111.864	111.864	111.864	111.864	111.864	111.864	111.864	111.864	111.864	111.864	111.864	111.864	111.864	111.864	111.864	2.37087	2.37087	2.37087	2.37087	2.37087	0.178125	0.337717	0.178125	2.37087	111.864	2.37087	2.37087	2.37087	15.7064	18.1561	2.37087	18.1561	18.1561	18.1561	2.37087	111.864	111.864	111.864	111.864	0	15.7064
	240	111.864	111.864	111.864	111.864	111.864	111.864	111.864	111.864	111.864	111.864	111.864	111.864	111.864	111.864	111.864	111.864	111.864	111.864	111.864	111.864	111.864	111.864	15.7064	15.7064	15.7064	15.7064	15.7064	15.7064	15.7064	15.7064	15.7064	111.864	15.7064	15.7064	15.7064	0.817634	18.1561	15.7064	18.1561	18.1561	18.1561	15.7064	111.864	111.864	111.864	111.864	15.7064	0
	245	111.864	111.864	111.864	111.864	111.864	111.864	111.864	111.864	111.864	111.864	111.864	111.864	111.864	111.864	111.864	111.864	111.864	111.864	111.864	111.864	111.864	111.864	18.1561	18.1561	18.1561	18.1561	18.1561	18.1561	18.1561	18.1561	18.1561	111.864	18.1561	18.1561	18.1561	18.1561	3.61201	18.1561	3.61201	3.61201	0.253663	18.1561	111.864	111.864	111.864	111.864	18.1561	18.1561
	250	111.864	111.864	111.864	111.864	111.864	111.864	111.864	111.864	111.864	111.864	111.864	111.864	111.864	111.864	111.864	111.864	111.864	111.864	111.864	111.864	111.864	111.864	18.1561	18.1561	18.1561	18.1561	18.1561	18.1561	18.1561	18.1561	18.1561	111.864	18.1561	18.1561	18.1561	18.1561	3.61201	18.1561	3.61201	3.61201	0.253663	18.1561	111.864	111.864	111.864	111.864	18.1561	18.1561
	255	111.864	111.864	111.864	111.864	111.864	111.864	111.864	111.864	111.864	111.864	111.864	111.864	111.864	111.864	111.864	111.864	111.864	111.864	111.864	111.864	111.864	111.864	18.1561	18.1561	18.1561	18.1561	18.1561	18.1561	18.1561	18.1561	18.1561	111.864	18.1561	18.1561	18.1561	18.1561	1.30768	18.1561	1.30768	1.30768	3.61201	18.1561	111.864	111.864	111.864	111.864	18.1561	18.1561
	260	111.864	111.864	111.864	111.864	111.864	111.864	111.864	111.864	111.864	111.864	111.864	111.864	111.864	111.864	111.864	111.864	111.864	111.864	111.864	111.864	111.864	111.864	1.56681	1.56681	1.56681	1.56681	1.56681	2.37087	2.37087	2.37087	1.56681	111.864	0.50213	0.50213	0.0302815	15.7064	18.1561	0.50213	18.1561	18.1561	18.1561	0.50213	111.864	111.864	111.864	111.864	2.37087	15.7064
	265	111.864	111.864	111.864	111.864	111.864	111.864	111.864	111.864	111.864	111.864	111.864	111.864	111.864	111.864	111.864	111.864	111.864	111.864	111.864	111.864	111.864	111.864	15.7064	15.7064	15.7064	15.7064	15.7064	15.7064	15.7064	15.7064	15.7064	111.864	15.7064	15.7064	15.7064	0.136673	18.1561	15.7064	18.1561	18.1561	18.1561	15.7064	111.864	111.864	111.864	111.864	15.7064	0.817634
	270	111.864	111.864	111.864	111.864	111.864	111.864	111.864	111.864	111.864	111.864	111.864	111.864	111.864	111.864	111.864	111.864	111.864	111.864	111.864	111.864	111.864	111.864	15.7064	15.7064	15.7064	15.7064	15.7064	15.7064	15.7064	15.7064	15.7064	111.864	15.7064	15.7064	15.7064	0.0408418	18.1561	15.7064	18.1561	18.1561	18.1561	15.7064	111.864	111.864	111.864	111.864	15.7064	0.817634
	275	111.864	111.864	111.864	111.864	111.864	111.864	111.864	111.864	111.864	111.864	111.864	111.864	111.864	111.864	111.864	111.864	111.864	111.864	111.864	111.864	111.864	111.864	15.7064	15.7064	15.7064	15.7064	15.7064	15.7064	15.7064	15.7064	15.7064	111.864	15.7064	15.7064	15.7064	5.29406	18.1561	15.7064	18.1561	18.1561	18.1561	15.7064	111.864	111.864	111.864	111.864	15.7064	5.29406
	280	111.864	111.864	111.864	111.864	111.864	111.864	111.864	111.864	111.864	111.864	111.864	111.864	111.864	111.864	111.864	111.864	111.864	111.864	111.864	111.864	111.864	111.864	15.7064	15.7064	15.7064	15.7064	15.7064	15.7064	15.7064	15.7064	15.7064	111.864	15.7064	15.7064	15.7064	5.29406	18.1561	15.7064	18.1561	18.1561	18.1561	15.7064	111.864	111.864	111.864	111.864	15.7064	5.29406
	285	111.864	111.864	111.864	111.864	111.864	111.864	111.864	111.864	111.864	111.864	111.864	111.864	111.864	111.864	111.864	111.864	111.864	111.864	111.864	111.864	111.864	111.864	18.1561	18.1561	18.1561	18.1561	18.1561	18.1561	18.1561	18.1561	18.1561	111.864	18.1561	18.1561	18.1561	18.1561	1.30768	18.1561	1.30768	1.30768	3.61201	18.1561	111.864	111.864	111.864	111.864	18.1561	18.1561
	290	111.864	111.864	111.864	111.864	111.864	111.864	111.864	111.864	111.864	111.864	111.864	111.864	111.864	111.864	111.864	111.864	111.864	111.864	111.864	111.864	111.864	111.864	18.1561	18.1561	18.1561	18.1561	18.1561	18.1561	18.1561	18.1561	18.1561	111.864	18.1561	18.1561	18.1561	18.1561	1.30768	18.1561	1.30768	1.30768	3.61201	18.1561	111.864	111.864	111.864	111.864	18.1561	18.1561
	295	111.864	111.864	111.864	111.864	111.864	111.864	111.864	111.864	111.864	111.864	111.864	111.864	111.864	111.864	111.864	111.864	111.864	111.864	111.864	111.864	111.864	111.864	18.1561	18.1561	18.1561	18.1561	18.1561	18.1561	18.1561	18.1561	18.1561	111.864	18.1561	18.1561	18.1561	18.1561	1.30768	18.1561	1.30768	1.30768	3.61201	18.1561	111.864	111.864	111.864	111.864	18.1561	18.1561
	300	111.864	111.864	111.864	111.864	111.864	111.864	111.864	111.864	111.864	111.864	111.864	111.864	111.864	111.864	111.864	111.864	111.864	111.864	111.864	111.864	111.864	111.864	15.7064	15.7064	15.7064	15.7064	15.7064	15.7064	15.7064	15.7064	15.7064	111.864	15.7064	15.7064	15.7064	0.136673	18.1561	15.7064	18.1561	18.1561	18.1561	15.7064	111.864	111.864	111.864	111.864	15.7064	0.817634
	305	111.864	111.864	111.864	111.864	111.864	111.864	111.864	111.864	111.864	111.864	111.864	111.864	111.864	111.864	111.864	111.864	111.864	111.864	111.864	111.864	111.864	111.864	15.7064	15.7064	15.7064	15.7064	15.7064	15.7064	15.7064	15.7064	15.7064	111.864	15.7064	15.7064	15.7064	0.817634	18.1561	15.7064	18.1561	18.1561	18.1561	15.7064	111.864	111.864	111.864	111.864	15.7064	0.24153
	310	111.864	111.864	111.864	111.864	111.864	111.864	111.864	111.864	111.864	111.864	111.864	111.864	111.864	111.864	111.864	111.864	111.864	111.864	111.864	111.864	111.864	111.864	15.7064	15.7064	15.7064	15.7064	15.7064	15.7064	15.7064	15.7064	15.7064	111.864	15.7064	15.7064	15.7064	5.29406	18.1561	15.7064	18.1561	18.1561	18.1561	15.7064	111.864	111.864	111.864	111.864	15.7064	5.29406
	315	111.864	111.864	111.864	111.864	111.864	111.864	111.864	111.864	111.864	111.864	111.864	111.864	111.864	111.864	111.864	111.864	111.864	111.864	111.864	111.864	111.864	111.864	15.7064	15.7064	15.7064	15.7064	15.7064	15.7064	15.7064	15.7064	15.7064	111.864	15.7064	15.7064	15.7064	5.29406	18.1561	15.7064	18.1561	18.1561	18.1561	15.7064	111.864	111.864	111.864	111.864	15.7064	5.29406
	320	111.864	111.864	111.864	111.864	111.864	111.864	111.864	111.864	111.864	111.864	111.864	111.864	111.864	111.864	111.864	111.864	111.864	111.864	111.864	111.864	111.864	111.864	15.7064	15.7064	15.7064	15.7064	15.7064	15.7064	15.7064	15.7064	15.7064	111.864	15.7064	15.7064	15.7064	5.29406	18.1561	15.7064	18.1561	18.1561	18.1561	15.7064	111.864	111.864	111.864	111.864	15.7064	5.29406
	325	111.864	111.864	111.864	111.864	111.864	111.864	111.864	111.864	111.864	111.864	111.864	111.864	111.864	111.864	111.864	111.864	111.864	111.864	111.864	111.864	111.864	111.864	15.7064	15.7064	15.7064	15.7064	15.7064	15.7064	15.7064	15.7064	15.7064	111.864	15.7064	15.7064	15.7064	5.29406	18.1561	15.7064	18.1561	18.1561	18.1561	15.7064	111.864	111.864	111.864	111.864	15.7064	5.29406
	330	111.864	111.864	111.864	111.864	111.864	111.864	111.864	111.864	111.864	111.864	111.864	111.864	111.864	111.864	111.864	111.864	111.864	111.864	111.864	111.864	111.864	111.864	15.7064	15.7064	15.7064	15.7064	15.7064	15.7064	15.7064	15.7064	15.7064	111.864	15.7064	15.7064	15.7064	5.29406	18.1561	15.7064	18.1561	18.1561	18.1561	15.7064	111.864	111.864	111.864	111.864	15.7064	5.29406
	335	111.864	111.864	111.864	111.864	111.864	111.864	111.864	111.864	111.864	111.864	111.864	111.864	111.864	111.864	111.864	111.864	111.864	111.864	111.864	111.864	111.864	111.864	15.7064	15.7064	15.7064	15.7064	15.7064	15.7064	15.7064	15.7064	15.7064	111.864	15.7064	15.7064	15.7064	1.31562	18.1561	15.7064	18.1561	18.1561	18.1561	15.7064	111.864	111.864	111.864	111.864	15.7064	1.31562
	340	111.864	111.864	111.864	111.864	111.864	111.864	111.864	111.864	111.864	111.864	111.864	111.864	111.864	111.864	111.864	111.864	111.864	111.864	111.864	111.864	111.864	111.864	15.7064	15.7064	15.7064	15.7064	15.7064	15.7064	15.7064	15.7064	15.7064	111.864	15.7064	15.7064	15.7064	5.29406	18.1561	15.7064	18.1561	18.1561	18.1561	15.7064	111.864	111.864	111.864	111.864	15.7064	5.29406
	345	111.864	111.864	111.864	111.864	111.864	111.864	111.864	111.864	111.864	111.864	111.864	111.864	111.864	111.864	111.864	111.864	111.864	111.864	111.864	111.864	111.864	111.864	15.7064	15.7064	15.7064	15.7064	15.7064	15.7064	15.7064	15.7064	15.7064	111.864	15.7064	15.7064	15.7064	5.29406	18.1561	15.7064	18.1561	18.1561	18.1561	15.7064	111.864	111.864	111.864	111.864	15.7064	5.29406
	350	111.864	111.864	111.864	111.864	111.864	111.864	111.864	111.864	111.864	111.864	111.864	111.864	111.864	111.864	111.864	111.864	111.864	111.864	111.864	111.864	111.864	111.864	15.7064	15.7064	15.7064	15.7064	15.7064	15.7064	15.7064	15.7064	15.7064	111.864	15.7064	15.7064	15.7064	5.29406	18.1561	15.7064	18.1561	18.1561	18.1561	15.7064	111.864	111.864	111.864	111.864	15.7064	5.29406
	355	111.864	111.864	111.864	111.864	111.864	111.864	111.864	111.864	111.864	111.864	111.864	111.864	111.864	111.864	111.864	111.864	111.864	111.864	111.864	111.864	111.864	111.864	15.7064	15.7064	15.7064	15.7064	15.7064	15.7064	15.7064	15.7064	15.7064	111.864	15.7064	15.7064	15.7064	5.29406	18.1561	15.7064	18.1561	18.1561	18.1561	15.7064	111.864	111.864	111.864	111.864	15.7064	5.29406
	360	111.864	111.864	111.864	111.864	111.864	111.864	111.864	111.864	111.864	111.864	111.864	111.864	111.864	111.864	111.864	111.864	111.864	111.864	111.864	111.864	111.864	111.864	15.7064	15.7064	15.7064	15.7064	15.7064	15.7064	15.7064	15.7064	15.7064	111.864	15.7064	15.7064	15.7064	5.29406	18.1561	15.7064	18.1561	18.1561	18.1561	15.7064	111.864	111.864	111.864	111.864	15.7064	5.29406
	365	111.864	111.864	111.864	111.864	111.864	111.864	111.864	111.864	111.864	111.864	111.864	111.864	111.864	111.864	111.864	111.864	111.864	111.864	111.864	111.864	111.864	111.864	15.7064	15.7064	15.7064	15.7064	15.7064	15.7064	15.7064	15.7064	15.7064	111.864	15.7064	15.7064	15.7064	5.29406	18.1561	15.7064	18.1561	18.1561	18.1561	15.7064	111.864	111.864	111.864	111.864	15.7064	5.29406
	370	111.864	111.864	111.864	111.864	111.864	111.864	111.864	111.864	111.864	111.864	111.864	111.864	111.864	111.864	111.864	111.864	111.864	111.864	111.864	111.864	111.864	111.864	15.7064	15.7064	15.7064	15.7064	15.7064	15.7064	15.7064	15.7064	15.7064	111.864	15.7064	15.7064	15.7064	5.29406	18.1561	15.7064	18.1561	18.1561	18.1561	15.7064	111.864	111.864	111.864	111.864	15.7064	5.29406
	375	111.864	111.864	111.864	111.864	111.864	111.864	111.864	111.864	111.864	111.864	111.864	111.864	111.864	111.864	111.864	111.864	111.864	111.864	111.864	111.864	111.864	111.864	15.7064	15.7064	15.7064	15.7064	15.7064	15.7064	15.7064	15.7064	15.7064	111.864	15.7064	15.7064	15.7064	5.29406	18.1561	15.7064	18.1561	18.1561	18.1561	15.7064	111.864	111.864	111.864	111.864	15.7064	5.29406
	380	111.864	111.864	111.864	111.864	111.864	111.864	111.864	111.864	111.864	111.864	111.864	111.864	111.864	111.864	111.864	111.864	111.864	111.864	111.864	111.864	111.864	111.864	15.7064	15.7064	15.7064	15.7064	15.7064	15.7064	15.7064	15.7064	15.7064	111.864	15.7064	15.7064	15.7064	5.29406	18.1561	15.7064	18.1561	18.1561	18.1561	15.7064	111.864	111.864	111.864	111.864	15.7064	5.29406
	385	111.864	111.864	111.864	111.864	111.864	111.864	111.864	111.864	111.864	111.864	111.864	111.864	111.864	111.864	111.864	111.864	111.864	111.864	111.864	111.864	111.864	111.864	15.7064	15.7064	15.7064	15.7064	15.7064	15.7064	15.7064	15.7064	15.7064	111.864	15.7064	15.7064	15.7064	1.31562	18.1561	15.7064	18.1561	18.1561	18.1561	15.7064	111.864	111.864	111.864	111.864	15.7064	1.31562
	390	111.864	111.864	111.864	111.864	111.864	111.864	111.864	111.864	111.864	111.864	111.864	111.864	111.864	111.864	111.864	111.864	111.864	111.864	111.864	111.864	111.864	111.864	15.7064	15.7064	15.7064	15.7064	15.7064	15.7064	15.7064	15.7064	15.7064	111.864	15.7064	15.7064	15.7064	0.136673	18.1561	15.7064	18.1561	18.1561	18.1561	15.7064	111.864	111.864	111.864	111.864	15.7064	0.817634
	395	111.864	111.864	111.864	111.864	111.864	111.864	111.864	111.864	111.864	111.864	111.864	111.864	111.864	111.864	111.864	111.864	111.864	111.864	111.864	111.864	111.864	111.864	15.7064	15.7064	15.7064	15.7064	15.7064	15.7064	15.7064	15.7064	15.7064	111.864	15.7064	15.7064	15.7064	1.31562	18.1561	15.7064	18.1561	18.1561	18.1561	15.7064	111.864	111.864	111.864	111.864	15.7064	1.31562
	400	111.864	111.864	111.864	111.864	111.864	111.864	111.864	111.864	111.864	111.864	111.864	111.864	111.864	111.864	111.864	111.864	111.864	111.864	111.864	111.864	111.864	111.864	15.7064	15.7064	15.7064	15.7064	15.7064	15.7064	15.7064	15.7064	15.7064	111.864	15.7064	15.7064	15.7064	0.817634	18.1561	15.7064	18.1561	18.1561	18.1561	15.7064	111.864	111.864	111.864	111.864	15.7064	0.24153
	405	11.449	11.449	11.449	11.449	11.449	15.9597	11.449	15.9597	15.9597	11.449	0.22558	2.74566	1.36937	2.74566	15.9597	15.9597	11.449	11.449	2.74566	2.74566	11.449	2.74566	111.864	111.864	111.864	111.864	111.864	111.864	111.864	111.864	111.864	2.74566	111.864	111.864	111.864	111.864	111.864	111.864	111.864	111.864	111.864	111.864	0.22558	2.74566	2.74566	0.997666	111.864	111.864
	410	111.864	111.864	111.864	111.864	111.864	111.864	111.864	111.864	111.864	111.864	111.864	111.864	111.864	111.864	111.864	111.864	111.864	111.864	111.864	111.864	111.864	111.864	15.7064	15.7064	15.7064	15.7064	15.7064	15.7064	15.7064	15.7064	15.7064	111.864	15.7064	15.7064	15.7064	1.31562	18.1561	15.7064	18.1561	18.1561	18.1561	15.7064	111.864	111.864	111.864	111.864	15.7064	1.31562
	415	111.864	111.864	111.864	111.864	111.864	111.864	111.864	111.864	111.864	111.864	111.864	111.864	111.864	111.864	111.864	111.864	111.864	111.864	111.864	111.864	111.864	111.864	15.7064	15.7064	15.7064	15.7064	15.7064	15.7064	15.7064	15.7064	15.7064	111.864	15.7064	15.7064	15.7064	1.31562	18.1561	15.7064	18.1561	18.1561	18.1561	15.7064	111.864	111.864	111.864	111.864	15.7064	1.31562
	420	111.864	111.864	111.864	111.864	111.864	111.864	111.864	111.864	111.864	111.864	111.864	111.864	111.864	111.864	111.864	111.864	111.864	111.864	111.864	111.864	111.864	111.864	15.7064	15.7064	15.7064	15.7064	15.7064	15.7064	15.7064	15.7064	15.7064	111.864	15.7064	15.7064	15.7064	5.29406	18.1561	15.7064	18.1561	18.1561	18.1561	15.7064	111.864	111.864	111.864	111.864	15.7064	5.29406
	425	15.9597	15.9597	15.9597	15.9597	15.9597	4.98569	15.9597	4.98569	4.98569	15.9597	15.9597	15.9597	15.9597	15.9597	1.24745	0.387219	15.9597	15.9597	15.9597	15.9597	15.9597	15.9597	111.864	111.864	111.864	111.864	111.864	111.864	111.864	111.864	111.864	15.9597	111.864	111.864	111.864	111.864	111.864	111.864	111.864	111.864	111.864	111.864	15.9597	15.9597	15.9597	15.9597	111.864	111.864
	430	111.864	111.864	111.864	111.864	111.864	111.864	111.864	111.864	111.864	111.864	111.864	111.864	111.864	111.864	111.864	111.864	111.864	111.864	111.864	111.864	111.864	111.864	15.7064	15.7064	15.7064	15.7064	15.7064	15.7064	15.7064	15.7064	15.7064	111.864	15.7064	15.7064	15.7064	1.31562	18.1561	15.7064	18.1561	18.1561	18.1561	15.7064	111.864	111.864	111.864	111.864	15.7064	1.31562
	435	111.864	111.864	111.864	111.864	111.864	111.864	111.864	111.864	111.864	111.864	111.864	111.864	111.864	111.864	111.864	111.864	111.864	111.864	111.864	111.864	111.864	111.864	15.7064	15.7064	15.7064	15.7064	15.7064	15.7064	15.7064	15.7064	15.7064	111.864	15.7064	15.7064	15.7064	0.817634	18.1561	15.7064	18.1561	18.1561	18.1561	15.7064	111.864	111.864	111.864	111.864	15.7064	0.24153
	440	111.864	111.864	111.864	111.864	111.864	111.864	111.864	111.864	111.864	111.864	111.864	111.864	111.864	111.864	111.864	111.864	111.864	111.864	111.864	111.864	111.864	111.864	15.7064	15.7064	15.7064	15.7064	15.7064	15.7064	15.7064	15.7064	15.7064	111.864	15.7064	15.7064	15.7064	0.817634	18.1561	15.7064	18.1561	18.1561	18.1561	15.7064	111.864	111.864	111.864	111.864	15.7064	0.24153
	445	111.864	111.864	111.864	111.864	111.864	111.864	111.864	111.864	111.864	111.864	111.864	111.864	111.864	111.864	111.864	111.864	111.864	111.864	111.864	111.864	111.864	111.864	15.7064	15.7064	15.7064	15.7064	15.7064	15.7064	15.7064	15.7064	15.7064	111.864	15.7064	15.7064	15.7064	1.31562	18.1561	15.7064	18.1561	18.1561	18.1561	15.7064	111.864	111.864	111.864	111.864	15.7064	1.31562
	450	111.864	111.864	111.864	111.864	111.864	111.864	111.864	111.864	111.864	111.864	111.864	111.864	111.864	111.864	111.864	111.864	111.864	111.864	111.864	111.864	111.864	111.864	15.7064	15.7064	15.7064	15.7064	15.7064	15.7064	15.7064	15.7064	15.7064	111.864	15.7064	15.7064	15.7064	0.817634	18.1561	15.7064	18.1561	18.1561	18.1561	15.7064	111.864	111.864	111.864	111.864	15.7064	0.00244386
	455	111.864	111.864	111.864	111.864	111.864	111.864	111.864	111.864	111.864	111.864	111.864	111.864	111.864	111.864	111.864	111.864	111.864	111.864	111.864	111.864	111.864	111.864	15.7064	15.7064	15.7064	15.7064	15.7064	15.7064	15.7064	15.7064	15.7064	111.864	15.7064	15.7064	15.7064	0.817634	18.1561	15.7064	18.1561	18.1561	18.1561	15.7064	111.864	111.864	111.864	111.864	15.7064	0.0294586
	460	111.864	111.864	111.864	111.864	111.864	111.864	111.864	111.864	111.864	111.864	111.864	111.864	111.864	111.864	111.864	111.864	111.864	111.864	111.864	111.864	111.864	111.864	18.1561	18.1561	18.1561	18.1561	18.1561	18.1561	18.1561	18.1561	18.1561	111.864	18.1561	18.1561	18.1561	18.1561	1.30768	18.1561	1.30768	1.30768	3.61201	18.1561	111.864	111.864	111.864	111.864	18.1561	18.1561
	465	111.864	111.864	111.864	111.864	111.864	111.864	111.864	111.864	111.864	111.864	111.864	111.864	111.864	111.864	111.864	111.864	111.864	111.864	111.864	111.864	111.864	111.864	15.7064	15.7064	15.7064	15.7064	15.7064	15.7064	15.7064	15.7064	15.7064	111.864	15.7064	15.7064	15.7064	1.31562	18.1561	15.7064	18.1561	18.1561	18.1561	15.7064	111.864	111.864	111.864	111.864	15.7064	1.31562
	470	111.864	111.864	111.864	111.864	111.864	111.864	111.864	111.864	111.864	111.864	111.864	111.864	111.864	111.864	111.864	111.864	111.864	111.864	111.864	111.864	111.864	111.864	18.1561	18.1561	18.1561	18.1561	18.1561	18.1561	18.1561	18.1561	18.1561	111.864	18.1561	18.1561	18.1561	18.1561	0.0213932	18.1561	0.180236	0.0213932	3.61201	18.1561	111.864	111.864	111.864	111.864	18.1561	18.1561
	475	15.9597	15.9597	15.9597	15.9597	15.9597	4.98569	15.9597	4.98569	4.98569	15.9597	15.9597	15.9597	15.9597	15.9597	1.24745	0.387219	15.9597	15.9597	15.9597	15.9597	15.9597	15.9597	111.864	111.864	111.864	111.864	111.864	111.864	111.864	111.864	111.864	15.9597	111.864	111.864	111.864	111.864	111.864	111.864	111.864	111.864	111.864	111.864	15.9597	15.9597	15.9597	15.9597	111.864	111.864
	480	111.864	111.864	111.864	111.864	111.864	111.864	111.864	111.864	111.864	111.864	111.864	111.864	111.864	111.864	111.864	111.864	111.864	111.864	111.864	111.864	111.864	111.864	15.7064	15.7064	15.7064	15.7064	15.7064	15.7064	15.7064	15.7064	15.7064	111.864	15.7064	15.7064	15.7064	5.29406	18.1561	15.7064	18.1561	18.1561	18.1561	15.7064	111.864	111.864	111.864	111.864	15.7064	5.29406
	485	111.864	111.864	111.864	111.864	111.864	111.864	111.864	111.864	111.864	111.864	111.864	111.864	111.864	111.864	111.864	111.864	111.864	111.864	111.864	111.864	111.864	111.864	15.7064	15.7064	15.7064	15.7064	15.7064	15.7064	15.7064	15.7064	15.7064	111.864	15.7064	15.7064	15.7064	0.0408418	18.1561	15.7064	18.1561	18.1561	18.1561	15.7064	111.864	111.864	111.864	111.864	15.7064	0.817634
	490	111.864	111.864	111.864	111.864	111.864	111.864	111.864	111.864	111.864	111.864	111.864	111.864	111.864	111.864	111.864	111.864	111.864	111.864	111.864	111.864	111.864	111.864	15.7064	15.7064	15.7064	15.7064	15.7064	15.7064	15.7064	15.7064	15.7064	111.864	15.7064	15.7064	15.7064	5.29406	18.1561	15.7064	18.1561	18.1561	18.1561	15.7064	111.864	111.864	111.864	111.864	15.7064	5.29406
	495	111.864	111.864	111.864	111.864	111.864	111.864	111.864	111.864	111.864	111.864	111.864	111.864	111.864	111.864	111.864	111.864	111.864	111.864	111.864	111.864	111.864	111.864	18.1561	18.1561	18.1561	18.1561	18.1561	18.1561	18.1561	18.1561	18.1561	111.864	18.1561	18.1561	18.1561	18.1561	1.30768	18.1561	1.30768	1.30768	3.61201	18.1561	111.864	111.864	111.864	111.864	18.1561	18.1561
	500	111.864	111.864	111.864	111.864	111.864	111.864	111.864	111.864	111.864	111.864	111.864	111.864	111.864	111.864	111.864	111.864	111.864	111.864	111.864	111.864	111.864	111.864	18.1561	18.1561	18.1561	18.1561	18.1561	18.1561	18.1561	18.1561	18.1561	111.864	18.1561	18.1561	18.1561	18.1561	1.30768	18.1561	1.30768	1.30768	3.61201	18.1561	111.864	111.864	111.864	111.864	18.1561	18.1561
	505	111.864	111.864	111.864	111.864	111.864	111.864	111.864	111.864	111.864	111.864	111.864	111.864	111.864	111.864	111.864	111.864	111.864	111.864	111.864	111.864	111.864	111.864	18.1561	18.1561	18.1561	18.1561	18.1561	18.1561	18.1561	18.1561	18.1561	111.864	18.1561	18.1561	18.1561	18.1561	0.556839	18.1561	0.556839	0.556839	3.61201	18.1561	111.864	111.864	111.864	111.864	18.1561	18.1561
	510	111.864	111.864	111.864	111.864	111.864	111.864	111.864	111.864	111.864	111.864	111.864	111.864	111.864	111.864	111.864	111.864	111.864	111.864	111.864	111.864	111.864	111.864	18.1561	18.1561	18.1561	18.1561	18.1561	18.1561	18.1561	18.1561	18.1561	111.864	18.1561	18.1561	18.1561	18.1561	0.556839	18.1561	0.556839	0.556839	3.61201	18.1561	111.864	111.864	111.864	111.864	18.1561	18.1561
	515	111.864	111.864	111.864	111.864	111.864	111.864	111.864	111.864	111.864	111.864	111.864	111.864	111.864	111.864	111.864	111.864	111.864	111.864	111.864	111.864	111.864	111.864	18.1561	18.1561	18.1561	18.1561	18.1561	18.1561	18.1561	18.1561	18.1561	111.864	18.1561	18.1561	18.1561	18.1561	3.61201	18.1561	3.61201	3.61201	1.71291	18.1561	111.864	111.864	111.864	111.864	18.1561	18.1561
	520	111.864	111.864	111.864	111.864	111.864	111.864	111.864	111.864	111.864	111.864	111.864	111.864	111.864	111.864	111.864	111.864	111.864	111.864	111.864	111.864	111.864	111.864	18.1561	18.1561	18.1561	18.1561	18.1561	18.1561	18.1561	18.1561	18.1561	111.864	18.1561	18.1561	18.1561	18.1561	0.556839	18.1561	0.556839	0.556839	3.61201	18.1561	111.864	111.864	111.864	111.864	18.1561	18.1561
	523	111.864	111.864	111.864	111.864	111.864	111.864	111.864	111.864	111.864	111.864	111.864	111.864	111.864	111.864	111.864	111.864	111.864	111.864	111.864	111.864	111.864	111.864	18.1561	18.1561	18.1561	18.1561	18.1561	18.1561	18.1561	18.1561	18.1561	111.864	18.1561	18.1561	18.1561	18.1561	3.61201	18.1561	3.61201	3.61201	1.71291	18.1561	111.864	111.864	111.864	111.864	18.1561	18.1561
	Variance decomposition for the optimal classification:
		Absolute	Percent
	Within-class	3.13373	0.633919
	Between-classes	1.80969	0.366081
	Total	4.94342	1
	Class centroids:
	Class	Grain Size	Zr:Rb	Net IRSL (x10^⁻⁴)	Net OSL (x10^⁻⁴)	IRSL:OSL
	1	1.16218	1.0191	0.383974	0.668723	-0.87563
	2	-0.52601	-0.488774	-0.269783	-0.283992	-0.0197711
	3	-0.403965	-0.14309	0.188875	-0.218849	1.44085
	Distances between the class centroids:
		1	2	3
	1	0	2.68165	3.16155
	2	2.68165	0	1.57557
	3	3.16155	1.57557	0
	Central objects:
	Class	Grain Size	Zr:Rb	Net IRSL (x10^⁻⁴)	Net OSL (x10^⁻⁴)	IRSL:OSL
	1 (70)	1.6885	1.01888	0.361808	0.648883	-0.52425
	2 (435)	-0.615648	-0.728253	-0.478275	-0.478457	0.000590075
	3 (500)	-0.276198	0.130448	0.0620975	-0.35083	1.61831
	Distances between the central objects:
		1 (70)	2 (435)	3 (500)
	1 (70)	0	3.25786	3.2139
	2 (435)	3.25786	0	1.94368
	3 (500)	3.2139	1.94368	0
	Results by class:
	Class	1	2	3
	Objects	30	56	19
	Sum of weights	30	56	19
	Within-class variance	6.90064	1.64566	1.61167
	Minimum distance to centroid	0.633534	0.383517	0.395136
	Average distance to centroid	2.36955	1.13836	1.14333
	Maximum distance to centroid	6.02164	3.36482	1.93264
		5	115	185
		10	120	195
		15	125	200
		20	130	205
		25	135	245
		30	140	250
		35	145	255
		40	150	285
		45	155	290
		50	165	295
		55	170	460
		60	175	470
		65	180	495
		70	190	500
		75	210	505
		80	235	510
		85	240	515
		90	260	520
		95	265	522
		100	270
		105	275
		110	280
		160	300
		215	305
		220	310
		225	315
		230	320
		405	325
		425	330
		475	335
			340
			345
			350
			355
			360
			365
			370
			375
			380
			385
			390
			395
			400
			410
			415
			420
			430
			435
			440
			445
			450
			455
			465
			480
			485
			490
	Results by object:
	Observation	Class
	0
	1
	2
	3
	4
	5	1
	6
	7
	8
	9
	10	1
	11
	12
	13
	14
	15	1
	16
	17
	18
	19
	20	1
	21
	22
	23
	24
	25	1
	26
	27
	28
	29
	30	1
	31
	32
	33
	34
	35	1
	36
	37
	38
	39
	40	1
	41
	42
	43
	44
	45	1
	46
	47
	48
	49
	50	1
	51
	52
	53
	54
	55	1
	56
	57
	58
	59
	60	1
	61
	62
	63
	64
	65	1
	66
	67
	68
	69
	70	1
	71
	72
	73
	74
	75	1
	76
	77
	78
	79
	80	1
	81
	82
	83
	84
	85	1
	86
	87
	88
	89
	90	1
	91
	92
	93
	94
	95	1
	96
	97
	98
	99
	100	1
	101
	102
	103
	104
	105	1
	106
	107
	108
	109
	110	1
	111
	112
	113
	114
	115	2
	116
	117
	118
	119
	120	2
	121
	122
	123
	124
	125	2
	126
	127
	128
	129
	130	2
	131
	132
	133
	134
	135	2
	136
	137
	138
	139
	140	2
	141
	142
	143
	144
	145	2
	146
	147
	148
	149
	150	2
	151
	152
	153
	154
	155	2
	156
	157
	158
	159
	160	1
	161
	162
	163
	164
	165	2
	166
	167
	168
	169
	170	2
	171
	172
	173
	174
	175	2
	176
	177
	178
	179
	180	2
	181
	182
	183
	184
	185	3
	186
	187
	188
	189
	190	2
	191
	192
	193
	194
	195	3
	196
	197
	198
	199
	200	3
	201
	202
	203
	204
	205	3
	206
	207
	208
	209
	210	2
	211
	212
	213
	214
	215	1
	216
	217
	218
	219
	220	1
	221
	222
	223
	224
	225	1
	226
	227
	228
	229
	230	1
	231
	232
	233
	234
	235	2
	236
	237
	238
	239
	240	2
	241
	242
	243
	244
	245	3
	246
	247
	248
	249
	250	3
	251
	252
	253
	254
	255	3
	256
	257
	258
	259
	260	2
	261
	262
	263
	264
	265	2
	266
	267
	268
	269
	270	2
	271
	272
	273
	274
	275	2
	276
	277
	278
	279
	280	2
	281
	282
	283
	284
	285	3
	286
	287
	288
	289
	290	3
	291
	292
	293
	294
	295	3
	296
	297
	298
	299
	300	2
	301
	302
	303
	304
	305	2
	306
	307
	308
	309
	310	2
	311
	312
	313
	314
	315	2
	316
	317
	318
	319
	320	2
	321
	322
	323
	324
	325	2
	326
	327
	328
	329
	330	2
	331
	332
	333
	334
	335	2
	336
	337
	338
	339
	340	2
	341
	342
	343
	344
	345	2
	346
	347
	348
	349
	350	2
	351
	352
	353
	354
	355	2
	356
	357
	358
	359
	360	2
	361
	362
	363
	364
	365	2
	366
	367
	368
	369
	370	2
	371
	372
	373
	374
	375	2
	376
	377
	378
	379
	380	2
	381
	382
	383
	384
	385	2
	386
	387
	388
	389
	390	2
	391
	392
	393
	394
	395	2
	396
	397
	398
	399
	400	2
	401
	402
	403
	404
	405	1
	406
	407
	408
	409
	410	2
	411
	412
	413
	414
	415	2
	416
	417
	418
	419
	420	2
	421
	422
	423
	424
	425	1
	426
	427
	428
	429
	430	2
	431
	432
	433
	434
	435	2
	436
	437
	438
	439
	440	2
	441
	442
	443
	444
	445	2
	446
	447
	448
	449
	450	2
	451
	452
	453
	454
	455	2
	456
	457
	458
	459
	460	3
	461
	462
	463
	464
	465	2
	466
	467
	468
	469
	470	3
	471
	472
	473
	474
	475	1
	476
	477
	478
	479
	480	2
	481
	482
	483
	484
	485	2
	486
	487
	488
	489
	490	2
	491
	492
	493
	494
	495	3
	496
	497
	498
	499
	500	3
	501
	502
	503
	504
	505	3
	506
	507
	508
	509
	510	3
	511
	512
	513
	514
	515	3
	516
	517
	518
	519
	520	3
	521
	522
	523	3
[truncated: 57 more columns]
